# Supplementary material for: Non-Muscle-Invasive Bladder Carcinoma with Respect to Basal Versus Luminal Keratin Expression
Source: PubMed Central journal article supplement (PMC7589917; doi:10.3390/ijms21207726), 2020-10-19
Supplement: ijms-21-07726-s001.pdf [file ijms-21-07726-s001.pdf]

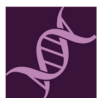

*Supplementary Information*

# **Non-Muscle-Invasive Bladder Carcinoma with Respect to Basal Versus Luminal Keratin Expression**

**Minsun Jung**<sup>1</sup>, **Insoon Jang**<sup>2</sup>, **Kwangsoo Kim**<sup>3</sup>, and **Kyung Chul Moon**<sup>1,4,\*</sup>

<sup>1</sup> Department of Pathology, Seoul National University College of Medicine, Seoul 03080, Korea; jjunglammy@gmail.com

<sup>2</sup> Biomedical Research Institute, Seoul National University Hospital, Seoul 03080, Korea; isjang1324@gmail.com

<sup>3</sup> Transdisciplinary Department of Medicine & Advanced Technology, Seoul National University Hospital, Seoul 03080, Korea; kksoo716@gmail.com

<sup>4</sup> Kidney Research Institute, Medical Research Center, Seoul National University College of Medicine, Seoul 03080, Korea

\* Correspondence: blue7270@gmail.com; Tel.: +82-2-740-8380

Received: 22 September 2020; Accepted: 13 October 2020; Published: date

1. Figures S1–S9
2. Tables S1–S5

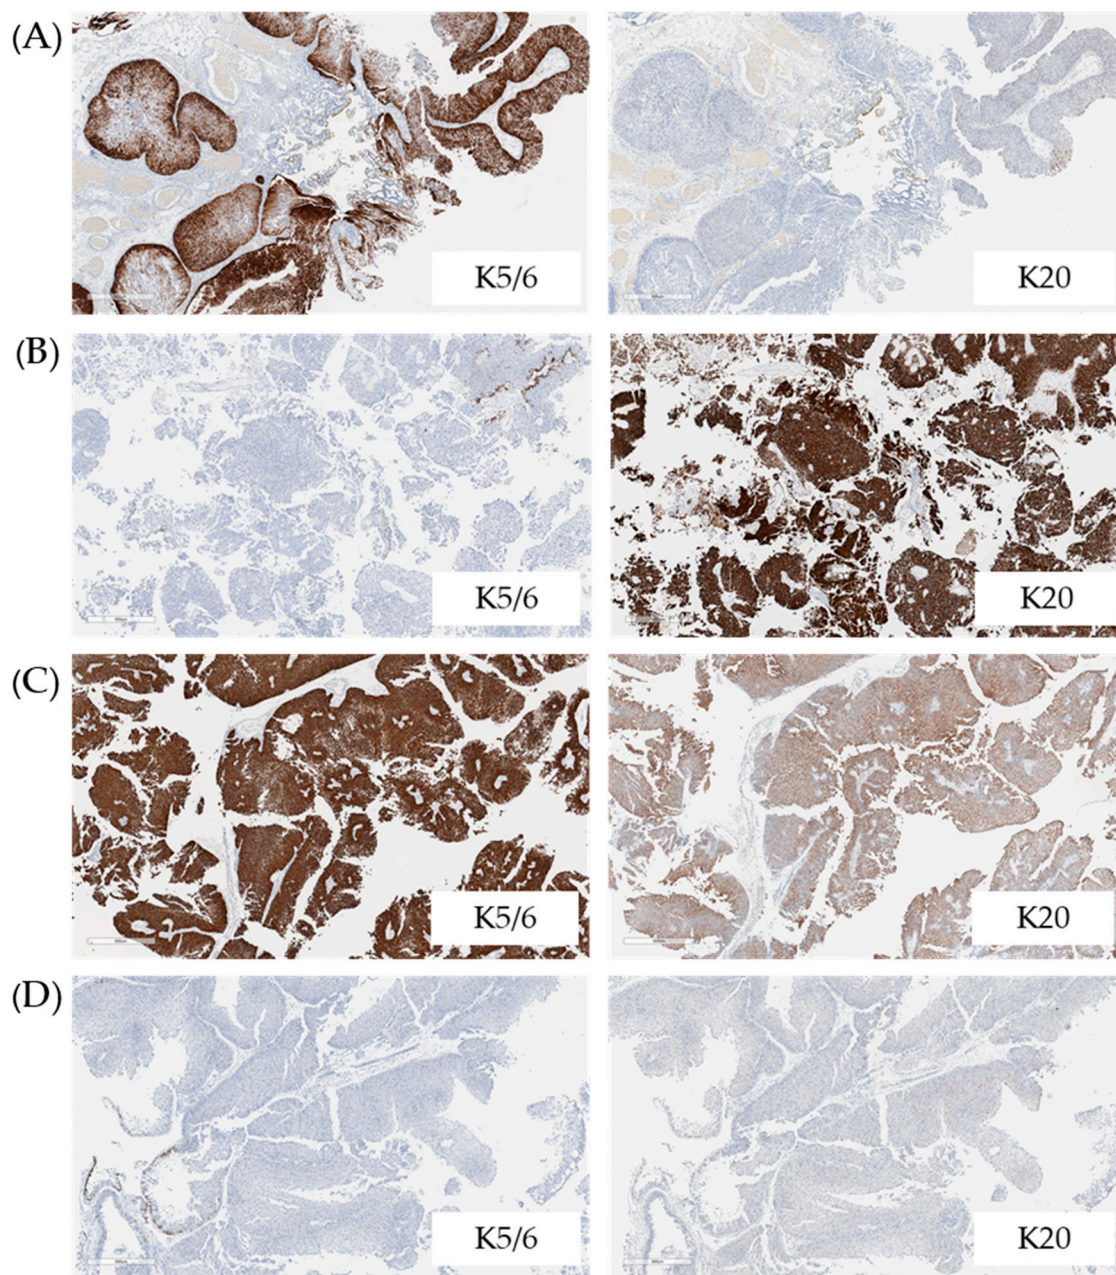

**Figure S1.** Representative microscopic images of IHC staining for K5/6 and K20. (a) K5/6-only group. (b) K20-only group. (c) Double-high group. (d) Double-low group.

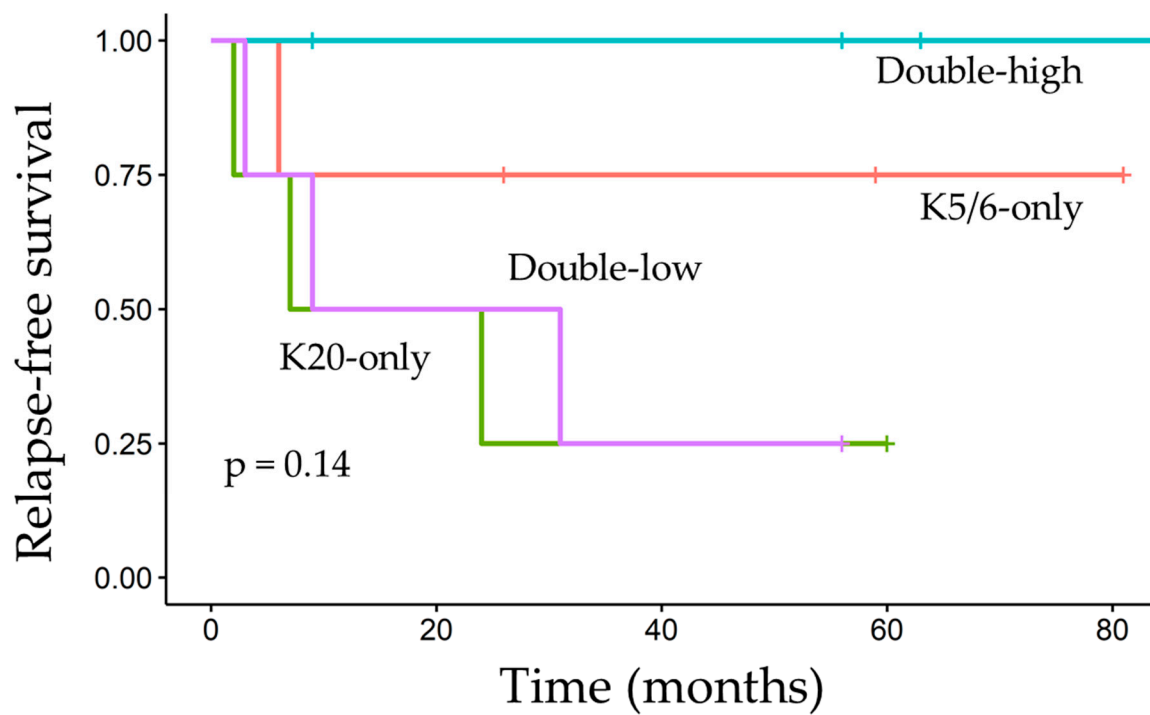

Figure S2. Kaplan-Meier and log-rank tests of relapse-free survival of the groups.

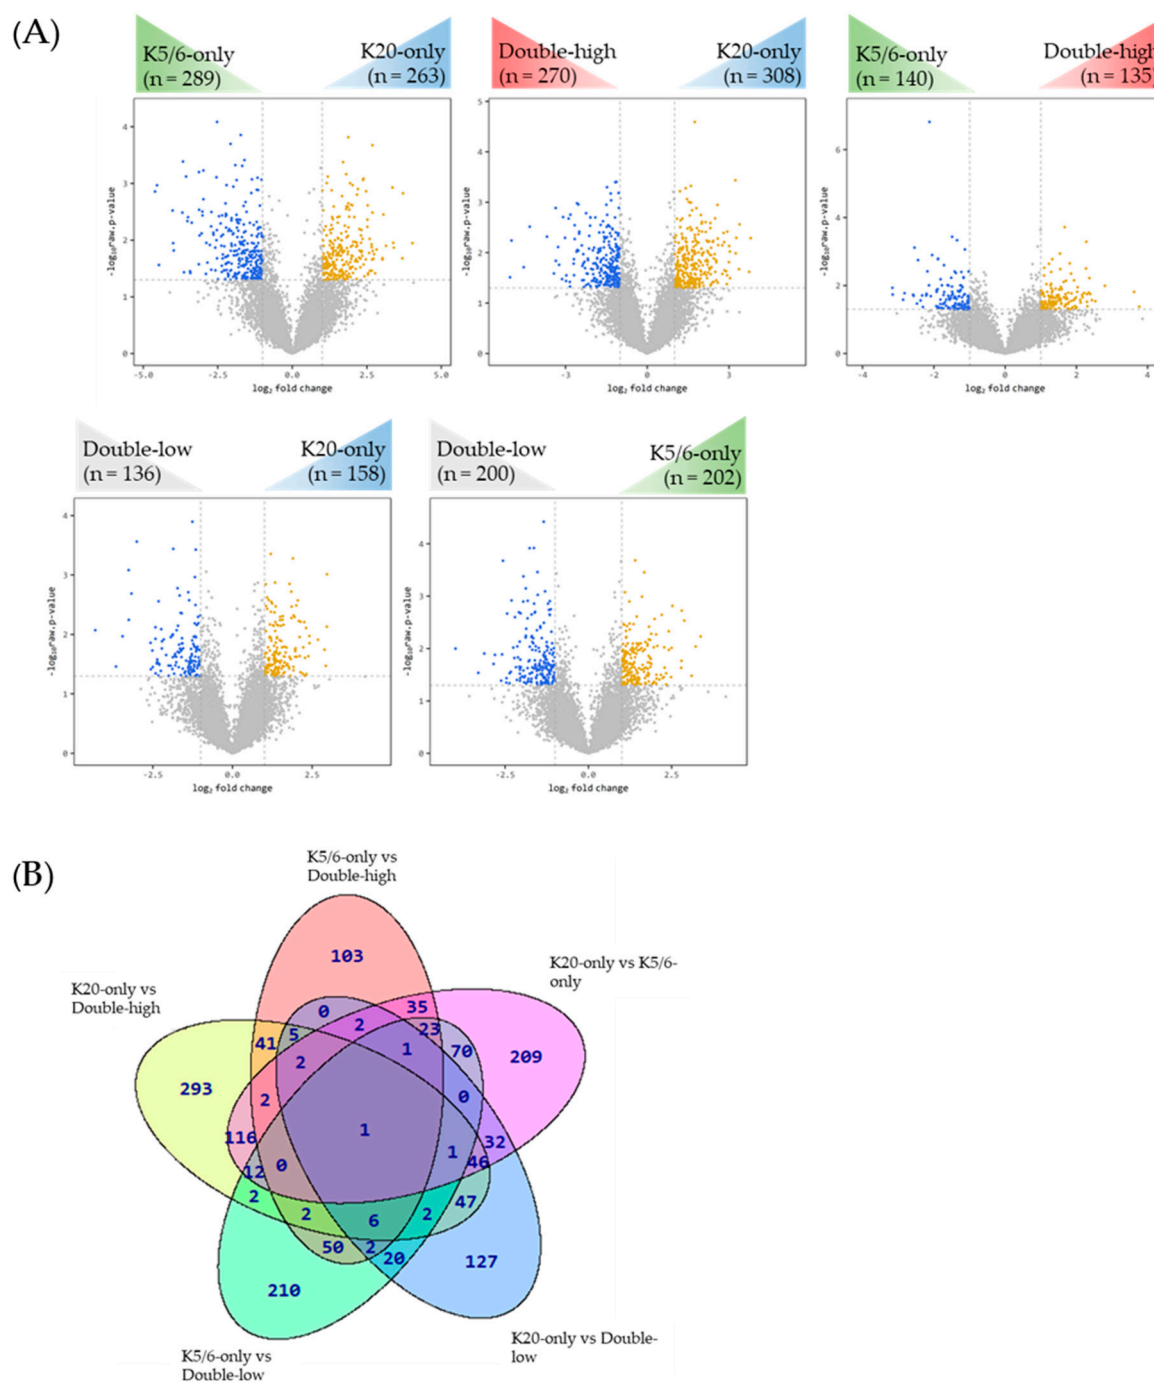

**Figure S3.** Identification of DEGs between the groups. (a) Numbers of DEGs. (b) Venn diagram of DEGs.

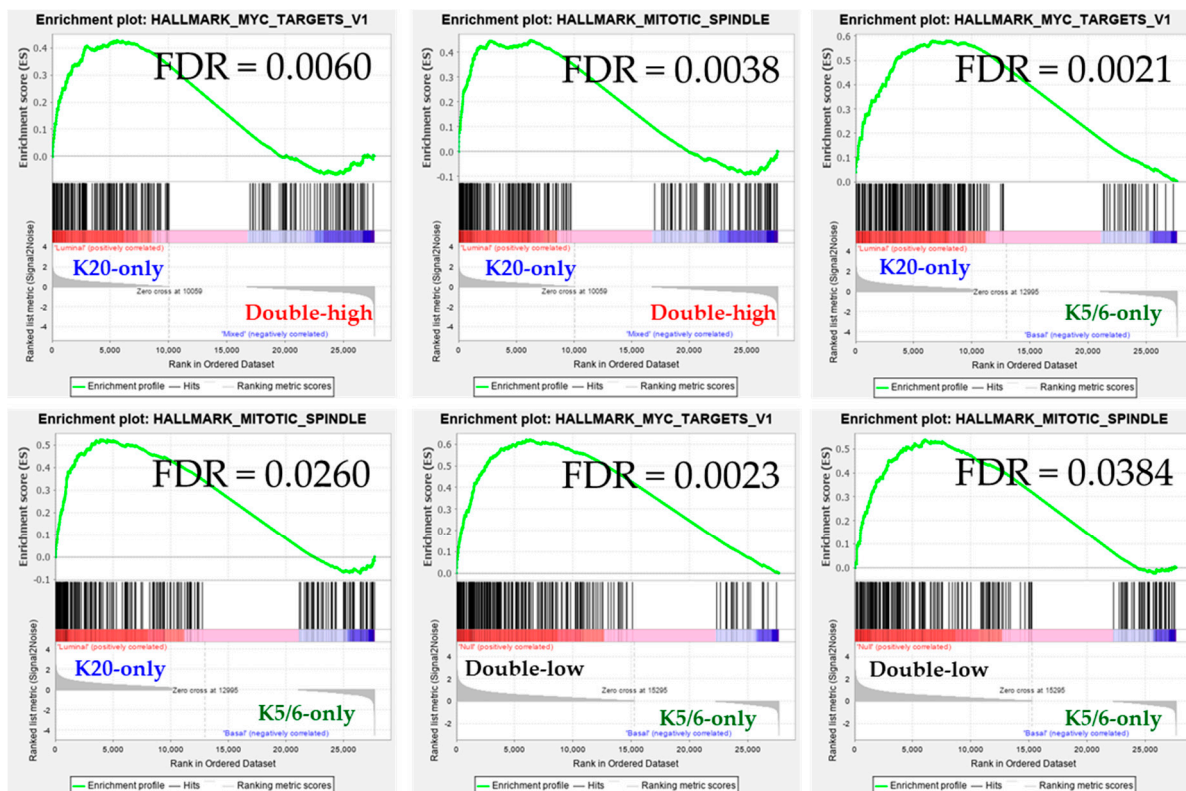

Figure S4. Cell proliferation functions significantly enriched in the groups identified by the GSEA.

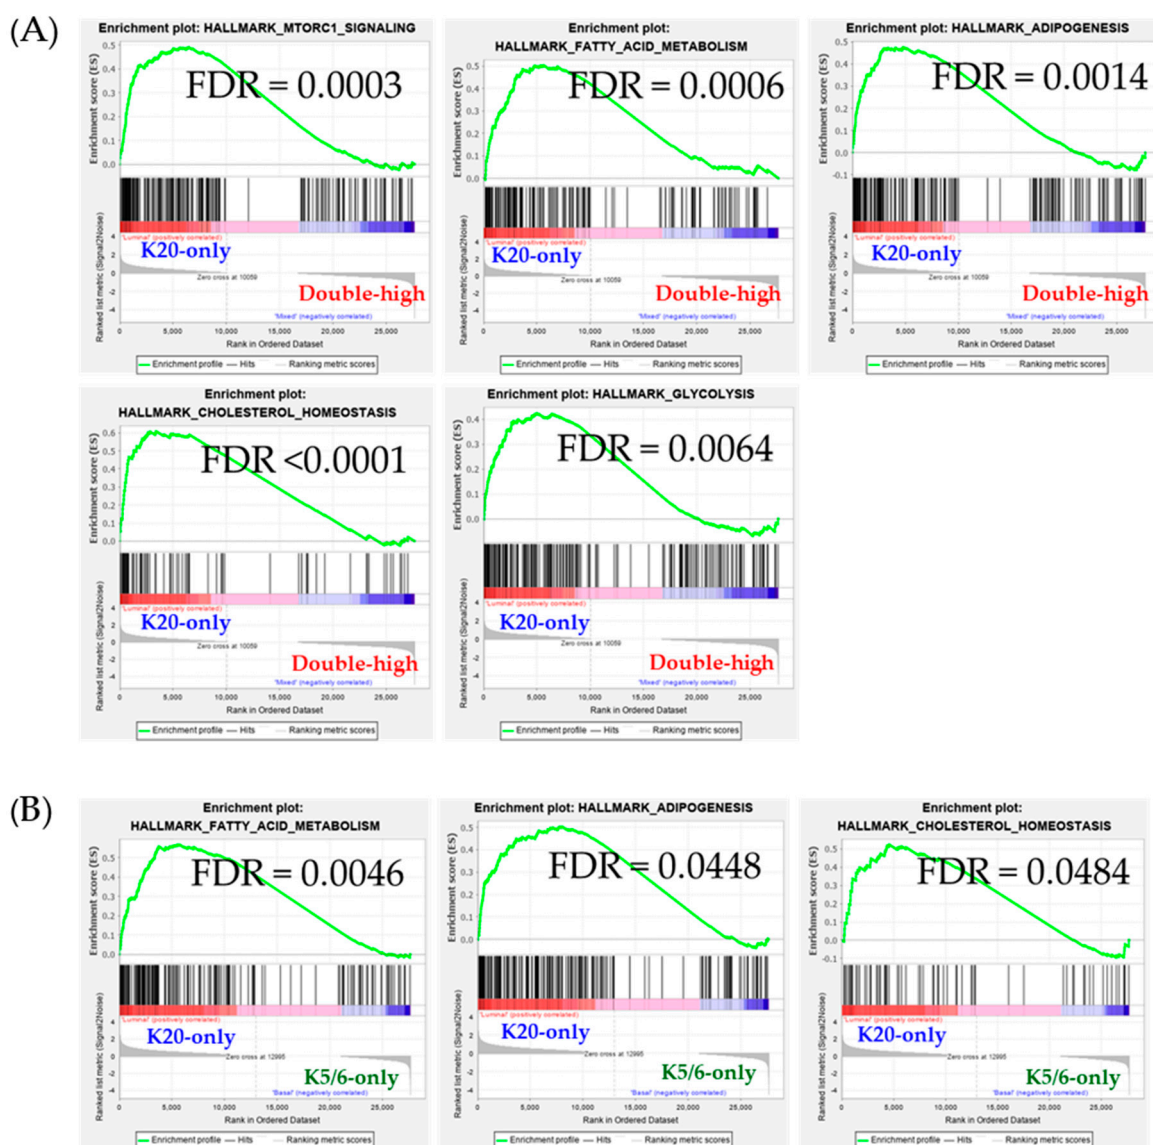

**Figure S5.** Metabolism functions significantly enriched in the groups identified by the GSEA. (a) Comparison between the K20-only and double-high groups. (b) Comparison between the K20-only and K5/6-only groups.

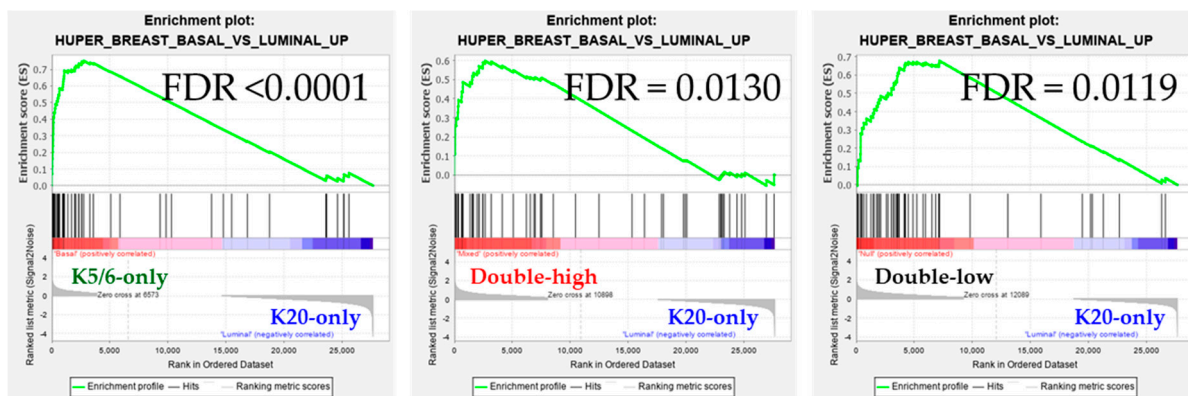

**Figure S6.** Gene expression characteristics of basal vs. luminal cells of the breast significantly enriched in the groups identified by the GSEA.

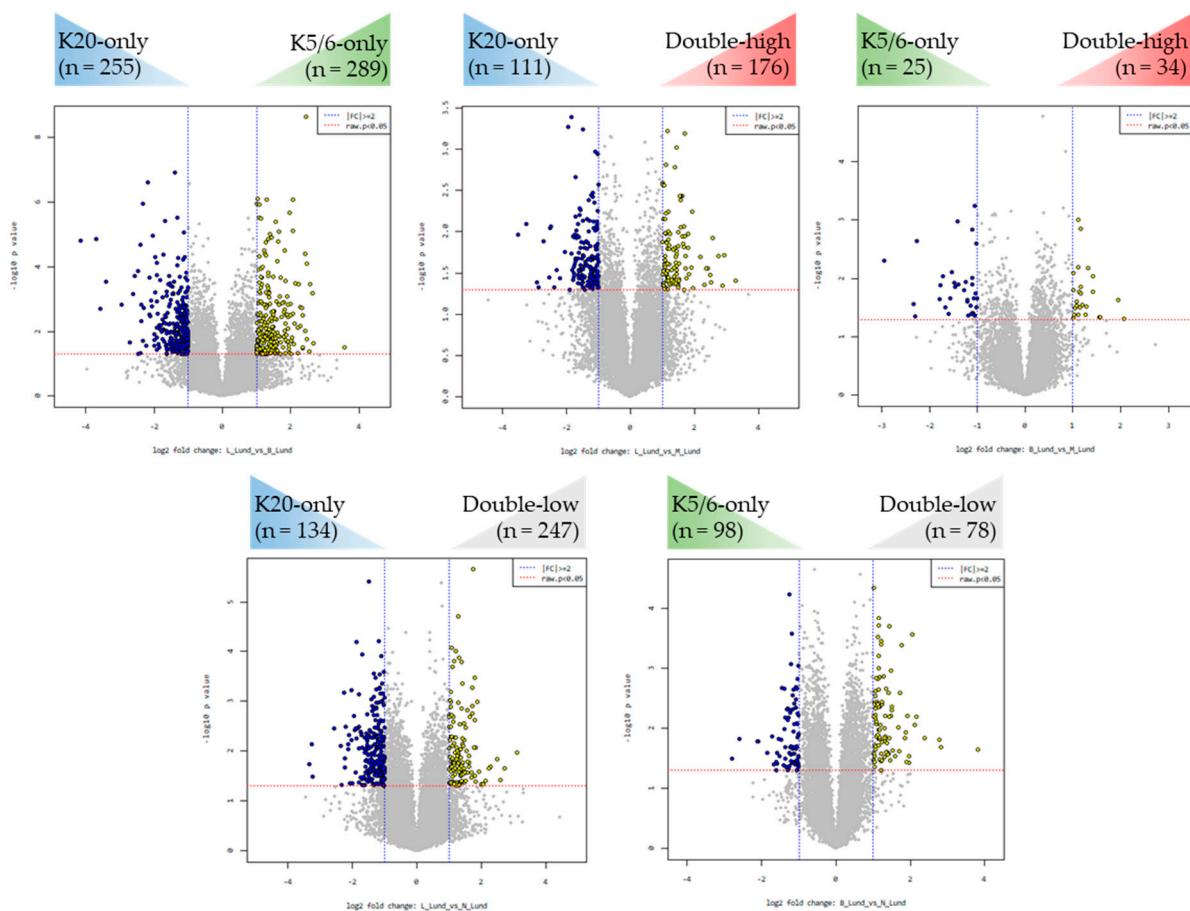

**Figure S7.** Identification of DEGs between the Lund cohort groups.



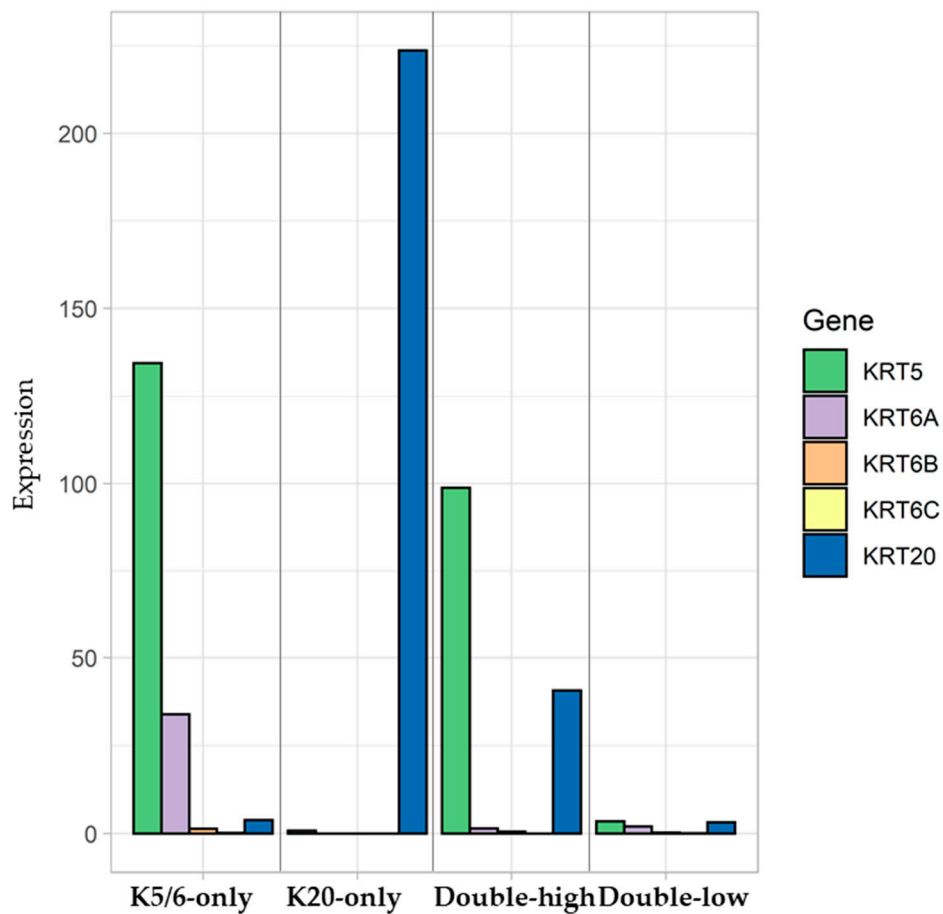

Figure S8. KRT gene expression levels of each group.

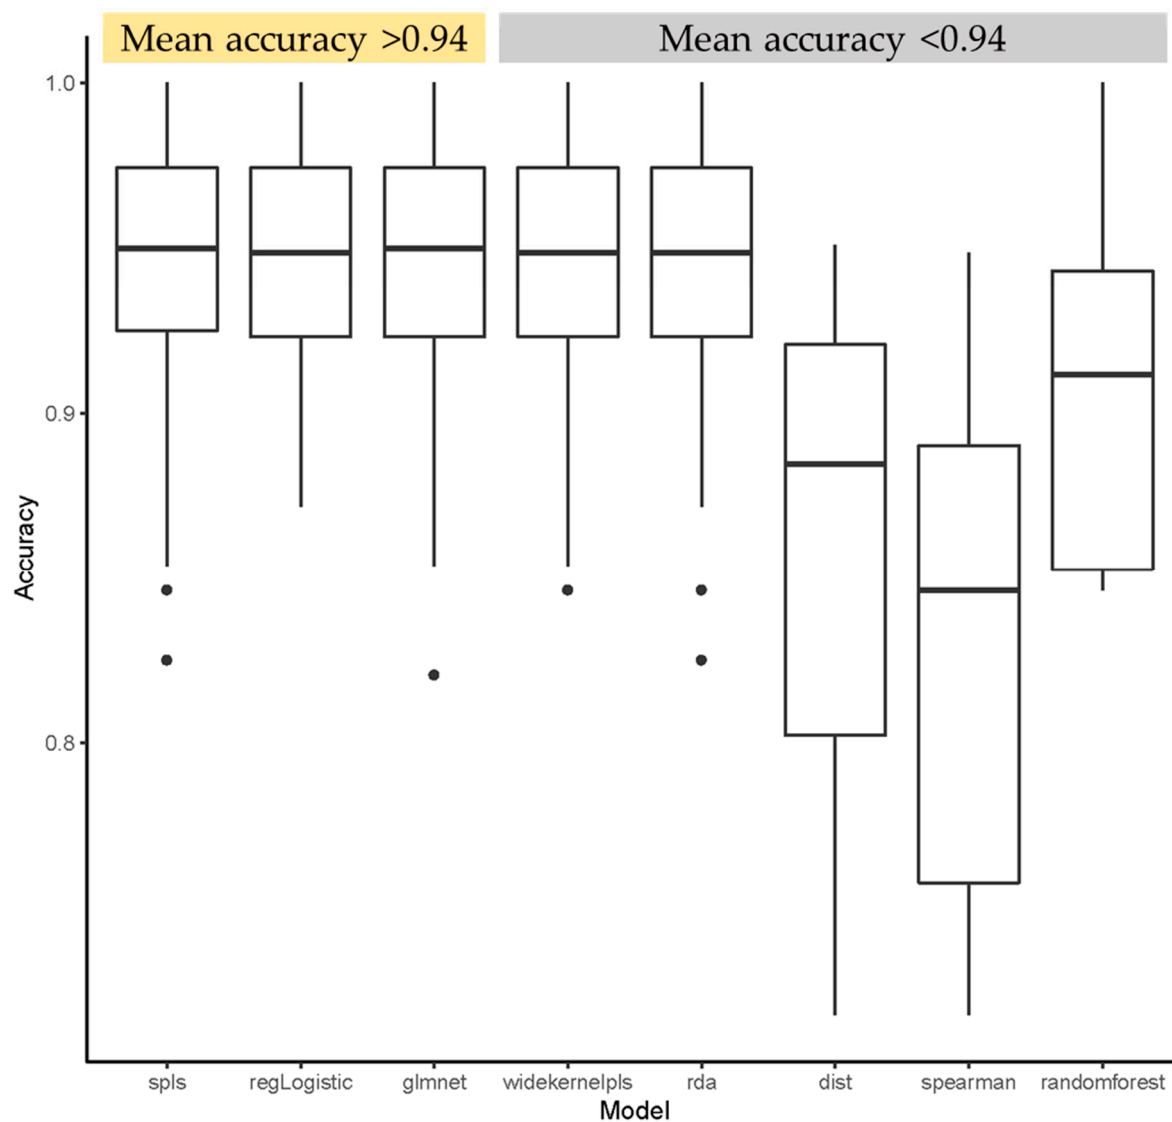

**Figure S9.** Accuracy of prediction models validated using gene-expression classifier of UROMOL NMIBC subtypes.

**Table S1.** Clinicopathological details of the groups

| Group                      | K5/6-only (n = 4) | K20-only (n = 4) | Double-high (n = 4) | Double-low (n = 4) | p <sup>a</sup> |
|----------------------------|-------------------|------------------|---------------------|--------------------|----------------|
| Age, median (range)        | 65 years (63-76)  | 72 years (67-83) | 68 years (58-73)    | 72 years (63-83)   | 0.486          |
| Sex                        |                   |                  |                     |                    | 0.543          |
| Female                     | 0 (0.0%)          | 1 (25.0%)        | 2 (50.0%)           | 0 (0.0%)           |                |
| Male                       | 4 (100.0%)        | 3 (75.0%)        | 2 (50.0%)           | 4 (100.0%)         |                |
| Stromal invasion (T stage) |                   |                  |                     |                    | 0.859          |
| Present (T1)               | 4 (100.0%)        | 3 (75.0%)        | 2 (50.0%)           | 3 (75.0%)          |                |
| Absent (Ta)                | 0 (0.0%)          | 1 (25.0%)        | 2 (50.0%)           | 1 (25.0%)          |                |
| WHO grade                  |                   |                  |                     |                    | 1.000          |
| High                       | 4 (100.0%)        | 4 (100.0%)       | 4 (100.0%)          | 4 (100.0%)         |                |
| Low                        | 0 (0.0%)          | 0 (0.0%)         | 0 (0.0%)            | 0 (0.0%)           |                |
| Carcinoma <i>in situ</i>   |                   |                  |                     |                    | 1.000          |
| Present                    | 0 (0.0%)          | 1 (25.0%)        | 0 (0.0%)            | 1 (25.0%)          |                |
| Absent                     | 4 (100.0%)        | 3 (75.0%)        | 4 (100.0%)          | 3 (75.0%)          |                |
| BCG after resection        |                   |                  |                     |                    | 1.000          |
| Yes                        | 2 (50.0%)         | 3 (75.0%)        | 1 (25.0%)           | 1 (25.0%)          |                |
| No                         | 2 (50.0%)         | 1 (25.0%)        | 3 (75.0%)           | 3 (75.0%)          |                |
| DV200 (mean ± S.D.)        | 48.0 ± 18.6%      | 68.2 ± 6.0%      | 59.6 ± 9.0%         | 71.5 ± 15.4%       | 0.100          |
| Immunohistochemistry score |                   |                  |                     |                    |                |
| K5/6 (mean ± S.D.)         | 5.8 ± 0.5         | 0.0 ± 0.0        | 4.5 ± 1.0           | 1.2 ± 0.5          | 0.003          |
| K20 (mean ± S.D.)          | 2.5 ± 0.6         | 5.8 ± 0.5        | 4.8 ± 1.0           | 1.5 ± 0.6          | 0.004          |
| K14 (mean ± S.D.)          | 1.8 ± 1.3         | 0.0 ± 0.0        | 0.8 ± 1.0           | 0.2 ± 0.5          | 0.099          |
| GATA3 (mean ± S.D.)        | 6.0 ± 0.0         | 6.0 ± 0.0        | 6.0 ± 0.0           | 5.8 ± 0.5          | 0.426          |
| FOXA1 (mean ± S.D.)        | 5.8 ± 0.5         | 5.8 ± 0.5        | 6.0 ± 0.0           | 6.0 ± 0.0          | 0.646          |
| p53                        |                   |                  |                     |                    | 0.333          |
| Overexpression             | 0 (0.0%)          | 3 (75.0%)        | 2 (50.0%)           | 1 (25.0%)          |                |
| No overexpression          | 4 (100.0%)        | 1 (25.0%)        | 2 (50.0%)           | 3 (75.0%)          |                |

<sup>a</sup>: Pearson's chi-squared or Fisher's exact tests for categorical variables; Mann-Whitney U test for immunohistochemistry

**Table S2.** GO and KEGG analyses of the groups.

| <b>K20-only vs K5/6-only</b>      |        |                                                               |             |            |
|-----------------------------------|--------|---------------------------------------------------------------|-------------|------------|
| Upregulated in the K20-only group | Source | Terms                                                         | FDR         | Term ID    |
|                                   | GO:CC  | intracellular                                                 | 1.19865E-08 | GO:0005622 |
|                                   | GO:CC  | organelle                                                     | 1.19865E-08 | GO:0043226 |
|                                   | GO:CC  | intracellular organelle                                       | 1.04288E-07 | GO:0043229 |
|                                   | GO:CC  | intracellular membrane-bounded organelle                      | 1.79728E-07 | GO:0043231 |
|                                   | GO:CC  | membrane-bounded organelle                                    | 2.00806E-07 | GO:0043227 |
|                                   | GO:CC  | nuclear outer membrane-endoplasmic reticulum membrane network | 4.44075E-05 | GO:0042175 |
|                                   | GO:CC  | cytoplasm                                                     | 4.44075E-05 | GO:0005737 |
|                                   | GO:CC  | endoplasmic reticulum membrane                                | 6.08089E-05 | GO:0005789 |
|                                   | GO:CC  | condensed chromosome                                          | 8.66986E-05 | GO:0000793 |
|                                   | GO:CC  | organelle membrane                                            | 9.0727E-05  | GO:0031090 |
|                                   | GO:CC  | condensed chromosome, centromeric region                      | 0.000238973 | GO:0000779 |
|                                   | GO:CC  | endomembrane system                                           | 0.000248882 | GO:0012505 |
|                                   | GO:CC  | condensed chromosome kinetochore                              | 0.000484199 | GO:0000777 |
|                                   | GO:CC  | cytosol                                                       | 0.000484199 | GO:0005829 |
|                                   | GO:CC  | kinetochore                                                   | 0.00059818  | GO:0000776 |
|                                   | GO:CC  | chromosome                                                    | 0.000916236 | GO:0005694 |
|                                   | GO:CC  | endoplasmic reticulum                                         | 0.002024112 | GO:0005783 |
|                                   | GO:CC  | chromosome, centromeric region                                | 0.002189696 | GO:0000775 |
|                                   | GO:CC  | intracellular non-membrane-bounded organelle                  | 0.0030623   | GO:0043232 |
|                                   | GO:CC  | spindle                                                       | 0.0030623   | GO:0005819 |
|                                   | GO:CC  | non-membrane-bounded organelle                                | 0.003152998 | GO:0043228 |
|                                   | GO:CC  | organelle envelope                                            | 0.004304358 | GO:0031967 |
|                                   | GO:CC  | envelope                                                      | 0.004304358 | GO:0031975 |
|                                   | GO:BP  | cell cycle                                                    | 0.004867688 | GO:0007049 |
|                                   | GO:CC  | chromosomal region                                            | 0.006471104 | GO:0098687 |
|                                   | GO:CC  | host cell                                                     | 0.009640099 | GO:0043657 |
|                                   | GO:CC  | host cellular component                                       | 0.009640099 | GO:0018995 |
|                                   | GO:BP  | cellular response to stress                                   | 0.011353697 | GO:0033554 |
|                                   | GO:BP  | mitotic cell cycle                                            | 0.011353697 | GO:0000278 |
|                                   | GO:BP  | double-strand break repair via homologous recombination       | 0.011353697 | GO:0000724 |
|                                   | GO:BP  | recombinational repair                                        | 0.011353697 | GO:0000725 |
|                                   | GO:BP  | cell division                                                 | 0.011353697 | GO:0051301 |
|                                   | GO:BP  | mitotic cell cycle process                                    | 0.011353697 | GO:1903047 |
|                                   | GO:BP  | double-strand break repair                                    | 0.011353697 | GO:0006302 |
|                                   | GO:BP  | cell cycle process                                            | 0.011353697 | GO:0022402 |
|                                   | GO:CC  | nuclear envelope                                              | 0.013402502 | GO:0005635 |
|                                   | GO:CC  | nuclear membrane                                              | 0.013780238 | GO:0031965 |
|                                   | GO:CC  | nucleus                                                       | 0.014086337 | GO:0005634 |
|                                   | GO:CC  | dendrite cytoplasm                                            | 0.014086337 | GO:0032839 |

|  |       |                                                               |             |            |
|--|-------|---------------------------------------------------------------|-------------|------------|
|  | GO:CC | condensed nuclear chromosome outer kinetochore                | 0.016947953 | GO:0000942 |
|  | GO:BP | mRNA transport                                                | 0.017404477 | GO:0051028 |
|  | GO:BP | nucleobase-containing compound transport                      | 0.017404477 | GO:0015931 |
|  | GO:BP | regulation of cellular response to stress                     | 0.019209402 | GO:0080135 |
|  | GO:BP | DNA recombination                                             | 0.019209402 | GO:0006310 |
|  | GO:CC | condensed nuclear chromosome kinetochore                      | 0.021860164 | GO:0000778 |
|  | GO:BP | organelle organization                                        | 0.022736335 | GO:0006996 |
|  | GO:BP | establishment of RNA localization                             | 0.023104496 | GO:0051236 |
|  | GO:BP | nucleic acid transport                                        | 0.023104496 | GO:0050657 |
|  | GO:BP | regulation of cellular response to heat                       | 0.023104496 | GO:1900034 |
|  | GO:BP | RNA localization                                              | 0.023104496 | GO:0006403 |
|  | GO:BP | tRNA-containing ribonucleoprotein complex export from nucleus | 0.023104496 | GO:0071431 |
|  | GO:BP | RNA transport                                                 | 0.023104496 | GO:0050658 |
|  | GO:BP | tRNA export from nucleus                                      | 0.023104496 | GO:0006409 |
|  | GO:BP | DNA repair                                                    | 0.023104496 | GO:0006281 |
|  | GO:BP | DNA replication                                               | 0.023445885 | GO:0006260 |
|  | GO:BP | ncRNA export from nucleus                                     | 0.023709531 | GO:0097064 |
|  | GO:BP | mRNA-containing ribonucleoprotein complex export from nucleus | 0.023709531 | GO:0071427 |
|  | GO:BP | organic substance transport                                   | 0.023709531 | GO:0071702 |
|  | GO:BP | mRNA export from nucleus                                      | 0.023709531 | GO:0006406 |
|  | GO:BP | DNA packaging                                                 | 0.023709531 | GO:0006323 |
|  | GO:BP | tRNA transport                                                | 0.023709531 | GO:0051031 |
|  | GO:BP | DNA conformation change                                       | 0.023709531 | GO:0071103 |
|  | GO:BP | protein localization to nuclear inner membrane                | 0.024480669 | GO:0036228 |
|  | GO:CC | spindle pole                                                  | 0.027215771 | GO:0000922 |
|  | GO:MF | structural constituent of nuclear pore                        | 0.0281312   | GO:0017056 |
|  | GO:CC | microtubule cytoskeleton                                      | 0.035886019 | GO:0015630 |
|  | GO:BP | oxoacid metabolic process                                     | 0.038722382 | GO:0043436 |
|  | GO:BP | sister chromatid segregation                                  | 0.038722382 | GO:0000819 |
|  | GO:BP | cellular localization                                         | 0.041189716 | GO:0051641 |
|  | GO:BP | nuclear chromosome segregation                                | 0.041189716 | GO:0098813 |
|  | GO:BP | carboxylic acid metabolic process                             | 0.043730223 | GO:0019752 |
|  | GO:BP | organic acid metabolic process                                | 0.046257357 | GO:0006082 |
|  | GO:BP | ribonucleoprotein complex export from nucleus                 | 0.046943103 | GO:0071426 |
|  | GO:BP | ribonucleoprotein complex localization                        | 0.046943103 | GO:0071166 |
|  | GO:BP | cellular response to DNA damage stimulus                      | 0.046943103 | GO:0006974 |
|  | GO:BP | intracellular protein transport                               | 0.046943103 | GO:0006886 |
|  | KEGG  | Metabolic pathways                                            | 1.60895E-07 | 01100      |
|  | KEGG  | RNA transport                                                 | 0.00783835  | 03013      |
|  | KEGG  | Apoptosis                                                     | 0.01418239  | 04210      |
|  | KEGG  | Herpes simplex virus 1 infection                              | 0.036386979 | 05168      |
|  | KEGG  | Sphingolipid signaling pathway                                | 0.036386979 | 04071      |

|                                           |               |                                                           |             |                |
|-------------------------------------------|---------------|-----------------------------------------------------------|-------------|----------------|
|                                           | KEGG          | Platinum drug resistance                                  | 0.04013763  | 01524          |
|                                           | KEGG          | DNA replication                                           | 0.048297864 | 03030          |
| <b>Upregulated in the K5/6-only group</b> | <b>Source</b> | <b>Terms</b>                                              | <b>FDR</b>  | <b>Term ID</b> |
|                                           | GO:BP         | tissue development                                        | 5.33945E-06 | GO:0009888     |
|                                           | GO:BP         | anatomical structure morphogenesis                        | 5.33945E-06 | GO:0009653     |
|                                           | GO:BP         | anatomical structure formation involved in morphogenesis  | 7.42966E-06 | GO:0048646     |
|                                           | GO:BP         | cell migration                                            | 1.39591E-05 | GO:0016477     |
|                                           | GO:BP         | tissue morphogenesis                                      | 3.49652E-05 | GO:0048729     |
|                                           | GO:BP         | gastrulation                                              | 4.84466E-05 | GO:0007369     |
|                                           | GO:BP         | locomotion                                                | 4.84466E-05 | GO:0040011     |
|                                           | GO:BP         | cell motility                                             | 4.84466E-05 | GO:0048870     |
|                                           | GO:BP         | localization of cell                                      | 4.84466E-05 | GO:0051674     |
|                                           | GO:BP         | regulation of multicellular organismal process            | 4.84466E-05 | GO:0051239     |
|                                           | GO:BP         | embryonic morphogenesis                                   | 5.90975E-05 | GO:0048598     |
|                                           | GO:BP         | formation of primary germ layer                           | 9.22979E-05 | GO:0001704     |
|                                           | GO:BP         | movement of cell or subcellular component                 | 9.22979E-05 | GO:0006928     |
|                                           | GO:BP         | cell adhesion                                             | 0.000100528 | GO:0007155     |
|                                           | GO:BP         | positive regulation of cellular protein metabolic process | 0.000100808 | GO:0032270     |
|                                           | GO:BP         | biological adhesion                                       | 0.000100808 | GO:0022610     |
|                                           | GO:BP         | intracellular signal transduction                         | 0.000113937 | GO:0035556     |
|                                           | GO:BP         | regulation of developmental process                       | 0.000113937 | GO:0050793     |
|                                           | GO:BP         | regulation of cellular protein metabolic process          | 0.00013631  | GO:0032268     |
|                                           | GO:CC         | cell junction                                             | 0.000172843 | GO:0030054     |
|                                           | GO:CC         | anchoring junction                                        | 0.000172843 | GO:0070161     |
|                                           | GO:BP         | regulation of molecular function                          | 0.000199508 | GO:0065009     |
|                                           | GO:BP         | system development                                        | 0.000230655 | GO:0048731     |
|                                           | GO:MF         | insulin-like growth factor I binding                      | 0.000236269 | GO:0031994     |
|                                           | GO:MF         | MAP kinase tyrosine/serine/threonine phosphatase activity | 0.000236269 | GO:0017017     |
|                                           | GO:BP         | epithelium development                                    | 0.000246989 | GO:0060429     |
|                                           | GO:BP         | regulation of intracellular signal transduction           | 0.000246989 | GO:1902531     |
|                                           | GO:BP         | cellular developmental process                            | 0.000246989 | GO:0048869     |
|                                           | GO:BP         | negative regulation of response to stimulus               | 0.000268665 | GO:0048585     |
|                                           | GO:BP         | regulation of multicellular organismal development        | 0.000268665 | GO:2000026     |
|                                           | GO:BP         | anatomical structure development                          | 0.000268665 | GO:0048856     |
|                                           | GO:BP         | inactivation of MAPK activity                             | 0.000268665 | GO:0000188     |
|                                           | GO:BP         | regulation of cell communication                          | 0.000268665 | GO:0010646     |
|                                           | GO:BP         | animal organ morphogenesis                                | 0.0002695   | GO:0009887     |
|                                           | GO:BP         | positive regulation of protein metabolic process          | 0.000306966 | GO:0051247     |
|                                           | GO:BP         | cell differentiation                                      | 0.000306966 | GO:0030154     |
|                                           | GO:BP         | embryo development                                        | 0.00031511  | GO:0009790     |
|                                           | GO:BP         | regulation of signaling                                   | 0.00033812  | GO:0023051     |
|                                           | GO:BP         | regulation of protein metabolic process                   | 0.00035891  | GO:0051246     |

|  |       |                                                                |             |            |
|--|-------|----------------------------------------------------------------|-------------|------------|
|  | GO:MF | MAP kinase phosphatase activity                                | 0.000359081 | GO:0033549 |
|  | GO:BP | negative chemotaxis                                            | 0.00036024  | GO:0050919 |
|  | GO:BP | positive regulation of molecular function                      | 0.00036024  | GO:0044093 |
|  | GO:BP | cell-substrate adhesion                                        | 0.000369048 | GO:0031589 |
|  | GO:BP | positive regulation of cellular process                        | 0.000447366 | GO:0048522 |
|  | GO:BP | multicellular organism development                             | 0.000447366 | GO:0007275 |
|  | GO:CC | lamellipodium                                                  | 0.000577259 | GO:0030027 |
|  | GO:BP | positive regulation of biological process                      | 0.000588812 | GO:0048518 |
|  | GO:BP | signal transduction by p53 class mediator                      | 0.000676253 | GO:0072331 |
|  | GO:BP | positive regulation of developmental process                   | 0.000676253 | GO:0051094 |
|  | GO:BP | extracellular structure organization                           | 0.000676253 | GO:0043062 |
|  | GO:BP | nephron development                                            | 0.000676253 | GO:0072006 |
|  | GO:BP | extracellular matrix organization                              | 0.000676253 | GO:0030198 |
|  | GO:BP | cell morphogenesis                                             | 0.000688925 | GO:0000902 |
|  | GO:BP | mesodermal cell differentiation                                | 0.000809959 | GO:0048333 |
|  | GO:BP | cellular component morphogenesis                               | 0.000835326 | GO:0032989 |
|  | GO:BP | animal organ development                                       | 0.000835326 | GO:0048513 |
|  | GO:BP | positive regulation of multicellular organismal process        | 0.000923163 | GO:0051240 |
|  | GO:BP | synapse organization                                           | 0.001034767 | GO:0050808 |
|  | GO:BP | axon guidance                                                  | 0.00110664  | GO:0007411 |
|  | GO:BP | regulation of nervous system development                       | 0.001127625 | GO:0051960 |
|  | GO:BP | camera-type eye development                                    | 0.001127625 | GO:0043010 |
|  | GO:BP | cellular component organization                                | 0.001127625 | GO:0016043 |
|  | GO:BP | regulation of signal transduction                              | 0.001127625 | GO:0009966 |
|  | GO:BP | intrinsic apoptotic signaling pathway by p53 class mediator    | 0.001127625 | GO:0072332 |
|  | GO:BP | regulation of cell differentiation                             | 0.001127625 | GO:0045595 |
|  | GO:BP | neuron projection guidance                                     | 0.001127625 | GO:0097485 |
|  | GO:BP | lens development in camera-type eye                            | 0.001127625 | GO:0002088 |
|  | GO:BP | neural crest cell development                                  | 0.001127625 | GO:0014032 |
|  | GO:BP | developmental process                                          | 0.001143813 | GO:0032502 |
|  | GO:BP | sensory organ development                                      | 0.001143813 | GO:0007423 |
|  | GO:BP | generation of neurons                                          | 0.001237296 | GO:0048699 |
|  | GO:BP | eye development                                                | 0.001237296 | GO:0001654 |
|  | GO:BP | positive regulation of macromolecule metabolic process         | 0.001237296 | GO:0010604 |
|  | GO:BP | endoderm development                                           | 0.001237296 | GO:0007492 |
|  | GO:BP | cellular component organization or biogenesis                  | 0.001342805 | GO:0071840 |
|  | GO:BP | renal system development                                       | 0.001342805 | GO:0072001 |
|  | GO:BP | visual system development                                      | 0.001342805 | GO:0150063 |
|  | GO:BP | stem cell development                                          | 0.001342805 | GO:0048864 |
|  | GO:BP | mesenchymal cell development                                   | 0.001342805 | GO:0014031 |
|  | GO:BP | DNA damage response, signal transduction by p53 class mediator | 0.001342805 | GO:0030330 |
|  | GO:BP | odontogenesis                                                  | 0.001342805 | GO:0042476 |

|  |       |                                                                                       |             |            |
|--|-------|---------------------------------------------------------------------------------------|-------------|------------|
|  | GO:BP | urogenital system development                                                         | 0.001379132 | GO:0001655 |
|  | GO:BP | cell-matrix adhesion                                                                  | 0.001432088 | GO:0007160 |
|  | GO:BP | sensory system development                                                            | 0.001452271 | GO:0048880 |
|  | GO:CC | cytoplasm                                                                             | 0.001458499 | GO:0005737 |
|  | GO:BP | regulation of protein modification process                                            | 0.001468084 | GO:0031399 |
|  | GO:BP | morphogenesis of a branching structure                                                | 0.001524106 | GO:0001763 |
|  | GO:BP | nephron epithelium development                                                        | 0.001524106 | GO:0072009 |
|  | GO:BP | negative regulation of signal transduction                                            | 0.001524106 | GO:0009968 |
|  | GO:BP | response to organic substance                                                         | 0.001524106 | GO:0010033 |
|  | GO:BP | tube development                                                                      | 0.00157922  | GO:0035295 |
|  | GO:BP | negative regulation of cell communication                                             | 0.001625312 | GO:0010648 |
|  | GO:BP | regulation of response to stimulus                                                    | 0.001674783 | GO:0048583 |
|  | GO:BP | negative regulation of signaling                                                      | 0.001689794 | GO:0023057 |
|  | GO:BP | cell morphogenesis involved in differentiation                                        | 0.001754096 | GO:0000904 |
|  | GO:BP | neural crest cell differentiation                                                     | 0.001754096 | GO:0014033 |
|  | GO:BP | positive regulation of regulatory T cell differentiation                              | 0.001756579 | GO:0045591 |
|  | GO:BP | cell communication                                                                    | 0.001772028 | GO:0007154 |
|  | GO:BP | kidney epithelium development                                                         | 0.001772028 | GO:0072073 |
|  | GO:BP | cell-cell adhesion                                                                    | 0.001829698 | GO:0098609 |
|  | GO:BP | intrinsic apoptotic signaling pathway in response to DNA damage by p53 class mediator | 0.001845061 | GO:0042771 |
|  | GO:CC | plasma membrane region                                                                | 0.001849115 | GO:0098590 |
|  | GO:BP | neurogenesis                                                                          | 0.001904196 | GO:0022008 |
|  | GO:BP | cell projection organization                                                          | 0.002039321 | GO:0030030 |
|  | GO:BP | positive regulation of cellular metabolic process                                     | 0.002258015 | GO:0031325 |
|  | GO:BP | regulation of cell migration                                                          | 0.002387785 | GO:0030334 |
|  | GO:BP | protein phosphorylation                                                               | 0.002414716 | GO:0006468 |
|  | GO:BP | nephron tubule development                                                            | 0.002467337 | GO:0072080 |
|  | GO:BP | positive regulation of nitrogen compound metabolic process                            | 0.002467337 | GO:0051173 |
|  | GO:BP | regulation of cellular component organization                                         | 0.002467337 | GO:0051128 |
|  | GO:BP | kidney development                                                                    | 0.002545981 | GO:0001822 |
|  | GO:BP | positive regulation of endopeptidase activity                                         | 0.002557145 | GO:0010950 |
|  | GO:BP | positive regulation of metabolic process                                              | 0.002557145 | GO:0009893 |
|  | GO:BP | kidney morphogenesis                                                                  | 0.002557145 | GO:0060993 |
|  | GO:BP | morphogenesis of a branching epithelium                                               | 0.002639729 | GO:0061138 |
|  | GO:BP | tube morphogenesis                                                                    | 0.002788673 | GO:0035239 |
|  | GO:BP | regulation of catalytic activity                                                      | 0.002788673 | GO:0050790 |
|  | GO:BP | cell development                                                                      | 0.002788673 | GO:0048468 |
|  | GO:BP | renal tubule development                                                              | 0.002807325 | GO:0061326 |
|  | GO:BP | regulation of anatomical structure morphogenesis                                      | 0.002827974 | GO:0022603 |
|  | GO:BP | gland morphogenesis                                                                   | 0.003013165 | GO:0022612 |
|  | GO:BP | positive regulation of intracellular signal transduction                              | 0.003103801 | GO:1902533 |



|  |       |                                                                              |             |            |
|--|-------|------------------------------------------------------------------------------|-------------|------------|
|  | GO:BP | gland development                                                            | 0.003172101 | GO:0048732 |
|  | GO:BP | signaling                                                                    | 0.003271767 | GO:0023052 |
|  | GO:BP | regulation of cell adhesion                                                  | 0.003447125 | GO:0030155 |
|  | GO:BP | cellular response to chemical stimulus                                       | 0.003458605 | GO:0070887 |
|  | GO:CC | cell leading edge                                                            | 0.003533082 | GO:0031252 |
|  | GO:CC | integrin complex                                                             | 0.003533082 | GO:0008305 |
|  | GO:CC | focal adhesion                                                               | 0.003533082 | GO:0005925 |
|  | GO:CC | cell-substrate junction                                                      | 0.003533082 | GO:0030055 |
|  | GO:BP | cellular response to external stimulus                                       | 0.003639237 | GO:0071496 |
|  | GO:BP | skin development                                                             | 0.003845341 | GO:0043588 |
|  | GO:BP | growth                                                                       | 0.003945238 | GO:0040007 |
|  | GO:BP | positive regulation of cell adhesion                                         | 0.003945238 | GO:0045785 |
|  | GO:BP | mesoderm formation                                                           | 0.003945238 | GO:0001707 |
|  | GO:BP | sensory organ morphogenesis                                                  | 0.003945238 | GO:0090596 |
|  | GO:BP | regulation of MAP kinase activity                                            | 0.003945238 | GO:0043405 |
|  | GO:BP | endoderm formation                                                           | 0.003945238 | GO:0001706 |
|  | GO:BP | cell surface receptor signaling pathway                                      | 0.003945238 | GO:0007166 |
|  | GO:BP | peptidyl-tyrosine dephosphorylation                                          | 0.003987744 | GO:0035335 |
|  | GO:BP | positive regulation of cell differentiation                                  | 0.003996443 | GO:0045597 |
|  | GO:BP | response to endogenous stimulus                                              | 0.00404587  | GO:0009719 |
|  | GO:BP | protein metabolic process                                                    | 0.00404587  | GO:0019538 |
|  | GO:BP | signal transduction in response to DNA damage                                | 0.004084204 | GO:0042770 |
|  | GO:BP | muscle cell migration                                                        | 0.004084204 | GO:0014812 |
|  | GO:BP | localization                                                                 | 0.004084204 | GO:0051179 |
|  | GO:BP | response to nutrient levels                                                  | 0.004098862 | GO:0031667 |
|  | GO:BP | regulation of DNA damage response, signal transduction by p53 class mediator | 0.004101738 | GO:0043516 |
|  | GO:BP | response to chemical                                                         | 0.004101738 | GO:0042221 |
|  | GO:BP | morphogenesis of an epithelium                                               | 0.00410566  | GO:0002009 |
|  | GO:BP | mesoderm morphogenesis                                                       | 0.00410566  | GO:0048332 |
|  | GO:BP | regulation of cellular component movement                                    | 0.00410566  | GO:0051270 |
|  | GO:BP | cellular protein metabolic process                                           | 0.004113559 | GO:0044267 |
|  | GO:BP | cellular response to nutrient levels                                         | 0.004212392 | GO:0031669 |
|  | GO:BP | chemotaxis                                                                   | 0.004311865 | GO:0006935 |
|  | GO:BP | signal transduction                                                          | 0.004311865 | GO:0007165 |
|  | GO:BP | response to growth factor                                                    | 0.004378519 | GO:0070848 |
|  | GO:BP | response to external stimulus                                                | 0.004378519 | GO:0009605 |
|  | GO:BP | taxis                                                                        | 0.004378519 | GO:0042330 |
|  | GO:BP | mesoderm development                                                         | 0.004378519 | GO:0007498 |
|  | GO:BP | developmental growth                                                         | 0.004403917 | GO:0048589 |
|  | GO:BP | cellular protein modification process                                        | 0.004403917 | GO:0006464 |
|  | GO:BP | protein modification process                                                 | 0.004403917 | GO:0036211 |

|  |       |                                                                                               |             |            |
|--|-------|-----------------------------------------------------------------------------------------------|-------------|------------|
|  | GO:BP | positive regulation of peptidase activity                                                     | 0.004406771 | GO:0010952 |
|  | GO:BP | negative regulation of phosphorylation                                                        | 0.004406771 | GO:0042326 |
|  | GO:BP | regulation of morphogenesis of a branching structure                                          | 0.004406771 | GO:0060688 |
|  | GO:BP | negative regulation of protein phosphorylation                                                | 0.004641324 | GO:0001933 |
|  | GO:BP | regulation of cell motility                                                                   | 0.004641324 | GO:2000145 |
|  | GO:BP | neuron differentiation                                                                        | 0.004935012 | GO:0030182 |
|  | GO:BP | regulation of localization                                                                    | 0.004935012 | GO:0032879 |
|  | GO:BP | cellular response to stimulus                                                                 | 0.00496081  | GO:0051716 |
|  | GO:BP | cellular response to fatty acid                                                               | 0.005088012 | GO:0071398 |
|  | GO:BP | positive regulation of catalytic activity                                                     | 0.005099597 | GO:0043085 |
|  | GO:BP | regulation of neurogenesis                                                                    | 0.005498566 | GO:0050767 |
|  | GO:BP | orthogonal dichotomous subdivision of terminal units involved in lung branching morphogenesis | 0.005508529 | GO:0060488 |
|  | GO:BP | lateral sprouting involved in lung morphogenesis                                              | 0.005508529 | GO:0060490 |
|  | GO:BP | planar dichotomous subdivision of terminal units involved in lung branching morphogenesis     | 0.005508529 | GO:0060489 |
|  | GO:CC | intracellular                                                                                 | 0.005564465 | GO:0005622 |
|  | GO:CC | protein complex involved in cell adhesion                                                     | 0.005564465 | GO:0098636 |
|  | GO:BP | regulation of cell population proliferation                                                   | 0.005715829 | GO:0042127 |
|  | GO:BP | regulation of phosphate metabolic process                                                     | 0.005749258 | GO:0019220 |
|  | GO:BP | nervous system development                                                                    | 0.005750228 | GO:0007399 |
|  | GO:BP | regulation of phosphorus metabolic process                                                    | 0.005750228 | GO:0051174 |
|  | GO:BP | mammary gland development                                                                     | 0.005852429 | GO:0030879 |
|  | GO:BP | regulation of locomotion                                                                      | 0.00588032  | GO:0040012 |
|  | GO:BP | cell-cell signaling                                                                           | 0.005882962 | GO:0007267 |
|  | GO:BP | plasma membrane bounded cell projection organization                                          | 0.006146066 | GO:0120036 |
|  | GO:MF | insulin-like growth factor binding                                                            | 0.006158957 | GO:0005520 |
|  | GO:MF | protein binding                                                                               | 0.006158957 | GO:0005515 |
|  | GO:MF | protein tyrosine/serine/threonine phosphatase activity                                        | 0.006158957 | GO:0008138 |
|  | GO:BP | proteoglycan biosynthetic process                                                             | 0.006732436 | GO:0030166 |
|  | GO:BP | hair follicle development                                                                     | 0.006762609 | GO:0001942 |
|  | GO:BP | regulation of protein phosphorylation                                                         | 0.006762609 | GO:0001932 |
|  | GO:BP | proteoglycan metabolic process                                                                | 0.006762609 | GO:0006029 |
|  | GO:BP | response to extracellular stimulus                                                            | 0.00689885  | GO:0009991 |
|  | GO:BP | plasma membrane bounded cell projection morphogenesis                                         | 0.007421939 | GO:0120039 |
|  | GO:BP | negative regulation of nitrogen compound metabolic process                                    | 0.007421939 | GO:0051172 |
|  | GO:BP | hair cycle process                                                                            | 0.007421939 | GO:0022405 |
|  | GO:BP | macromolecule modification                                                                    | 0.007421939 | GO:0043412 |
|  | GO:BP | skin epidermis development                                                                    | 0.007421939 | GO:0098773 |
|  | GO:BP | molting cycle process                                                                         | 0.007421939 | GO:0022404 |
|  | GO:BP | response to fatty acid                                                                        | 0.007421939 | GO:0070542 |
|  | GO:BP | desmosome organization                                                                        | 0.007609626 | GO:0002934 |

|  |       |                                                                      |             |            |
|--|-------|----------------------------------------------------------------------|-------------|------------|
|  | GO:BP | smooth muscle cell migration                                         | 0.007853358 | GO:0014909 |
|  | GO:BP | cell projection morphogenesis                                        | 0.007894658 | GO:0048858 |
|  | GO:BP | camera-type eye morphogenesis                                        | 0.008129456 | GO:0048593 |
|  | GO:CC | synapse                                                              | 0.00851409  | GO:0045202 |
|  | GO:CC | intrinsic component of plasma membrane                               | 0.00851409  | GO:0031226 |
|  | GO:CC | basolateral plasma membrane                                          | 0.00851409  | GO:0016323 |
|  | GO:BP | regulation of cell development                                       | 0.008644407 | GO:0060284 |
|  | GO:BP | response to stimulus                                                 | 0.008644989 | GO:0050896 |
|  | GO:BP | regulation of synapse organization                                   | 0.009566781 | GO:0050807 |
|  | GO:BP | positive regulation of protein modification process                  | 0.009566781 | GO:0031401 |
|  | GO:BP | epidermis development                                                | 0.009575339 | GO:0008544 |
|  | GO:BP | cellular response to extracellular stimulus                          | 0.009575339 | GO:0031668 |
|  | GO:BP | skin morphogenesis                                                   | 0.009826302 | GO:0043589 |
|  | GO:BP | cell population proliferation                                        | 0.010161266 | GO:0008283 |
|  | GO:BP | cellular response to endogenous stimulus                             | 0.010249488 | GO:0071495 |
|  | GO:MF | protein tyrosine phosphatase activity                                | 0.010688876 | GO:0004725 |
|  | GO:MF | cell adhesion molecule binding                                       | 0.010688876 | GO:0050839 |
|  | GO:CC | integral component of plasma membrane                                | 0.010881537 | GO:0005887 |
|  | GO:CC | intracellular organelle                                              | 0.010881537 | GO:0043229 |
|  | GO:CC | cell-cell junction                                                   | 0.010881537 | GO:0005911 |
|  | GO:BP | cell part morphogenesis                                              | 0.010981342 | GO:0032990 |
|  | GO:BP | cellular response to organic substance                               | 0.011236528 | GO:0071310 |
|  | GO:BP | organonitrogen compound metabolic process                            | 0.011315349 | GO:1901564 |
|  | GO:BP | mammary gland morphogenesis                                          | 0.011458487 | GO:0060443 |
|  | GO:BP | response to acid chemical                                            | 0.011717747 | GO:0001101 |
|  | GO:BP | neuron projection development                                        | 0.012064579 | GO:0031175 |
|  | GO:BP | regulation of phosphorylation                                        | 0.012064579 | GO:0042325 |
|  | GO:BP | regionalization                                                      | 0.012206893 | GO:0003002 |
|  | GO:BP | axon development                                                     | 0.012215775 | GO:0061564 |
|  | GO:BP | axonogenesis                                                         | 0.012462352 | GO:0007409 |
|  | GO:BP | mammary gland epithelium development                                 | 0.01249355  | GO:0061180 |
|  | GO:BP | neuron projection morphogenesis                                      | 0.012555446 | GO:0048812 |
|  | GO:BP | dichotomous subdivision of terminal units involved in lung branching | 0.012802554 | GO:0060448 |
|  | GO:BP | regulation of synapse structure or activity                          | 0.012926069 | GO:0050803 |
|  | GO:BP | aortic valve morphogenesis                                           | 0.01300305  | GO:0003180 |
|  | GO:BP | nephron tubule morphogenesis                                         | 0.013124158 | GO:0072078 |
|  | GO:BP | phosphorylation                                                      | 0.013235083 | GO:0016310 |
|  | GO:BP | inner ear development                                                | 0.013268978 | GO:0048839 |
|  | GO:BP | developmental growth involved in morphogenesis                       | 0.01351172  | GO:0060560 |
|  | GO:BP | mesenchyme development                                               | 0.01351172  | GO:0060485 |
|  | GO:BP | positive regulation of signal transduction                           | 0.01405536  | GO:0009967 |
|  | GO:BP | substrate-dependent cell migration                                   | 0.014443451 | GO:0006929 |

|  |       |                                                                 |             |            |
|--|-------|-----------------------------------------------------------------|-------------|------------|
|  | GO:BP | negative regulation of ERK1 and ERK2 cascade                    | 0.014469026 | GO:0070373 |
|  | GO:BP | lateral sprouting from an epithelium                            | 0.014469026 | GO:0060601 |
|  | GO:BP | nephron epithelium morphogenesis                                | 0.014469026 | GO:0072088 |
|  | GO:BP | white fat cell differentiation                                  | 0.014469026 | GO:0050872 |
|  | GO:BP | regulation of neuron differentiation                            | 0.014469026 | GO:0045664 |
|  | GO:BP | intrinsic apoptotic signaling pathway in response to DNA damage | 0.014469026 | GO:0008630 |
|  | GO:BP | cranial nerve development                                       | 0.014852713 | GO:0021545 |
|  | GO:BP | positive regulation of proteolysis                              | 0.014852713 | GO:0045862 |
|  | GO:CC | laminin-5 complex                                               | 0.015496016 | GO:0005610 |
|  | GO:MF | transcription corepressor activity                              | 0.015592739 | GO:0003714 |
|  | GO:MF | growth factor binding                                           | 0.015592739 | GO:0019838 |
|  | GO:BP | cranial nerve morphogenesis                                     | 0.01576619  | GO:0021602 |
|  | GO:BP | regulation of nitrogen compound metabolic process               | 0.01576619  | GO:0051171 |
|  | GO:BP | renal tubule morphogenesis                                      | 0.016019656 | GO:0061333 |
|  | GO:BP | nephron morphogenesis                                           | 0.016019656 | GO:0072028 |
|  | GO:BP | multicellular organismal process                                | 0.016484383 | GO:0032501 |
|  | GO:BP | protein deacylation                                             | 0.016521529 | GO:0035601 |
|  | GO:BP | negative regulation of protein metabolic process                | 0.016610686 | GO:0051248 |
|  | GO:BP | negative regulation of phosphate metabolic process              | 0.01672936  | GO:0045936 |
|  | GO:BP | negative regulation of intracellular signal transduction        | 0.01672936  | GO:1902532 |
|  | GO:BP | response to organic cyclic compound                             | 0.016876345 | GO:0014070 |
|  | GO:BP | negative regulation of phosphorus metabolic process             | 0.016876345 | GO:0010563 |
|  | GO:BP | cellular response to cAMP                                       | 0.016876345 | GO:0071320 |
|  | GO:BP | integrin-mediated signaling pathway                             | 0.016940696 | GO:0007229 |
|  | GO:BP | positive regulation of cellular component movement              | 0.017377691 | GO:0051272 |
|  | GO:BP | negative regulation of MAP kinase activity                      | 0.017481227 | GO:0043407 |
|  | GO:BP | macromolecule deacylation                                       | 0.017659191 | GO:0098732 |
|  | GO:BP | neural crest cell migration                                     | 0.017982974 | GO:0001755 |
|  | GO:BP | positive regulation of cell death                               | 0.018267513 | GO:0010942 |
|  | GO:BP | positive regulation of cell migration                           | 0.018624538 | GO:0030335 |
|  | GO:BP | regulation of cell-substrate adhesion                           | 0.018624538 | GO:0010810 |
|  | GO:BP | heparan sulfate proteoglycan metabolic process                  | 0.018624538 | GO:0030201 |
|  | GO:BP | aortic valve development                                        | 0.018624538 | GO:0003176 |
|  | GO:BP | intrinsic apoptotic signaling pathway                           | 0.018961582 | GO:0097193 |
|  | GO:BP | epithelial cell development                                     | 0.018961582 | GO:0002064 |
|  | GO:BP | regulation of MAPK cascade                                      | 0.019270698 | GO:0043408 |
|  | GO:BP | negative regulation of cellular metabolic process               | 0.019270698 | GO:0031324 |
|  | GO:BP | cell junction organization                                      | 0.01927526  | GO:0034330 |
|  | GO:BP | regulation of signal transduction by p53 class mediator         | 0.019387307 | GO:1901796 |
|  | GO:BP | regulation of animal organ morphogenesis                        | 0.019387307 | GO:2000027 |
|  | GO:BP | cell morphogenesis involved in neuron differentiation           | 0.019394273 | GO:0048667 |
|  | GO:BP | hair cycle                                                      | 0.019411319 | GO:0042633 |

|  |       |                                                                                                                 |             |            |
|--|-------|-----------------------------------------------------------------------------------------------------------------|-------------|------------|
|  | GO:BP | molting cycle                                                                                                   | 0.019411319 | GO:0042303 |
|  | GO:BP | mesenchymal cell differentiation                                                                                | 0.019547629 | GO:0048762 |
|  | GO:BP | ameboidal-type cell migration                                                                                   | 0.019547629 | GO:0001667 |
|  | GO:BP | cell surface receptor signaling pathway involved in heart development                                           | 0.019768184 | GO:0061311 |
|  | GO:BP | regulation of protein serine/threonine kinase activity                                                          | 0.019768184 | GO:0071900 |
|  | GO:BP | regulation of regulatory T cell differentiation                                                                 | 0.019768184 | GO:0045589 |
|  | GO:BP | renal sodium ion absorption                                                                                     | 0.019897553 | GO:0070294 |
|  | GO:BP | establishment of body hair planar orientation                                                                   | 0.019897553 | GO:0048105 |
|  | GO:BP | frontal suture morphogenesis                                                                                    | 0.019897553 | GO:0060364 |
|  | GO:BP | establishment of body hair or bristle planar orientation                                                        | 0.019897553 | GO:0048104 |
|  | GO:BP | positive regulation of phosphorus metabolic process                                                             | 0.020001252 | GO:0010562 |
|  | GO:BP | positive regulation of phosphate metabolic process                                                              | 0.020001252 | GO:0045937 |
|  | GO:BP | negative regulation of developmental process                                                                    | 0.020333567 | GO:0051093 |
|  | GO:BP | cellular response to growth factor stimulus                                                                     | 0.020743676 | GO:0071363 |
|  | GO:BP | regulation of endopeptidase activity                                                                            | 0.021353027 | GO:0052548 |
|  | GO:BP | liver regeneration                                                                                              | 0.021353027 | GO:0097421 |
|  | GO:BP | regulation of hydrolase activity                                                                                | 0.022311377 | GO:0051336 |
|  | GO:BP | positive regulation of DNA damage response, signal transduction by p53 class mediator                           | 0.022311377 | GO:0043517 |
|  | GO:BP | peptidyl-threonine dephosphorylation                                                                            | 0.022311377 | GO:0035970 |
|  | GO:BP | renal absorption                                                                                                | 0.022311377 | GO:0070293 |
|  | GO:BP | negative regulation of MAPK cascade                                                                             | 0.022343131 | GO:0043409 |
|  | GO:BP | negative regulation of cellular protein metabolic process                                                       | 0.022497694 | GO:0032269 |
|  | GO:BP | branching morphogenesis of an epithelial tube                                                                   | 0.023076063 | GO:0048754 |
|  | GO:BP | phosphate-containing compound metabolic process                                                                 | 0.023076063 | GO:0006796 |
|  | GO:BP | regulation of JUN kinase activity                                                                               | 0.023168174 | GO:0043506 |
|  | GO:BP | response to nutrient                                                                                            | 0.023432809 | GO:0007584 |
|  | GO:BP | fat cell differentiation                                                                                        | 0.023432809 | GO:0045444 |
|  | GO:BP | eye morphogenesis                                                                                               | 0.023704447 | GO:0048592 |
|  | GO:BP | positive regulation of cysteine-type endopeptidase activity                                                     | 0.024535078 | GO:2001056 |
|  | GO:BP | morphogenesis of embryonic epithelium                                                                           | 0.024535078 | GO:0016331 |
|  | GO:BP | regulation of cell death                                                                                        | 0.024911814 | GO:0010941 |
|  | GO:BP | positive regulation of cell motility                                                                            | 0.024938381 | GO:2000147 |
|  | GO:BP | ear development                                                                                                 | 0.024938381 | GO:0043583 |
|  | GO:BP | neuron development                                                                                              | 0.024938381 | GO:0048666 |
|  | GO:BP | regulation of primary metabolic process                                                                         | 0.024938381 | GO:0080090 |
|  | GO:BP | cell death                                                                                                      | 0.024938381 | GO:0008219 |
|  | GO:BP | regulatory T cell differentiation                                                                               | 0.024938381 | GO:0045066 |
|  | GO:BP | preganglionic parasympathetic fiber development                                                                 | 0.024938381 | GO:0021783 |
|  | GO:BP | DNA damage response, signal transduction by p53 class mediator resulting in transcription of p21 class mediator | 0.024938381 | GO:0006978 |
|  | GO:BP | regulation of mammary gland epithelial cell proliferation                                                       | 0.024938381 | GO:0033599 |

|  |       |                                                                      |             |            |
|--|-------|----------------------------------------------------------------------|-------------|------------|
|  | GO:MF | kinase binding                                                       | 0.025041354 | GO:0019900 |
|  | GO:MF | enzyme binding                                                       | 0.025341075 | GO:0019899 |
|  | GO:BP | negative regulation of protein modification process                  | 0.02597985  | GO:0031400 |
|  | GO:BP | negative regulation of cellular process                              | 0.026036753 | GO:0048523 |
|  | GO:CC | insulin-like growth factor ternary complex                           | 0.026325337 | GO:0042567 |
|  | GO:CC | alphav-beta3 integrin-IGF-1-IGF1R complex                            | 0.026325337 | GO:0035867 |
|  | GO:CC | integral component of presynaptic active zone membrane               | 0.026325337 | GO:0099059 |
|  | GO:BP | MAPK cascade                                                         | 0.026328557 | GO:0000165 |
|  | GO:BP | epithelial cell differentiation                                      | 0.026348063 | GO:0030855 |
|  | GO:BP | phosphorus metabolic process                                         | 0.026348063 | GO:0006793 |
|  | GO:BP | semi-lunar valve development                                         | 0.026355989 | GO:1905314 |
|  | GO:BP | positive regulation of hemopoiesis                                   | 0.026355989 | GO:1903708 |
|  | GO:BP | response to vitamin D                                                | 0.026355989 | GO:0033280 |
|  | GO:BP | regulation of cell-matrix adhesion                                   | 0.026775326 | GO:0001952 |
|  | GO:BP | glycosaminoglycan metabolic process                                  | 0.026940717 | GO:0030203 |
|  | GO:BP | pattern specification process                                        | 0.026940717 | GO:0007389 |
|  | GO:BP | ossification                                                         | 0.027353027 | GO:0001503 |
|  | GO:BP | microglia differentiation                                            | 0.027353027 | GO:0014004 |
|  | GO:BP | positive regulation of transferase activity                          | 0.027353027 | GO:0051347 |
|  | GO:BP | semaphorin-plexin signaling pathway                                  | 0.027353027 | GO:0071526 |
|  | GO:BP | apoptotic process                                                    | 0.027353027 | GO:0006915 |
|  | GO:BP | trigeminal ganglion development                                      | 0.027353027 | GO:0061551 |
|  | GO:BP | regulation of branching involved in mammary gland duct morphogenesis | 0.027353027 | GO:0060762 |
|  | GO:BP | epithelial cell proliferation                                        | 0.027353027 | GO:0050673 |
|  | GO:BP | regulation of epithelial tube formation                              | 0.027353027 | GO:1905276 |
|  | GO:BP | cellular response to glucose starvation                              | 0.027353027 | GO:0042149 |
|  | GO:BP | substrate-dependent cerebral cortex tangential migration             | 0.027353027 | GO:0021825 |
|  | GO:BP | positive regulation of phosphorylation                               | 0.027353027 | GO:0042327 |
|  | GO:BP | cell migration involved in kidney development                        | 0.027353027 | GO:0035787 |
|  | GO:BP | odontogenesis of dentin-containing tooth                             | 0.027353027 | GO:0042475 |
|  | GO:BP | DNA damage response, signal transduction resulting in transcription  | 0.027353027 | GO:0042772 |
|  | GO:BP | regulation of apoptotic process                                      | 0.027353027 | GO:0042981 |
|  | GO:BP | positive regulation of apoptotic process                             | 0.027353027 | GO:0043065 |
|  | GO:BP | negative regulation of response to wounding                          | 0.028240025 | GO:1903035 |
|  | GO:CC | apical part of cell                                                  | 0.028593876 | GO:0045177 |
|  | GO:BP | platelet degranulation                                               | 0.02876038  | GO:0002576 |
|  | GO:BP | positive regulation of cell communication                            | 0.02897467  | GO:0010647 |
|  | GO:BP | regulation of cellular protein localization                          | 0.029202612 | GO:1903827 |
|  | GO:BP | insulin-like growth factor receptor signaling pathway                | 0.029692355 | GO:0048009 |
|  | GO:BP | positive regulation of programmed cell death                         | 0.030057413 | GO:0043068 |
|  | GO:MF | fibronectin binding                                                  | 0.030135768 | GO:0001968 |
|  | GO:CC | insulin-like growth factor binding protein complex                   | 0.030436575 | GO:0016942 |

|  |       |                                                         |             |            |
|--|-------|---------------------------------------------------------|-------------|------------|
|  | GO:CC | insulin receptor complex                                | 0.030436575 | GO:0005899 |
|  | GO:CC | filopodium membrane                                     | 0.030436575 | GO:0031527 |
|  | GO:CC | growth factor complex                                   | 0.030436575 | GO:0036454 |
|  | GO:CC | membrane-enclosed lumen                                 | 0.030436575 | GO:0031974 |
|  | GO:CC | collagen-containing extracellular matrix                | 0.030436575 | GO:0062023 |
|  | GO:CC | intracellular organelle lumen                           | 0.030436575 | GO:0070013 |
|  | GO:CC | organelle lumen                                         | 0.030436575 | GO:0043233 |
|  | GO:BP | regulation of protein kinase activity                   | 0.03058132  | GO:0045859 |
|  | GO:BP | positive regulation of signaling                        | 0.03058132  | GO:0023056 |
|  | GO:BP | signal transduction by protein phosphorylation          | 0.03058132  | GO:0023014 |
|  | GO:BP | regulation of DNA binding                               | 0.030610563 | GO:0051101 |
|  | GO:BP | response to vitamin                                     | 0.030610563 | GO:0033273 |
|  | GO:BP | negative regulation of protein kinase activity          | 0.030612678 | GO:0006469 |
|  | GO:BP | parasympathetic nervous system development              | 0.030612678 | GO:0048486 |
|  | GO:BP | response to wounding                                    | 0.030837461 | GO:0009611 |
|  | GO:BP | regulation of peptidase activity                        | 0.031454655 | GO:0052547 |
|  | GO:BP | regulation of cell projection organization              | 0.031493085 | GO:0031344 |
|  | GO:BP | ureteric bud morphogenesis                              | 0.031493085 | GO:0060675 |
|  | GO:BP | cranial skeletal system development                     | 0.031493085 | GO:1904888 |
|  | GO:BP | response to ketone                                      | 0.031611128 | GO:1901654 |
|  | GO:BP | respiratory system development                          | 0.031611128 | GO:0060541 |
|  | GO:BP | regulation of transferase activity                      | 0.03186139  | GO:0051338 |
|  | GO:BP | regulation of kinase activity                           | 0.03186139  | GO:0043549 |
|  | GO:BP | programmed cell death                                   | 0.032065744 | GO:0012501 |
|  | GO:CC | intrinsic component of presynaptic active zone membrane | 0.032688029 | GO:0098945 |
|  | GO:CC | apical plasma membrane                                  | 0.032688029 | GO:0016324 |
|  | GO:CC | membrane-bounded organelle                              | 0.032874203 | GO:0043227 |
|  | GO:BP | mesonephric tubule morphogenesis                        | 0.032971937 | GO:0072171 |
|  | GO:BP | protein dephosphorylation                               | 0.032971937 | GO:0006470 |
|  | GO:BP | regulation of cysteine-type endopeptidase activity      | 0.033218015 | GO:2000116 |
|  | GO:BP | endothelium development                                 | 0.033307053 | GO:0003158 |
|  | GO:CC | basement membrane                                       | 0.033367357 | GO:0005604 |
|  | GO:BP | positive regulation of cellular protein localization    | 0.033402583 | GO:1903829 |
|  | GO:BP | enzyme linked receptor protein signaling pathway        | 0.033402583 | GO:0007167 |
|  | GO:BP | regulation of programmed cell death                     | 0.033402583 | GO:0043067 |
|  | GO:CC | organelle                                               | 0.033413348 | GO:0043226 |
|  | GO:BP | protein deacetylation                                   | 0.033715243 | GO:0006476 |
|  | GO:BP | regulation of ossification                              | 0.033719072 | GO:0030278 |
|  | GO:BP | cell-substrate junction organization                    | 0.034701111 | GO:0150115 |
|  | GO:BP | regulation of cellular response to stress               | 0.034701111 | GO:0080135 |
|  | GO:BP | positive regulation of kinase activity                  | 0.034701111 | GO:0033674 |
|  | GO:BP | ureteric bud development                                | 0.034701111 | GO:0001657 |

|  |       |                                                           |             |            |
|--|-------|-----------------------------------------------------------|-------------|------------|
|  | GO:BP | positive regulation of locomotion                         | 0.034701111 | GO:0040017 |
|  | GO:BP | substrate adhesion-dependent cell spreading               | 0.034701111 | GO:0034446 |
|  | GO:BP | cell-substrate junction assembly                          | 0.034701111 | GO:0007044 |
|  | GO:BP | cranial ganglion development                              | 0.035130889 | GO:0061550 |
|  | GO:BP | regulation of microvillus assembly                        | 0.035130889 | GO:0032534 |
|  | GO:BP | extracellular matrix assembly                             | 0.035130889 | GO:0085029 |
|  | GO:BP | regulation of heart morphogenesis                         | 0.035130889 | GO:2000826 |
|  | GO:BP | aminoglycan metabolic process                             | 0.035130889 | GO:0006022 |
|  | GO:BP | negative regulation of cell differentiation               | 0.035130889 | GO:0045596 |
|  | GO:BP | renal sodium ion transport                                | 0.035130889 | GO:0003096 |
|  | GO:BP | positive regulation of receptor clustering                | 0.035130889 | GO:1903911 |
|  | GO:BP | response to dexamethasone                                 | 0.035130889 | GO:0071548 |
|  | GO:BP | regeneration                                              | 0.035290815 | GO:0031099 |
|  | GO:BP | response to organonitrogen compound                       | 0.035290815 | GO:0010243 |
|  | GO:BP | mesonephric tubule development                            | 0.035290815 | GO:0072164 |
|  | GO:BP | mesonephric epithelium development                        | 0.035290815 | GO:0072163 |
|  | GO:BP | positive regulation of protein phosphorylation            | 0.035646473 | GO:0001934 |
|  | GO:BP | myeloid cell differentiation                              | 0.035680871 | GO:0030099 |
|  | GO:BP | negative regulation of transcription by RNA polymerase II | 0.035680871 | GO:0000122 |
|  | GO:CC | intracellular membrane-bounded organelle                  | 0.036679203 | GO:0043231 |
|  | GO:BP | myeloid cell development                                  | 0.036706295 | GO:0061515 |
|  | GO:BP | positive regulation of protein acetylation                | 0.036865096 | GO:1901985 |
|  | GO:BP | postsynapse organization                                  | 0.037907298 | GO:0099173 |
|  | GO:BP | regulation of macromolecule metabolic process             | 0.037907298 | GO:0060255 |
|  | GO:BP | artery development                                        | 0.038089842 | GO:0060840 |
|  | GO:BP | cell adhesion mediated by integrin                        | 0.038539152 | GO:0033627 |
|  | GO:BP | cellular response to lipid                                | 0.038903248 | GO:0071396 |
|  | GO:BP | autonomic nervous system development                      | 0.0394929   | GO:0048483 |
|  | GO:BP | Wnt signaling pathway                                     | 0.039501241 | GO:0016055 |
|  | GO:BP | negative regulation of growth                             | 0.039723357 | GO:0045926 |
|  | GO:BP | JNK cascade                                               | 0.039723357 | GO:0007254 |
|  | GO:BP | positive regulation of JUN kinase activity                | 0.040325264 | GO:0043507 |
|  | GO:BP | retina layer formation                                    | 0.040488532 | GO:0010842 |
|  | GO:BP | cell-cell signaling by wnt                                | 0.040488532 | GO:0198738 |
|  | GO:BP | cellular response to acid chemical                        | 0.040508403 | GO:0071229 |
|  | GO:BP | mesonephros development                                   | 0.04057616  | GO:0001823 |
|  | GO:BP | inner ear morphogenesis                                   | 0.04057616  | GO:0042472 |
|  | GO:BP | negative regulation of macromolecule metabolic process    | 0.04057616  | GO:0010605 |
|  | GO:BP | response to organophosphorus                              | 0.04090829  | GO:0046683 |
|  | GO:BP | endodermal cell differentiation                           | 0.041388298 | GO:0035987 |
|  | GO:BP | regulation of cellular metabolic process                  | 0.041388298 | GO:0031323 |
|  | GO:BP | establishment of endothelial barrier                      | 0.041388298 | GO:0061028 |



|  |       |                                                                  |             |            |
|--|-------|------------------------------------------------------------------|-------------|------------|
|  | GO:BP | lung development                                                 | 0.041515148 | GO:0030324 |
|  | GO:BP | blood vessel development                                         | 0.041828959 | GO:0001568 |
|  | GO:CC | filopodium                                                       | 0.043333421 | GO:0030175 |
|  | GO:MF | integrin binding                                                 | 0.043597122 | GO:0005178 |
|  | GO:BP | wound healing                                                    | 0.043779697 | GO:0042060 |
|  | GO:BP | positive regulation of signal transduction by p53 class mediator | 0.044292733 | GO:1901798 |
|  | GO:BP | urea transmembrane transport                                     | 0.044292733 | GO:0071918 |
|  | GO:BP | response to stress                                               | 0.044292733 | GO:0006950 |
|  | GO:BP | branching involved in salivary gland morphogenesis               | 0.044292733 | GO:0060445 |
|  | GO:BP | lens morphogenesis in camera-type eye                            | 0.044292733 | GO:0002089 |
|  | GO:BP | regulation of synapse assembly                                   | 0.045208554 | GO:0051963 |
|  | GO:BP | negative regulation of kinase activity                           | 0.045418326 | GO:0033673 |
|  | GO:BP | response to nitrogen compound                                    | 0.045418326 | GO:1901698 |
|  | GO:BP | positive regulation of MAP kinase activity                       | 0.045418326 | GO:0043406 |
|  | GO:BP | cellular response to nutrient                                    | 0.045431102 | GO:0031670 |
|  | GO:BP | respiratory tube development                                     | 0.04602601  | GO:0030323 |
|  | GO:BP | regulation of protein deacetylation                              | 0.046628103 | GO:0090311 |
|  | GO:BP | glycosaminoglycan biosynthetic process                           | 0.046628103 | GO:0006024 |
|  | GO:BP | transmembrane receptor protein tyrosine kinase signaling pathway | 0.048003921 | GO:0007169 |
|  | GO:BP | regulation of proteolysis                                        | 0.048577673 | GO:0030162 |
|  | GO:BP | regulation of morphogenesis of an epithelium                     | 0.048577673 | GO:1905330 |
|  | GO:BP | osteoblast differentiation                                       | 0.049576537 | GO:0001649 |
|  | GO:BP | regulation of JNK cascade                                        | 0.049831639 | GO:0046328 |
|  | GO:BP | animal organ regeneration                                        | 0.049831639 | GO:0031100 |
|  | KEGG  | PI3K-Akt signaling pathway                                       | 6.71621E-07 | 04151      |
|  | KEGG  | Proteoglycans in cancer                                          | 4.40632E-05 | 05205      |
|  | KEGG  | Human papillomavirus infection                                   | 4.40632E-05 | 05165      |
|  | KEGG  | ECM-receptor interaction                                         | 5.22374E-05 | 04512      |
|  | KEGG  | FoxO signaling pathway                                           | 5.22374E-05 | 04068      |
|  | KEGG  | MAPK signaling pathway                                           | 5.22374E-05 | 04010      |
|  | KEGG  | MicroRNAs in cancer                                              | 7.11452E-05 | 05206      |
|  | KEGG  | Pathways in cancer                                               | 7.27234E-05 | 05200      |
|  | KEGG  | Focal adhesion                                                   | 7.27234E-05 | 04510      |
|  | KEGG  | Axon guidance                                                    | 0.000276399 | 04360      |
|  | KEGG  | Transcriptional misregulation in cancer                          | 0.000303578 | 05202      |
|  | KEGG  | Hypertrophic cardiomyopathy (HCM)                                | 0.000326172 | 05410      |
|  | KEGG  | Regulation of actin cytoskeleton                                 | 0.004282057 | 04810      |
|  | KEGG  | Dilated cardiomyopathy (DCM)                                     | 0.004282057 | 05414      |
|  | KEGG  | Hippo signaling pathway                                          | 0.00443507  | 04390      |
|  | KEGG  | AMPK signaling pathway                                           | 0.009952162 | 04152      |
|  | KEGG  | Arrhythmogenic right ventricular cardiomyopathy (ARVC)           | 0.014087021 | 05412      |
|  | KEGG  | Apoptosis                                                        | 0.014087021 | 04210      |

|                                          |               |                                               |             |                |
|------------------------------------------|---------------|-----------------------------------------------|-------------|----------------|
|                                          | KEGG          | Autophagy - animal                            | 0.014087021 | 04140          |
|                                          | KEGG          | Apelin signaling pathway                      | 0.014087021 | 04371          |
|                                          | KEGG          | Fluid shear stress and atherosclerosis        | 0.014273056 | 05418          |
|                                          | KEGG          | Rap1 signaling pathway                        | 0.014494993 | 04015          |
|                                          | KEGG          | mTOR signaling pathway                        | 0.019579919 | 04150          |
|                                          | KEGG          | Small cell lung cancer                        | 0.019603048 | 05222          |
|                                          | KEGG          | Wnt signaling pathway                         | 0.021739003 | 04310          |
|                                          | KEGG          | Prostate cancer                               | 0.021760444 | 05215          |
|                                          | KEGG          | Tight junction                                | 0.025290339 | 04530          |
|                                          | KEGG          | Toxoplasmosis                                 | 0.033195282 | 05145          |
| <b>K20-only vs double-high</b>           |               |                                               |             |                |
| <b>Upregulated in the K20-only group</b> | <b>Source</b> | <b>Terms</b>                                  | <b>FDR</b>  | <b>Term ID</b> |
|                                          | GO:CC         | intracellular membrane-bounded organelle      | 4.1289E-08  | GO:0043231     |
|                                          | GO:CC         | membrane-bounded organelle                    | 1.75618E-06 | GO:0043227     |
|                                          | GO:CC         | chromosome                                    | 3.14643E-06 | GO:0005694     |
|                                          | GO:CC         | organelle                                     | 7.13081E-06 | GO:0043226     |
|                                          | GO:CC         | cytoplasm                                     | 8.30967E-06 | GO:0005737     |
|                                          | GO:CC         | intracellular organelle                       | 8.44585E-06 | GO:0043229     |
|                                          | GO:CC         | non-membrane-bounded organelle                | 1.20368E-05 | GO:0043228     |
|                                          | GO:CC         | intracellular                                 | 1.44797E-05 | GO:0005622     |
|                                          | GO:CC         | organelle lumen                               | 1.44797E-05 | GO:0043233     |
|                                          | GO:CC         | intracellular non-membrane-bounded organelle  | 1.44797E-05 | GO:0043232     |
|                                          | GO:CC         | intracellular organelle lumen                 | 1.44797E-05 | GO:0070013     |
|                                          | GO:CC         | membrane-enclosed lumen                       | 1.44797E-05 | GO:0031974     |
|                                          | GO:CC         | nucleoplasm                                   | 4.83269E-05 | GO:0005654     |
|                                          | GO:BP         | organelle organization                        | 6.49236E-05 | GO:0006996     |
|                                          | GO:CC         | nuclear lumen                                 | 0.000121879 | GO:0031981     |
|                                          | GO:BP         | cell cycle                                    | 0.000149184 | GO:0007049     |
|                                          | GO:BP         | chromosome organization                       | 0.000149184 | GO:0051276     |
|                                          | GO:BP         | mitotic cell cycle                            | 0.000149184 | GO:0000278     |
|                                          | GO:CC         | nucleus                                       | 0.000200963 | GO:0005634     |
|                                          | GO:MF         | nucleotide binding                            | 0.000485574 | GO:0000166     |
|                                          | GO:MF         | nucleoside phosphate binding                  | 0.000485574 | GO:1901265     |
|                                          | GO:BP         | cellular component organization or biogenesis | 0.000555988 | GO:0071840     |
|                                          | GO:BP         | cellular component organization               | 0.000555988 | GO:0016043     |
|                                          | GO:CC         | DNA packaging complex                         | 0.00061003  | GO:0044815     |
|                                          | GO:CC         | nuclear lamina                                | 0.00061003  | GO:0005652     |
|                                          | GO:CC         | microtubule cytoskeleton                      | 0.00061003  | GO:0015630     |
|                                          | GO:BP         | DNA packaging                                 | 0.000637039 | GO:0006323     |
|                                          | GO:BP         | cell division                                 | 0.000716599 | GO:0051301     |
|                                          | GO:BP         | mitotic cell cycle process                    | 0.000718505 | GO:1903047     |
|                                          | GO:BP         | DNA replication                               | 0.000743307 | GO:0006260     |

|  |       |                                                                |             |            |
|--|-------|----------------------------------------------------------------|-------------|------------|
|  | GO:BP | DNA metabolic process                                          | 0.000743307 | GO:0006259 |
|  | GO:BP | nucleosome assembly                                            | 0.000818422 | GO:0006334 |
|  | GO:BP | nuclear DNA replication                                        | 0.001124001 | GO:0033260 |
|  | GO:BP | DNA conformation change                                        | 0.001124001 | GO:0071103 |
|  | GO:CC | chromosomal region                                             | 0.001145384 | GO:0098687 |
|  | GO:CC | condensed chromosome                                           | 0.001145384 | GO:0000793 |
|  | GO:CC | nucleosome                                                     | 0.001814486 | GO:0000786 |
|  | GO:BP | cell cycle DNA replication                                     | 0.001957256 | GO:0044786 |
|  | GO:BP | cell cycle process                                             | 0.002050262 | GO:0022402 |
|  | GO:BP | G1/S transition of mitotic cell cycle                          | 0.002057291 | GO:0000082 |
|  | GO:BP | chromatin assembly                                             | 0.002180458 | GO:0031497 |
|  | GO:BP | sister chromatid segregation                                   | 0.002180458 | GO:0000819 |
|  | GO:CC | chromatin                                                      | 0.002503053 | GO:0000785 |
|  | GO:CC | protein-DNA complex                                            | 0.002644973 | GO:0032993 |
|  | GO:CC | microtubule                                                    | 0.003023902 | GO:0005874 |
|  | GO:CC | cytosol                                                        | 0.003703648 | GO:0005829 |
|  | GO:CC | spindle                                                        | 0.004007485 | GO:0005819 |
|  | GO:BP | cell cycle G1/S phase transition                               | 0.004705247 | GO:0044843 |
|  | GO:MF | small molecule binding                                         | 0.00595397  | GO:0036094 |
|  | GO:BP | regulation of cellular response to heat                        | 0.006731341 | GO:1900034 |
|  | GO:BP | nucleosome organization                                        | 0.006739739 | GO:0034728 |
|  | GO:CC | endomembrane system                                            | 0.007191631 | GO:0012505 |
|  | GO:BP | cellular response to heat                                      | 0.007254042 | GO:0034605 |
|  | GO:BP | chromatin assembly or disassembly                              | 0.00762799  | GO:0006333 |
|  | GO:CC | cytoskeleton                                                   | 0.00853424  | GO:0005856 |
|  | GO:BP | inner cell mass cell proliferation                             | 0.009064151 | GO:0001833 |
|  | GO:CC | apical part of cell                                            | 0.010534337 | GO:0045177 |
|  | GO:BP | mitotic cell cycle phase transition                            | 0.011873487 | GO:0044772 |
|  | GO:CC | clathrin-coated pit                                            | 0.012403801 | GO:0005905 |
|  | GO:BP | response to heat                                               | 0.013181646 | GO:0009408 |
|  | GO:BP | nuclear chromosome segregation                                 | 0.013181646 | GO:0098813 |
|  | GO:BP | mitotic nuclear division                                       | 0.014903912 | GO:0140014 |
|  | GO:BP | cellular response to DNA damage stimulus                       | 0.015714112 | GO:0006974 |
|  | GO:BP | nuclear division                                               | 0.015714112 | GO:0000280 |
|  | GO:CC | cytoplasmic microtubule                                        | 0.016277144 | GO:0005881 |
|  | GO:BP | DNA-dependent DNA replication                                  | 0.018285705 | GO:0006261 |
|  | GO:BP | regulation of gene silencing                                   | 0.018285705 | GO:0060968 |
|  | GO:BP | chromatin organization involved in regulation of transcription | 0.018285705 | GO:0034401 |
|  | GO:BP | regulation of mitotic cell cycle                               | 0.018498469 | GO:0007346 |
|  | GO:MF | anion binding                                                  | 0.018707973 | GO:0043168 |
|  | GO:MF | purine ribonucleotide binding                                  | 0.018707973 | GO:0032555 |
|  | GO:MF | ribonucleotide binding                                         | 0.018707973 | GO:0032553 |

|  |       |                                                                         |             |            |
|--|-------|-------------------------------------------------------------------------|-------------|------------|
|  | GO:MF | purine nucleotide binding                                               | 0.018707973 | GO:0017076 |
|  | GO:MF | protein binding                                                         | 0.018707973 | GO:0005515 |
|  | GO:CC | spindle pole                                                            | 0.019744383 | GO:0000922 |
|  | GO:CC | chromosome, centromeric region                                          | 0.019744383 | GO:0000775 |
|  | GO:CC | endolysosome membrane                                                   | 0.019744383 | GO:0036020 |
|  | GO:CC | envelope                                                                | 0.019744383 | GO:0031975 |
|  | GO:CC | organelle envelope                                                      | 0.019744383 | GO:0031967 |
|  | GO:CC | nuclear envelope                                                        | 0.020040992 | GO:0005635 |
|  | GO:CC | condensed chromosome kinetochore                                        | 0.021132865 | GO:0000777 |
|  | GO:MF | leukotriene B4 receptor activity                                        | 0.02226105  | GO:0001632 |
|  | GO:MF | adenyl ribonucleotide binding                                           | 0.02226105  | GO:0032559 |
|  | GO:BP | mitotic sister chromatid segregation                                    | 0.022516454 | GO:0000070 |
|  | GO:MF | adenyl nucleotide binding                                               | 0.022915177 | GO:0030554 |
|  | GO:BP | cell cycle phase transition                                             | 0.023559223 | GO:0044770 |
|  | GO:BP | DNA recombination                                                       | 0.023559223 | GO:0006310 |
|  | GO:BP | chromosome segregation                                                  | 0.023559223 | GO:0007059 |
|  | GO:BP | protein-DNA complex assembly                                            | 0.023559223 | GO:0065004 |
|  | GO:CC | nuclear chromosome                                                      | 0.024661921 | GO:0000228 |
|  | GO:BP | blastocyst growth                                                       | 0.024842795 | GO:0001832 |
|  | GO:CC | kinesin complex                                                         | 0.02509537  | GO:0005871 |
|  | GO:CC | extracellular exosome                                                   | 0.027237753 | GO:0070062 |
|  | GO:MF | carbohydrate derivative binding                                         | 0.028668158 | GO:0097367 |
|  | GO:MF | clathrin adaptor activity                                               | 0.028668158 | GO:0035615 |
|  | GO:MF | purine ribonucleoside triphosphate binding                              | 0.028668158 | GO:0035639 |
|  | GO:CC | euchromatin                                                             | 0.030451239 | GO:0000791 |
|  | GO:CC | extracellular vesicle                                                   | 0.030451239 | GO:1903561 |
|  | GO:CC | extracellular organelle                                                 | 0.030451239 | GO:0043230 |
|  | GO:CC | lamin filament                                                          | 0.030451239 | GO:0005638 |
|  | GO:CC | basal plasma membrane                                                   | 0.030451239 | GO:0009925 |
|  | GO:CC | transcription export complex 2                                          | 0.030451239 | GO:0070390 |
|  | GO:CC | rDNA heterochromatin                                                    | 0.030451239 | GO:0033553 |
|  | GO:BP | cofactor metabolic process                                              | 0.030691006 | GO:0051186 |
|  | GO:CC | nuclear membrane                                                        | 0.031338261 | GO:0031965 |
|  | GO:CC | organelle membrane                                                      | 0.031786381 | GO:0031090 |
|  | GO:CC | condensed chromosome, centromeric region                                | 0.031786381 | GO:0000779 |
|  | GO:BP | negative regulation of mitotic cell cycle                               | 0.032174074 | GO:0045930 |
|  | GO:BP | chromatin organization involved in negative regulation of transcription | 0.034150984 | GO:0097549 |
|  | GO:BP | chromatin silencing                                                     | 0.034150984 | GO:0006342 |
|  | GO:BP | chromatin silencing at rDNA                                             | 0.034150984 | GO:0000183 |
|  | GO:BP | regulation of gene silencing by miRNA                                   | 0.034150984 | GO:0060964 |
|  | GO:BP | organelle fission                                                       | 0.034150984 | GO:0048285 |
|  | GO:BP | response to UV                                                          | 0.034150984 | GO:0009411 |

|                                             |               |                                                                     |             |                |
|---------------------------------------------|---------------|---------------------------------------------------------------------|-------------|----------------|
|                                             | GO:BP         | regulation of gene silencing by RNA                                 | 0.036540115 | GO:0060966     |
|                                             | GO:BP         | regulation of posttranscriptional gene silencing                    | 0.036540115 | GO:0060147     |
|                                             | GO:CC         | platelet dense granule membrane                                     | 0.038107295 | GO:0031088     |
|                                             | GO:CC         | endolysosome                                                        | 0.038107295 | GO:0036019     |
|                                             | GO:BP         | glial cell activation                                               | 0.040890465 | GO:0061900     |
|                                             | GO:MF         | cargo adaptor activity                                              | 0.044119364 | GO:0140312     |
|                                             | GO:MF         | ATP binding                                                         | 0.044119364 | GO:0005524     |
|                                             | GO:MF         | ATPase activity, coupled                                            | 0.044119364 | GO:0042623     |
|                                             | GO:MF         | drug binding                                                        | 0.044119364 | GO:0008144     |
|                                             | GO:BP         | DNA repair                                                          | 0.047063146 | GO:0006281     |
|                                             | GO:BP         | regulation of DNA metabolic process                                 | 0.047063146 | GO:0051052     |
|                                             | GO:CC         | lysosomal membrane                                                  | 0.049272792 | GO:0005765     |
|                                             | GO:CC         | lytic vacuole membrane                                              | 0.049272792 | GO:0098852     |
|                                             | GO:CC         | chromatin silencing complex                                         | 0.049978784 | GO:0005677     |
|                                             | KEGG          | Metabolic pathways                                                  | 8.55067E-07 | 01100          |
|                                             | KEGG          | Cell cycle                                                          | 1.12757E-05 | 04110          |
|                                             | KEGG          | Systemic lupus erythematosus                                        | 0.000150756 | 05322          |
|                                             | KEGG          | Endocytosis                                                         | 0.000192217 | 04144          |
|                                             | KEGG          | Alcoholism                                                          | 0.000877696 | 05034          |
|                                             | KEGG          | Tight junction                                                      | 0.002944408 | 04530          |
|                                             | KEGG          | DNA replication                                                     | 0.002944408 | 03030          |
|                                             | KEGG          | Peroxisome                                                          | 0.005047773 | 04146          |
|                                             | KEGG          | Viral carcinogenesis                                                | 0.006164176 | 05203          |
|                                             | KEGG          | Huntington disease                                                  | 0.030965791 | 05016          |
|                                             | KEGG          | EGFR tyrosine kinase inhibitor resistance                           | 0.030965791 | 01521          |
|                                             | KEGG          | ErbB signaling pathway                                              | 0.036701344 | 04012          |
| <b>Upregulated in the double-high group</b> | <b>Source</b> | <b>Terms</b>                                                        | <b>FDR</b>  | <b>Term ID</b> |
|                                             | GO:CC         | anchoring junction                                                  | 2.11958E-08 | GO:0070161     |
|                                             | GO:CC         | cytosolic ribosome                                                  | 2.11958E-08 | GO:0022626     |
|                                             | GO:BP         | cotranslational protein targeting to membrane                       | 5.6695E-08  | GO:0006613     |
|                                             | GO:BP         | SRP-dependent cotranslational protein targeting to membrane         | 5.6695E-08  | GO:0006614     |
|                                             | GO:BP         | nuclear-transcribed mRNA catabolic process, nonsense-mediated decay | 5.6695E-08  | GO:0000184     |
|                                             | GO:BP         | protein targeting to ER                                             | 1.20044E-07 | GO:0045047     |
|                                             | GO:BP         | nuclear-transcribed mRNA catabolic process                          | 1.49146E-07 | GO:0000956     |
|                                             | GO:BP         | establishment of protein localization to endoplasmic reticulum      | 1.49146E-07 | GO:0072599     |
|                                             | GO:CC         | focal adhesion                                                      | 4.23362E-07 | GO:0005925     |
|                                             | GO:CC         | cell-substrate junction                                             | 4.38106E-07 | GO:0030055     |
|                                             | GO:CC         | cell junction                                                       | 9.77692E-07 | GO:0030054     |
|                                             | GO:BP         | protein localization to endoplasmic reticulum                       | 1.57983E-06 | GO:0070972     |
|                                             | GO:CC         | ribosomal subunit                                                   | 1.84462E-06 | GO:0044391     |
|                                             | GO:CC         | cytosolic large ribosomal subunit                                   | 3.47112E-06 | GO:0022625     |
|                                             | GO:BP         | protein targeting to membrane                                       | 1.52897E-05 | GO:0006612     |

|  |       |                                                                                                                 |             |            |
|--|-------|-----------------------------------------------------------------------------------------------------------------|-------------|------------|
|  | GO:BP | translational initiation                                                                                        | 1.52897E-05 | GO:0006413 |
|  | GO:BP | viral transcription                                                                                             | 2.65144E-05 | GO:0019083 |
|  | GO:MF | structural constituent of ribosome                                                                              | 2.70758E-05 | GO:0003735 |
|  | GO:CC | ribosome                                                                                                        | 3.34825E-05 | GO:0005840 |
|  | GO:BP | viral gene expression                                                                                           | 7.48562E-05 | GO:0019080 |
|  | GO:CC | large ribosomal subunit                                                                                         | 0.000130265 | GO:0015934 |
|  | GO:CC | intracellular                                                                                                   | 0.000130265 | GO:0005622 |
|  | GO:BP | cell junction organization                                                                                      | 0.000382445 | GO:0034330 |
|  | GO:BP | establishment of protein localization to membrane                                                               | 0.000382445 | GO:0090150 |
|  | GO:BP | mRNA catabolic process                                                                                          | 0.000382445 | GO:0006402 |
|  | GO:BP | establishment of protein localization to organelle                                                              | 0.000382445 | GO:0072594 |
|  | GO:BP | cell junction assembly                                                                                          | 0.000792605 | GO:0034329 |
|  | GO:CC | ribonucleoprotein complex                                                                                       | 0.001017745 | GO:1990904 |
|  | GO:CC | stress fiber                                                                                                    | 0.001017745 | GO:0001725 |
|  | GO:CC | contractile actin filament bundle                                                                               | 0.001017745 | GO:0097517 |
|  | GO:CC | cytosol                                                                                                         | 0.00114302  | GO:0005829 |
|  | GO:CC | cell-cell junction                                                                                              | 0.001444864 | GO:0005911 |
|  | GO:CC | actin filament bundle                                                                                           | 0.001444864 | GO:0032432 |
|  | GO:BP | RNA catabolic process                                                                                           | 0.001461661 | GO:0006401 |
|  | GO:BP | cytoplasmic translation                                                                                         | 0.001461661 | GO:0002181 |
|  | GO:CC | polysomal ribosome                                                                                              | 0.001514409 | GO:0042788 |
|  | GO:BP | signal transduction by p53 class mediator                                                                       | 0.001670279 | GO:0072331 |
|  | GO:BP | positive regulation of cell cycle arrest                                                                        | 0.001670279 | GO:0071158 |
|  | GO:BP | DNA damage response, signal transduction by p53 class mediator                                                  | 0.001670279 | GO:0030330 |
|  | GO:BP | morphogenesis of an epithelium                                                                                  | 0.001670279 | GO:0002009 |
|  | GO:BP | viral process                                                                                                   | 0.001670279 | GO:0016032 |
|  | GO:CC | actomyosin                                                                                                      | 0.001936148 | GO:0042641 |
|  | GO:CC | nucleus                                                                                                         | 0.003377454 | GO:0005634 |
|  | GO:BP | protein localization to membrane                                                                                | 0.004059746 | GO:0072657 |
|  | GO:BP | symbiotic process                                                                                               | 0.004180378 | GO:0044403 |
|  | GO:BP | regulation of cell junction assembly                                                                            | 0.004640343 | GO:1901888 |
|  | GO:BP | cell-substrate junction assembly                                                                                | 0.005384431 | GO:0007044 |
|  | GO:BP | cell-substrate junction organization                                                                            | 0.005384431 | GO:0150115 |
|  | GO:BP | protein targeting                                                                                               | 0.005992127 | GO:0006605 |
|  | GO:CC | cytosolic small ribosomal subunit                                                                               | 0.006502547 | GO:0022627 |
|  | GO:BP | morphogenesis of a branching structure                                                                          | 0.006726511 | GO:0001763 |
|  | GO:BP | DNA damage response, signal transduction by p53 class mediator resulting in transcription of p21 class mediator | 0.006726511 | GO:0006978 |
|  | GO:BP | signal transduction in response to DNA damage                                                                   | 0.006729616 | GO:0042770 |
|  | GO:CC | polysome                                                                                                        | 0.006747807 | GO:0005844 |
|  | GO:CC | intracellular non-membrane-bounded organelle                                                                    | 0.006747807 | GO:0043232 |
|  | GO:CC | intracellular organelle                                                                                         | 0.006747807 | GO:0043229 |

|  |       |                                                                                               |             |            |
|--|-------|-----------------------------------------------------------------------------------------------|-------------|------------|
|  | GO:CC | non-membrane-bounded organelle                                                                | 0.006941811 | GO:0043228 |
|  | GO:BP | regulation of cell cycle arrest                                                               | 0.007648848 | GO:0071156 |
|  | GO:BP | tissue morphogenesis                                                                          | 0.007648848 | GO:0048729 |
|  | GO:BP | DNA damage response, signal transduction resulting in transcription                           | 0.007648848 | GO:0042772 |
|  | GO:BP | interspecies interaction between organisms                                                    | 0.007935545 | GO:0044419 |
|  | GO:BP | DNA damage response, signal transduction by p53 class mediator resulting in cell cycle arrest | 0.008021432 | GO:0006977 |
|  | GO:BP | signal transduction involved in mitotic G1 DNA damage checkpoint                              | 0.008415812 | GO:0072431 |
|  | GO:BP | intracellular signal transduction involved in G1 DNA damage checkpoint                        | 0.008415812 | GO:1902400 |
|  | GO:BP | signal transduction involved in mitotic DNA integrity checkpoint                              | 0.009499912 | GO:1902403 |
|  | GO:BP | signal transduction involved in mitotic DNA damage checkpoint                                 | 0.009499912 | GO:1902402 |
|  | GO:BP | signal transduction involved in mitotic cell cycle checkpoint                                 | 0.009499912 | GO:0072413 |
|  | GO:BP | mRNA metabolic process                                                                        | 0.010817634 | GO:0016071 |
|  | GO:BP | morphogenesis of a branching epithelium                                                       | 0.011313054 | GO:0061138 |
|  | GO:BP | mitotic G1 DNA damage checkpoint                                                              | 0.012538087 | GO:0031571 |
|  | GO:BP | mitotic G1/S transition checkpoint                                                            | 0.012538087 | GO:0044819 |
|  | GO:BP | G1 DNA damage checkpoint                                                                      | 0.012594474 | GO:0044783 |
|  | GO:BP | lateral sprouting involved in lung morphogenesis                                              | 0.012594474 | GO:0060490 |
|  | GO:BP | planar dichotomous subdivision of terminal units involved in lung branching morphogenesis     | 0.012594474 | GO:0060489 |
|  | GO:BP | orthogonal dichotomous subdivision of terminal units involved in lung branching morphogenesis | 0.012594474 | GO:0060488 |
|  | GO:BP | lens morphogenesis in camera-type eye                                                         | 0.013530386 | GO:0002089 |
|  | GO:BP | positive regulation of signal transduction by p53 class mediator                              | 0.013530386 | GO:1901798 |
|  | GO:BP | macromolecule catabolic process                                                               | 0.013530386 | GO:0009057 |
|  | GO:BP | positive regulation of biosynthetic process                                                   | 0.013530386 | GO:0009891 |
|  | GO:BP | intracellular signal transduction                                                             | 0.014809956 | GO:0035556 |
|  | GO:CC | cytoplasm                                                                                     | 0.015575713 | GO:0005737 |
|  | GO:MF | transcription regulator activity                                                              | 0.01563468  | GO:0140110 |
|  | GO:MF | cation binding                                                                                | 0.01563468  | GO:0043169 |
|  | GO:MF | ion binding                                                                                   | 0.01563468  | GO:0043167 |
|  | GO:MF | rRNA binding                                                                                  | 0.01563468  | GO:0019843 |
|  | GO:MF | metal ion binding                                                                             | 0.01563468  | GO:0046872 |
|  | GO:BP | negative regulation of cell-substrate adhesion                                                | 0.01573706  | GO:0010812 |
|  | GO:MF | nucleic acid binding                                                                          | 0.01603777  | GO:0003676 |
|  | GO:MF | heterocyclic compound binding                                                                 | 0.01603777  | GO:1901363 |
|  | GO:BP | protein localization to organelle                                                             | 0.01710828  | GO:0033365 |
|  | GO:BP | negative regulation of cell junction assembly                                                 | 0.017341285 | GO:1901889 |
|  | GO:BP | intrinsic apoptotic signaling pathway in response to DNA damage by p53 class mediator         | 0.017341285 | GO:0042771 |
|  | GO:BP | protein localization                                                                          | 0.017404122 | GO:0008104 |
|  | GO:CC | lamellipodium                                                                                 | 0.017424103 | GO:0030027 |

|  |       |                                                                                                                                        |             |            |
|--|-------|----------------------------------------------------------------------------------------------------------------------------------------|-------------|------------|
|  | GO:BP | nucleobase-containing compound catabolic process                                                                                       | 0.017436379 | GO:0034655 |
|  | GO:BP | RNA metabolic process                                                                                                                  | 0.018120847 | GO:0016070 |
|  | GO:BP | animal organ morphogenesis                                                                                                             | 0.019439466 | GO:0009887 |
|  | GO:BP | positive regulation of macromolecule biosynthetic process                                                                              | 0.019439466 | GO:0010557 |
|  | GO:BP | organelle organization                                                                                                                 | 0.019439466 | GO:0006996 |
|  | GO:BP | odontogenesis                                                                                                                          | 0.019439466 | GO:0042476 |
|  | GO:BP | cell adhesion                                                                                                                          | 0.019439466 | GO:0007155 |
|  | GO:BP | signal transduction involved in DNA integrity checkpoint                                                                               | 0.019439466 | GO:0072401 |
|  | GO:BP | signal transduction involved in DNA damage checkpoint                                                                                  | 0.019439466 | GO:0072422 |
|  | GO:BP | signal transduction involved in cell cycle checkpoint                                                                                  | 0.020000541 | GO:0072395 |
|  | GO:BP | biological adhesion                                                                                                                    | 0.020311338 | GO:0022610 |
|  | GO:BP | intrinsic apoptotic signaling pathway in response to DNA damage                                                                        | 0.021189712 | GO:0008630 |
|  | GO:CC | nucleoplasm                                                                                                                            | 0.021883279 | GO:0005654 |
|  | GO:MF | organic cyclic compound binding                                                                                                        | 0.022709457 | GO:0097159 |
|  | GO:MF | DNA-binding transcription repressor activity, RNA polymerase II-specific                                                               | 0.022709457 | GO:0001227 |
|  | GO:MF | DNA-binding transcription repressor activity                                                                                           | 0.022709457 | GO:0001217 |
|  | GO:BP | regulation of DNA damage response, signal transduction by p53 class mediator resulting in transcription of p21 class mediator          | 0.024630154 | GO:1902162 |
|  | GO:BP | positive regulation of DNA damage response, signal transduction by p53 class mediator resulting in transcription of p21 class mediator | 0.024630154 | GO:1902164 |
|  | GO:BP | intrinsic apoptotic signaling pathway by p53 class mediator                                                                            | 0.024630154 | GO:0072332 |
|  | GO:BP | dichotomous subdivision of terminal units involved in lung branching                                                                   | 0.024630154 | GO:0060448 |
|  | GO:BP | positive regulation of cellular biosynthetic process                                                                                   | 0.024935254 | GO:0031328 |
|  | GO:BP | lens development in camera-type eye                                                                                                    | 0.025549335 | GO:0002088 |
|  | GO:BP | apical protein localization                                                                                                            | 0.02583715  | GO:0045176 |
|  | GO:BP | lateral sprouting from an epithelium                                                                                                   | 0.02583715  | GO:0060601 |
|  | GO:CC | adherens junction                                                                                                                      | 0.026983411 | GO:0005912 |
|  | GO:BP | positive regulation of cellular metabolic process                                                                                      | 0.027525432 | GO:0031325 |
|  | GO:BP | translation                                                                                                                            | 0.027525432 | GO:0006412 |
|  | GO:CC | nuclear lumen                                                                                                                          | 0.029699566 | GO:0031981 |
|  | GO:BP | cell-substrate adhesion                                                                                                                | 0.03050677  | GO:0031589 |
|  | GO:BP | cellular component organization or biogenesis                                                                                          | 0.03050677  | GO:0071840 |
|  | GO:BP | focal adhesion assembly                                                                                                                | 0.030523143 | GO:0048041 |
|  | GO:BP | epithelium development                                                                                                                 | 0.030644858 | GO:0060429 |
|  | GO:BP | organic cyclic compound catabolic process                                                                                              | 0.030644858 | GO:1901361 |
|  | GO:BP | tissue development                                                                                                                     | 0.030727165 | GO:0009888 |
|  | GO:BP | positive regulation of macromolecule metabolic process                                                                                 | 0.030773697 | GO:0010604 |
|  | GO:BP | heterocycle catabolic process                                                                                                          | 0.030773697 | GO:0046700 |
|  | GO:BP | cellular nitrogen compound catabolic process                                                                                           | 0.030773697 | GO:0044270 |
|  | GO:BP | anatomical structure formation involved in morphogenesis                                                                               | 0.030773697 | GO:0048646 |
|  | GO:BP | branching morphogenesis of an epithelial tube                                                                                          | 0.031049805 | GO:0048754 |
|  | GO:BP | cellular macromolecule catabolic process                                                                                               | 0.031049805 | GO:0044265 |



|  |       |                                                                                       |             |            |
|--|-------|---------------------------------------------------------------------------------------|-------------|------------|
|  | GO:BP | morphogenesis of an epithelial sheet                                                  | 0.032115062 | GO:0002011 |
|  | GO:BP | negative regulation of transcription by RNA polymerase II                             | 0.032195955 | GO:0000122 |
|  | GO:BP | peptide biosynthetic process                                                          | 0.034669286 | GO:0043043 |
|  | GO:BP | positive regulation of metabolic process                                              | 0.034669286 | GO:0009893 |
|  | GO:BP | aromatic compound catabolic process                                                   | 0.035377654 | GO:0019439 |
|  | GO:BP | establishment of body hair or bristle planar orientation                              | 0.035377654 | GO:0048104 |
|  | GO:BP | frontal suture morphogenesis                                                          | 0.035377654 | GO:0060364 |
|  | GO:BP | cell cycle arrest                                                                     | 0.035377654 | GO:0007050 |
|  | GO:BP | establishment of body hair planar orientation                                         | 0.035377654 | GO:0048105 |
|  | GO:BP | camera-type eye morphogenesis                                                         | 0.035377654 | GO:0048593 |
|  | GO:BP | regulation of cell adhesion                                                           | 0.035377654 | GO:0030155 |
|  | GO:BP | hair follicle development                                                             | 0.035377654 | GO:0001942 |
|  | GO:BP | positive regulation of nucleic acid-templated transcription                           | 0.035613873 | GO:1903508 |
|  | GO:BP | positive regulation of RNA biosynthetic process                                       | 0.035667706 | GO:1902680 |
|  | GO:CC | CCR4-NOT core complex                                                                 | 0.035736658 | GO:0030015 |
|  | GO:BP | positive regulation of DNA damage response, signal transduction by p53 class mediator | 0.036097122 | GO:0043517 |
|  | GO:BP | hair cycle process                                                                    | 0.037607372 | GO:0022405 |
|  | GO:BP | skin epidermis development                                                            | 0.037607372 | GO:0098773 |
|  | GO:BP | molting cycle process                                                                 | 0.037607372 | GO:0022404 |
|  | GO:BP | cellular localization                                                                 | 0.038406923 | GO:0051641 |
|  | GO:BP | actin cytoskeleton organization                                                       | 0.038746455 | GO:0030036 |
|  | GO:BP | gland morphogenesis                                                                   | 0.038746455 | GO:0022612 |
|  | GO:BP | negative regulation of gene expression                                                | 0.038746455 | GO:0010629 |
|  | GO:BP | establishment of protein localization                                                 | 0.038746455 | GO:0045184 |
|  | GO:BP | megakaryocyte development                                                             | 0.039147965 | GO:0035855 |
|  | GO:BP | regulation of focal adhesion assembly                                                 | 0.039147965 | GO:0051893 |
|  | GO:BP | regulation of cell-substrate junction organization                                    | 0.039147965 | GO:0150116 |
|  | GO:BP | protein neddylation                                                                   | 0.039147965 | GO:0045116 |
|  | GO:BP | nucleic acid metabolic process                                                        | 0.039147965 | GO:0090304 |
|  | GO:BP | regulation of cell-substrate junction assembly                                        | 0.039147965 | GO:0090109 |
|  | GO:CC | small ribosomal subunit                                                               | 0.04158744  | GO:0015935 |
|  | GO:BP | positive regulation of RNA metabolic process                                          | 0.041721054 | GO:0051254 |
|  | GO:BP | kidney morphogenesis                                                                  | 0.042127538 | GO:0060993 |
|  | GO:BP | cellular response to external stimulus                                                | 0.042152752 | GO:0071496 |
|  | GO:BP | negative regulation of nucleic acid-templated transcription                           | 0.042152752 | GO:1903507 |
|  | GO:BP | regulation of intracellular signal transduction                                       | 0.042320682 | GO:1902531 |
|  | GO:BP | negative regulation of RNA biosynthetic process                                       | 0.042320682 | GO:1902679 |
|  | GO:BP | negative regulation of cell-substrate junction organization                           | 0.042320682 | GO:0150118 |
|  | GO:BP | negative regulation of focal adhesion assembly                                        | 0.042320682 | GO:0051895 |
|  | GO:BP | regulation of gene expression                                                         | 0.042320682 | GO:0010468 |
|  | GO:BP | craniofacial suture morphogenesis                                                     | 0.042320682 | GO:0097094 |

|                                             |               |                                                     |             |                |
|---------------------------------------------|---------------|-----------------------------------------------------|-------------|----------------|
|                                             | GO:BP         | negative regulation of transcription, DNA-templated | 0.043246248 | GO:0045892     |
|                                             | GO:BP         | cranial skeletal system development                 | 0.043975282 | GO:1904888     |
|                                             | GO:BP         | regulation of mast cell cytokine production         | 0.044782657 | GO:0032763     |
|                                             | GO:BP         | cell migration involved in kidney development       | 0.044782657 | GO:0035787     |
|                                             | GO:BP         | post-anal tail morphogenesis                        | 0.0479646   | GO:0036342     |
|                                             | GO:BP         | mitotic DNA damage checkpoint                       | 0.049305797 | GO:0044773     |
|                                             | KEGG          | Ribosome                                            | 4.33392E-10 | 03010          |
|                                             | KEGG          | Pathways in cancer                                  | 8.97096E-06 | 05200          |
|                                             | KEGG          | Transcriptional misregulation in cancer             | 0.000365052 | 05202          |
|                                             | KEGG          | MAPK signaling pathway                              | 0.006498772 | 04010          |
|                                             | KEGG          | MicroRNAs in cancer                                 | 0.007222518 | 05206          |
|                                             | KEGG          | Human papillomavirus infection                      | 0.009071854 | 05165          |
|                                             | KEGG          | Axon guidance                                       | 0.009153114 | 04360          |
|                                             | KEGG          | PI3K-Akt signaling pathway                          | 0.010722825 | 04151          |
|                                             | KEGG          | Insulin signaling pathway                           | 0.014625987 | 04910          |
|                                             | KEGG          | Herpes simplex virus 1 infection                    | 0.016678246 | 05168          |
|                                             | KEGG          | Small cell lung cancer                              | 0.022100721 | 05222          |
|                                             | KEGG          | C-type lectin receptor signaling pathway            | 0.031208175 | 04625          |
|                                             | KEGG          | Insulin resistance                                  | 0.032876783 | 04931          |
| <b>K5/6-only vs double-high</b>             |               |                                                     |             |                |
| <b>Upregulated in the K5/6-only group</b>   | <b>Source</b> | <b>Terms</b>                                        | <b>FDR</b>  | <b>Term ID</b> |
|                                             | NA            | NA                                                  | NA          | NA             |
| <b>Upregulated in the double-high group</b> | <b>Source</b> | <b>Terms</b>                                        | <b>FDR</b>  | <b>Term ID</b> |
|                                             | GO:CC         | intracellular                                       | 2.27263E-06 | GO:0005622     |
|                                             | GO:CC         | intracellular membrane-bounded organelle            | 1.39869E-05 | GO:0043231     |
|                                             | GO:CC         | intracellular organelle                             | 1.62845E-05 | GO:0043229     |
|                                             | GO:CC         | membrane-bounded organelle                          | 8.82335E-05 | GO:0043227     |
|                                             | GO:CC         | organelle                                           | 0.000176139 | GO:0043226     |
|                                             | GO:CC         | cytosolic ribosome                                  | 0.000458476 | GO:0022626     |
|                                             | GO:CC         | nucleus                                             | 0.000568222 | GO:0005634     |
|                                             | GO:MF         | DNA binding                                         | 0.002980091 | GO:0003677     |
|                                             | GO:MF         | nucleic acid binding                                | 0.002980091 | GO:0003676     |
|                                             | GO:CC         | cytosolic small ribosomal subunit                   | 0.010702776 | GO:0022627     |
|                                             | GO:BP         | cellular metabolic process                          | 0.011395581 | GO:0044237     |
|                                             | GO:BP         | primary metabolic process                           | 0.011395581 | GO:0044238     |
|                                             | GO:BP         | nucleobase-containing compound metabolic process    | 0.011395581 | GO:0006139     |
|                                             | GO:BP         | RNA metabolic process                               | 0.011395581 | GO:0016070     |
|                                             | GO:BP         | nucleic acid metabolic process                      | 0.011395581 | GO:0090304     |
|                                             | GO:CC         | ribosomal subunit                                   | 0.011798945 | GO:0044391     |
|                                             | GO:BP         | heterocycle metabolic process                       | 0.012344657 | GO:0046483     |
|                                             | GO:BP         | organic cyclic compound metabolic process           | 0.012344657 | GO:1901360     |
|                                             | GO:BP         | cellular nitrogen compound metabolic process        | 0.012344657 | GO:0034641     |

|  |       |                                                                     |             |            |
|--|-------|---------------------------------------------------------------------|-------------|------------|
|  | GO:BP | cellular macromolecule metabolic process                            | 0.012344657 | GO:0044260 |
|  | GO:BP | nitrogen compound metabolic process                                 | 0.012344657 | GO:0006807 |
|  | GO:BP | gene expression                                                     | 0.012344657 | GO:0010467 |
|  | GO:BP | cellular nitrogen compound biosynthetic process                     | 0.012344657 | GO:0044271 |
|  | GO:BP | cotranslational protein targeting to membrane                       | 0.012344657 | GO:0006613 |
|  | GO:BP | cellular aromatic compound metabolic process                        | 0.012344657 | GO:0006725 |
|  | GO:BP | SRP-dependent cotranslational protein targeting to membrane         | 0.012344657 | GO:0006614 |
|  | GO:BP | protein targeting to ER                                             | 0.013654075 | GO:0045047 |
|  | GO:BP | establishment of protein localization                               | 0.014401259 | GO:0045184 |
|  | GO:BP | regulation of cellular macromolecule biosynthetic process           | 0.014401259 | GO:2000112 |
|  | GO:BP | establishment of protein localization to endoplasmic reticulum      | 0.014401259 | GO:0072599 |
|  | GO:BP | regulation of macromolecule biosynthetic process                    | 0.015691487 | GO:0010556 |
|  | GO:BP | metabolic process                                                   | 0.01696399  | GO:0008152 |
|  | GO:BP | nuclear-transcribed mRNA catabolic process, nonsense-mediated decay | 0.01696399  | GO:0000184 |
|  | GO:BP | cellular macromolecule biosynthetic process                         | 0.01696399  | GO:0034645 |
|  | GO:CC | cell-substrate junction                                             | 0.016980193 | GO:0030055 |
|  | GO:BP | macromolecule biosynthetic process                                  | 0.018628562 | GO:0009059 |
|  | GO:BP | macromolecule metabolic process                                     | 0.021034342 | GO:0043170 |
|  | GO:BP | cellular biosynthetic process                                       | 0.022212097 | GO:0044249 |
|  | GO:BP | organic substance metabolic process                                 | 0.022887366 | GO:0071704 |
|  | GO:CC | ribonucleoprotein complex                                           | 0.024727232 | GO:1990904 |
|  | GO:BP | protein localization to endoplasmic reticulum                       | 0.024854245 | GO:0070972 |
|  | GO:BP | regulation of gene expression                                       | 0.024854245 | GO:0010468 |
|  | GO:BP | viral gene expression                                               | 0.024854245 | GO:0019080 |
|  | GO:BP | regulation of cellular biosynthetic process                         | 0.024854245 | GO:0031326 |
|  | GO:BP | translational initiation                                            | 0.024854245 | GO:0006413 |
|  | GO:BP | establishment of protein localization to membrane                   | 0.026317574 | GO:0090150 |
|  | GO:BP | organic substance biosynthetic process                              | 0.026425811 | GO:1901576 |
|  | GO:BP | establishment of protein localization to organelle                  | 0.032053263 | GO:0072594 |
|  | GO:BP | regulation of biosynthetic process                                  | 0.032063061 | GO:0009889 |
|  | GO:BP | nuclear-transcribed mRNA catabolic process                          | 0.033457136 | GO:0000956 |
|  | GO:BP | biosynthetic process                                                | 0.037110883 | GO:0009058 |
|  | GO:BP | protein transport                                                   | 0.037110883 | GO:0015031 |
|  | GO:CC | ribosome                                                            | 0.037356381 | GO:0005840 |
|  | GO:BP | protein targeting                                                   | 0.038369506 | GO:0006605 |
|  | GO:BP | regulation of nucleic acid-templated transcription                  | 0.041287999 | GO:1903506 |
|  | GO:BP | regulation of RNA biosynthetic process                              | 0.041455128 | GO:2001141 |
|  | GO:BP | regulation of RNA metabolic process                                 | 0.042136142 | GO:0051252 |
|  | GO:BP | regulation of nucleobase-containing compound metabolic process      | 0.042136142 | GO:0019219 |
|  | GO:BP | peptide transport                                                   | 0.042373576 | GO:0015833 |
|  | GO:BP | nucleic acid-templated transcription                                | 0.042373576 | GO:0097659 |
|  | GO:BP | regulation of macromolecule metabolic process                       | 0.042373576 | GO:0060255 |

|                                            |               |                                                                         |             |                |
|--------------------------------------------|---------------|-------------------------------------------------------------------------|-------------|----------------|
|                                            | GO:CC         | focal adhesion                                                          | 0.042839885 | GO:0005925     |
|                                            | GO:CC         | small ribosomal subunit                                                 | 0.042839885 | GO:0015935     |
|                                            | GO:CC         | nuclear lumen                                                           | 0.043041852 | GO:0031981     |
|                                            | GO:CC         | intracellular organelle lumen                                           | 0.043041852 | GO:0070013     |
|                                            | GO:CC         | organelle lumen                                                         | 0.043041852 | GO:0043233     |
|                                            | GO:CC         | membrane-enclosed lumen                                                 | 0.043041852 | GO:0031974     |
|                                            | GO:BP         | RNA biosynthetic process                                                | 0.044770599 | GO:0032774     |
|                                            | GO:BP         | regulation of transcription, DNA-templated                              | 0.04698976  | GO:0006355     |
|                                            | GO:BP         | cellular macromolecule catabolic process                                | 0.048193499 | GO:0044265     |
|                                            | GO:BP         | amide transport                                                         | 0.048193499 | GO:0042886     |
|                                            | KEGG          | Herpes simplex virus 1 infection                                        | 5.54331E-08 | 05168          |
|                                            | KEGG          | Ribosome                                                                | 0.002999276 | 03010          |
| <b>K20-only vs double-low</b>              |               |                                                                         |             |                |
| <b>Upregulated in the K20-only group</b>   | <b>Source</b> | <b>Terms</b>                                                            | <b>FDR</b>  | <b>Term ID</b> |
|                                            | GO:BP         | positive regulation of neuron differentiation                           | 0.04060163  | GO:0045666     |
|                                            | KEGG          | Metabolic pathways                                                      | 0.011294001 | 01100          |
|                                            | KEGG          | Prostate cancer                                                         | 0.029679874 | 05215          |
| <b>Upregulated in the double-low group</b> | <b>Source</b> | <b>Terms</b>                                                            | <b>FDR</b>  | <b>Term ID</b> |
|                                            | GO:BP         | positive regulation of macromolecule metabolic process                  | 0.000519216 | GO:0010604     |
|                                            | GO:BP         | positive regulation of nitrogen compound metabolic process              | 0.000519216 | GO:0051173     |
|                                            | GO:BP         | positive regulation of metabolic process                                | 0.001288851 | GO:0009893     |
|                                            | GO:BP         | positive regulation of cellular metabolic process                       | 0.002914289 | GO:0031325     |
|                                            | GO:BP         | positive regulation of cellular process                                 | 0.018413638 | GO:0048522     |
|                                            | GO:BP         | positive regulation of macromolecule biosynthetic process               | 0.018413638 | GO:0010557     |
|                                            | GO:BP         | positive regulation of RNA metabolic process                            | 0.018413638 | GO:0051254     |
|                                            | GO:BP         | positive regulation of biosynthetic process                             | 0.025136145 | GO:0009891     |
|                                            | GO:BP         | positive regulation of nucleic acid-templated transcription             | 0.025136145 | GO:1903508     |
|                                            | GO:BP         | tripeptide transmembrane transport                                      | 0.025136145 | GO:0035443     |
|                                            | GO:BP         | positive regulation of biological process                               | 0.025136145 | GO:0048518     |
|                                            | GO:BP         | developmental process                                                   | 0.025136145 | GO:0032502     |
|                                            | GO:BP         | positive regulation of nucleobase-containing compound metabolic process | 0.025136145 | GO:0045935     |
|                                            | GO:BP         | glutathione transmembrane transport                                     | 0.025136145 | GO:0034775     |
|                                            | GO:BP         | positive regulation of cellular biosynthetic process                    | 0.025136145 | GO:0031328     |
|                                            | GO:BP         | response to mechanical stimulus                                         | 0.025136145 | GO:0009612     |
|                                            | GO:BP         | positive regulation of RNA biosynthetic process                         | 0.025136145 | GO:1902680     |
|                                            | GO:BP         | intracellular signal transduction                                       | 0.030008141 | GO:0035556     |
|                                            | GO:BP         | apoptotic process                                                       | 0.030008141 | GO:0006915     |
|                                            | GO:BP         | lens development in camera-type eye                                     | 0.030812786 | GO:0002088     |
|                                            | GO:BP         | multicellular organismal process                                        | 0.030812786 | GO:0032501     |
|                                            | GO:MF         | DNA-binding transcription activator activity                            | 0.031427378 | GO:0001216     |
|                                            | GO:MF         | protein binding                                                         | 0.031427378 | GO:0005515     |
|                                            | GO:MF         | cell adhesion molecule binding                                          | 0.031427378 | GO:0050839     |

|                                           |               |                                                                          |             |                |
|-------------------------------------------|---------------|--------------------------------------------------------------------------|-------------|----------------|
|                                           | GO:MF         | DNA-binding transcription activator activity, RNA polymerase II-specific | 0.031427378 | GO:0001228     |
|                                           | GO:BP         | tripeptide transport                                                     | 0.035449183 | GO:0042939     |
|                                           | GO:BP         | positive regulation of gene expression                                   | 0.035449183 | GO:0010628     |
|                                           | GO:BP         | glutathione transport                                                    | 0.035449183 | GO:0034635     |
|                                           | GO:MF         | transcription regulatory region DNA binding                              | 0.036862541 | GO:0044212     |
|                                           | GO:MF         | regulatory region nucleic acid binding                                   | 0.036862541 | GO:0001067     |
|                                           | GO:BP         | odontogenesis                                                            | 0.037122886 | GO:0042476     |
|                                           | GO:BP         | multicellular organism development                                       | 0.037122886 | GO:0007275     |
|                                           | GO:BP         | regulation of nitrogen compound metabolic process                        | 0.037122886 | GO:0051171     |
|                                           | GO:MF         | chromatin binding                                                        | 0.040320043 | GO:0003682     |
|                                           | GO:BP         | regulation of primary metabolic process                                  | 0.044532289 | GO:0080090     |
|                                           | GO:BP         | odontogenesis of dentin-containing tooth                                 | 0.045353004 | GO:0042475     |
|                                           | GO:BP         | animal organ morphogenesis                                               | 0.049500257 | GO:0009887     |
| <b>K5/6-only vs double-low</b>            |               |                                                                          |             |                |
| <b>Upregulated in the K5/6-only group</b> | <b>Source</b> | <b>Terms</b>                                                             | <b>FDR</b>  | <b>Term ID</b> |
|                                           | GO:BP         | regulation of axon extension involved in axon guidance                   | 0.016989629 | GO:0048841     |
|                                           | GO:BP         | tissue morphogenesis                                                     | 0.016989629 | GO:0048729     |
|                                           | GO:BP         | positive regulation of axon extension involved in axon guidance          | 0.016989629 | GO:0048842     |
|                                           | GO:BP         | regulation of axon guidance                                              | 0.016989629 | GO:1902667     |
|                                           | GO:BP         | axon extension involved in axon guidance                                 | 0.016989629 | GO:0048846     |
|                                           | GO:BP         | neuron projection extension involved in neuron projection guidance       | 0.016989629 | GO:1902284     |
|                                           | GO:BP         | mesenchymal stem cell differentiation                                    | 0.016989629 | GO:0072497     |
|                                           | GO:BP         | positive regulation of axon guidance                                     | 0.016989629 | GO:1902669     |
|                                           | GO:BP         | biological adhesion                                                      | 0.020902314 | GO:0022610     |
|                                           | GO:BP         | positive regulation of retinal ganglion cell axon guidance               | 0.020902314 | GO:1902336     |
|                                           | GO:BP         | VEGF-activated neuropilin signaling pathway                              | 0.020902314 | GO:0038190     |
|                                           | GO:BP         | cell adhesion                                                            | 0.020902314 | GO:0007155     |
|                                           | GO:BP         | tissue development                                                       | 0.020902314 | GO:0009888     |
|                                           | GO:BP         | regulation of cell communication                                         | 0.020902314 | GO:0010646     |
|                                           | GO:BP         | epithelium development                                                   | 0.021809296 | GO:0060429     |
|                                           | GO:BP         | positive regulation of cell-matrix adhesion                              | 0.021809296 | GO:0001954     |
|                                           | GO:BP         | regulation of signaling                                                  | 0.021809296 | GO:0023051     |
|                                           | GO:BP         | endoderm formation                                                       | 0.02210452  | GO:0001706     |
|                                           | GO:BP         | morphogenesis of an epithelium                                           | 0.024019519 | GO:0002009     |
|                                           | GO:BP         | regulation of anatomical structure morphogenesis                         | 0.024094475 | GO:0022603     |
|                                           | GO:BP         | formation of primary germ layer                                          | 0.024094475 | GO:0001704     |
|                                           | GO:BP         | endothelium development                                                  | 0.026558932 | GO:0003158     |
|                                           | GO:BP         | branching involved in blood vessel morphogenesis                         | 0.026558883 | GO:0001569     |
|                                           | GO:BP         | epithelial tube morphogenesis                                            | 0.027338061 | GO:0060562     |
|                                           | GO:BP         | fasciculation of sensory neuron axon                                     | 0.03223172  | GO:0097155     |
|                                           | GO:BP         | gastrulation                                                             | 0.039835193 | GO:0007369     |
|                                           | GO:BP         | cell-substrate adhesion                                                  | 0.043123421 | GO:0031589     |

|                                            |               |                                                              |             |                |
|--------------------------------------------|---------------|--------------------------------------------------------------|-------------|----------------|
|                                            | GO:BP         | endothelial cell differentiation                             | 0.048035276 | GO:0045446     |
|                                            | GO:BP         | branching morphogenesis of an epithelial tube                | 0.048035276 | GO:0048754     |
|                                            | GO:BP         | neuropilin signaling pathway                                 | 0.048035276 | GO:0038189     |
|                                            | GO:BP         | positive regulation of mesenchymal stem cell differentiation | 0.048035276 | GO:2000741     |
|                                            | GO:BP         | tube development                                             | 0.048035276 | GO:0035295     |
|                                            | GO:BP         | cell migration                                               | 0.048035276 | GO:0016477     |
|                                            | GO:BP         | multicellular organismal homeostasis                         | 0.048035276 | GO:0048871     |
|                                            | GO:BP         | positive regulation of cellular process                      | 0.048035276 | GO:0048522     |
|                                            | GO:BP         | Rho protein signal transduction                              | 0.048035276 | GO:0007266     |
|                                            | GO:BP         | anatomical structure formation involved in morphogenesis     | 0.048035276 | GO:0048646     |
|                                            | KEGG          | Regulation of actin cytoskeleton                             | 0.005476046 | 04810          |
|                                            | KEGG          | Breast cancer                                                | 0.005539287 | 05224          |
|                                            | KEGG          | Proteoglycans in cancer                                      | 0.014267891 | 05205          |
|                                            | KEGG          | Human papillomavirus infection                               | 0.014267891 | 05165          |
|                                            | KEGG          | FoxO signaling pathway                                       | 0.01876374  | 04068          |
|                                            | KEGG          | Pathways in cancer                                           | 0.01876374  | 05200          |
|                                            | KEGG          | Phospholipase D signaling pathway                            | 0.01876374  | 04072          |
|                                            | KEGG          | Gastric cancer                                               | 0.01876374  | 05226          |
|                                            | KEGG          | Renal cell carcinoma                                         | 0.020561804 | 05211          |
|                                            | KEGG          | Hepatocellular carcinoma                                     | 0.023164748 | 05225          |
|                                            | KEGG          | Axon guidance                                                | 0.027515425 | 04360          |
|                                            | KEGG          | Focal adhesion                                               | 0.035352986 | 04510          |
|                                            | KEGG          | Insulin resistance                                           | 0.044517181 | 04931          |
|                                            | KEGG          | HIF-1 signaling pathway                                      | 0.044517181 | 04066          |
|                                            | KEGG          | Circadian rhythm                                             | 0.044517181 | 04710          |
| <b>Upregulated in the double-low group</b> | <b>Source</b> | <b>Terms</b>                                                 | <b>FDR</b>  | <b>Term ID</b> |
|                                            | GO:CC         | intracellular                                                | 1.13859E-10 | GO:0005622     |
|                                            | GO:CC         | intracellular membrane-bounded organelle                     | 6.41041E-10 | GO:0043231     |
|                                            | GO:CC         | intracellular organelle                                      | 1.64612E-07 | GO:0043229     |
|                                            | GO:CC         | nucleus                                                      | 1.64612E-07 | GO:0005634     |
|                                            | GO:CC         | membrane-bounded organelle                                   | 3.88369E-07 | GO:0043227     |
|                                            | GO:CC         | organelle                                                    | 7.55082E-06 | GO:0043226     |
|                                            | GO:CC         | nuclear lumen                                                | 0.000272054 | GO:0031981     |
|                                            | GO:CC         | organelle lumen                                              | 0.001168715 | GO:0043233     |
|                                            | GO:CC         | membrane-enclosed lumen                                      | 0.001168715 | GO:0031974     |
|                                            | GO:CC         | intracellular organelle lumen                                | 0.001168715 | GO:0070013     |
|                                            | GO:CC         | cytosol                                                      | 0.001622371 | GO:0005829     |
|                                            | GO:CC         | nucleoplasm                                                  | 0.002414275 | GO:0005654     |
|                                            | GO:CC         | ribonucleoprotein complex                                    | 0.003519478 | GO:1990904     |
|                                            | GO:CC         | midbody                                                      | 0.003629366 | GO:0030496     |
|                                            | GO:CC         | cyclin B1-CDK1 complex                                       | 0.003629366 | GO:0097125     |
|                                            | GO:CC         | cytoplasm                                                    | 0.00455025  | GO:0005737     |

|  |       |                                                                 |             |            |
|--|-------|-----------------------------------------------------------------|-------------|------------|
|  | GO:BP | intracellular transport                                         | 0.007765366 | GO:0046907 |
|  | GO:BP | cellular metabolic process                                      | 0.007765366 | GO:0044237 |
|  | GO:BP | primary metabolic process                                       | 0.008266757 | GO:0044238 |
|  | GO:BP | intrinsic apoptotic signaling pathway                           | 0.010408129 | GO:0097193 |
|  | GO:BP | metabolic process                                               | 0.010408129 | GO:0008152 |
|  | GO:BP | organic substance metabolic process                             | 0.014495254 | GO:0071704 |
|  | GO:BP | cellular response to stress                                     | 0.015229771 | GO:0033554 |
|  | GO:BP | macromolecule metabolic process                                 | 0.015229771 | GO:0043170 |
|  | GO:BP | nitrogen compound metabolic process                             | 0.015229771 | GO:0006807 |
|  | GO:BP | cellular macromolecule metabolic process                        | 0.015229771 | GO:0044260 |
|  | GO:BP | nucleobase-containing compound metabolic process                | 0.015259809 | GO:0006139 |
|  | GO:BP | regulation of intrinsic apoptotic signaling pathway             | 0.018772491 | GO:2001242 |
|  | GO:BP | intrinsic apoptotic signaling pathway in response to DNA damage | 0.028267316 | GO:0008630 |
|  | GO:BP | regulation of RNA splicing                                      | 0.028583353 | GO:0043484 |
|  | GO:BP | cellular nitrogen compound metabolic process                    | 0.028583353 | GO:0034641 |
|  | GO:BP | mitotic cell cycle process                                      | 0.029225861 | GO:1903047 |
|  | GO:BP | heterocycle metabolic process                                   | 0.031592498 | GO:0046483 |
|  | GO:BP | positive regulation of protein oligomerization                  | 0.031592498 | GO:0032461 |
|  | GO:BP | cellular aromatic compound metabolic process                    | 0.037872095 | GO:0006725 |
|  | GO:CC | organelle envelope                                              | 0.038785841 | GO:0031967 |
|  | GO:CC | envelope                                                        | 0.038785841 | GO:0031975 |
|  | GO:BP | cell cycle                                                      | 0.040809838 | GO:0007049 |
|  | GO:BP | cell cycle process                                              | 0.040809838 | GO:0022402 |
|  | GO:BP | bicellular tight junction assembly                              | 0.040809838 | GO:0070830 |
|  | GO:BP | nucleic acid metabolic process                                  | 0.040809838 | GO:0090304 |
|  | GO:BP | organic cyclic compound metabolic process                       | 0.040809838 | GO:1901360 |
|  | GO:BP | cellular response to DNA damage stimulus                        | 0.040809838 | GO:0006974 |
|  | GO:BP | mitotic cell cycle                                              | 0.043265395 | GO:0000278 |
|  | GO:BP | G2/M transition of mitotic cell cycle                           | 0.044516062 | GO:0000086 |
|  | GO:BP | cell cycle phase transition                                     | 0.044516062 | GO:0044770 |
|  | GO:BP | tight junction assembly                                         | 0.04475717  | GO:0120192 |
|  | GO:CC | neuron projection cytoplasm                                     | 0.048931405 | GO:0120111 |
|  | KEGG  | Metabolic pathways                                              | 2.56255E-05 | 01100      |
|  | KEGG  | Cell cycle                                                      | 0.012725543 | 04110      |
|  | KEGG  | p53 signaling pathway                                           | 0.012725543 | 04115      |
|  | KEGG  | Ubiquitin mediated proteolysis                                  | 0.012725543 | 04120      |
|  | KEGG  | DNA replication                                                 | 0.018514438 | 03030      |
|  | KEGG  | mRNA surveillance pathway                                       | 0.018514438 | 03015      |
|  | KEGG  | Herpes simplex virus 1 infection                                | 0.026012066 | 05168      |
|  | KEGG  | Sphingolipid signaling pathway                                  | 0.036284137 | 04071      |

**Table S3.** Class annotation to the UROMOL intrinsic subtypes by machine learning.

| Sample        | Sparse Partial Least Squares<br>(accuracy = 0.944) | Regularized Logistic Regression<br>(accuracy = 0.943) | GLMnet<br>(accuracy = 0.941) |
|---------------|----------------------------------------------------|-------------------------------------------------------|------------------------------|
| K5/6-only 1   | class_3                                            | class_3                                               | class_3                      |
| K5/6-only 2   | class_3                                            | class_2                                               | class_3                      |
| K5/6-only 3   | class_3                                            | class_3                                               | class_3                      |
| K5/6-only 4   | class_3                                            | class_3                                               | class_3                      |
| K20-only 1    | class_2                                            | class_2                                               | class_2                      |
| K20-only 2    | class_2                                            | class_2                                               | class_2                      |
| K20-only 3    | class_2                                            | class_2                                               | class_2                      |
| K20-only 4    | class_2                                            | class_2                                               | class_2                      |
| Double-high 1 | class_3                                            | class_3                                               | class_3                      |
| Double-high 2 | class_3                                            | class_2                                               | class_3                      |
| Double-high 3 | class_3                                            | class_3                                               | class_3                      |
| Double-high 4 | class_3                                            | class_2                                               | class_3                      |
| Double-low 1  | class_3                                            | class_2                                               | class_2                      |
| Double-low 2  | class_2                                            | class_2                                               | class_2                      |
| Double-low 3  | class_3                                            | class_3                                               | class_3                      |
| Double-low 4  | class_3                                            | class_3                                               | class_3                      |



**Table S4.** Clinicopathological details of the Lund cohort groups.

| Group                           | K5/6-only_Lund<br>(n = 10) | K20-only_Lund<br>(n = 3) | Double-high_Lund<br>(n = 4) | Double-low_Lund<br>(n = 6) | p <sup>a</sup> |
|---------------------------------|----------------------------|--------------------------|-----------------------------|----------------------------|----------------|
| Age, median (range)             | 78 years (63-87)           | 74 years (60-77)         | 69.5 years (66-75)          | 78 years (52-86)           | 0.350          |
| Sex                             |                            |                          |                             |                            | 0.153          |
| Female                          | 4 (40.0%)                  | 1 (33.3%)                | 0 (0.0%)                    | 0 (0.0%)                   |                |
| Male                            | 6 (60.0%)                  | 2 (66.7%)                | 4 (100.0%)                  | 6 (100.0%)                 |                |
| Stromal invasion (T stage)      |                            |                          |                             |                            | 1.000          |
| Present (T1)                    | 3 (30.0%)                  | 1 (33.3%)                | 1 (25.0%)                   | 2 (33.3%)                  |                |
| Absent (Ta)                     | 7 (70.0%)                  | 2 (66.7%)                | 3 (75.0%)                   | 4 (66.7%)                  |                |
| WHO grade                       |                            |                          |                             |                            | 0.095          |
| Grade 3                         | 2 (20.0%)                  | 2 (66.7%)                | 0 (0.0%)                    | 0 (0.0%)                   |                |
| Grade 2                         | 8 (80.0%)                  | 1 (33.3%)                | 4 (100.0%)                  | 6 (100.0%)                 |                |
| Molecular subtype               |                            |                          |                             |                            | 0.080          |
| Urothelial-like A               | 8 (80.0%)                  | 1 (33.3%)                | 4 (100.0%)                  | 6 (100.0%)                 |                |
| Urothelial-like B               | 2 (20.0%)                  | 0 (0.0%)                 | 0 (0.0%)                    | 0 (0.0%)                   |                |
| Genomically Unstable            |                            |                          |                             |                            |                |
| SCC-like                        | 0 (0.0%)                   | 1 (33.3%)                | 0 (0.0%)                    | 0 (0.0%)                   |                |
| Immunohistochemistry score      |                            |                          |                             |                            |                |
| K5/6 <sup>b</sup> (mean ± S.D.) | 2.9 ± 1.1                  | 0.9 ± 0.3                | 2.4 ± 0.5                   | 0.7 ± 0.5                  | <0.001         |
| K20 (mean ± S.D.)               | 0.0 ± 0.0                  | 2.0 ± 0.0                | 1.9 ± 0.1                   | 0.0 ± 0.0                  | <0.001         |
| K14 (mean ± S.D.)               | 0.4 ± 0.6                  | 0.0 ± 0.0                | 0.7 ± 0.4                   | 0.0 ± 0.0                  | 0.145          |
| Ki-67 (mean ± S.D.)             | 0.1 ± 0.1                  | 0.3 ± 0.1                | 0.1 ± 0.1                   | 0.2 ± 0.1                  | 0.044          |
| E2F3 (mean ± S.D.)              | 0.2 ± 0.1                  | 0.9 ± 0.5                | 0.4 ± 0.2                   | 0.2 ± 0.2                  | 0.001          |

<sup>a</sup>: Pearson's chi-squared or Fisher's exact tests for categorical variables; Mann-Whitney U test for immunohistochemistry, b: K5 score + K6 score

**Table S5.** GO and KEGG analyses of the Lund cohort.

| K20-only_Lund vs K5/6-only_Lund        |        |                                                           |             |            |
|----------------------------------------|--------|-----------------------------------------------------------|-------------|------------|
| Upregulated in the K20-only_Lund group | Source | Terms                                                     | FDR         | Term ID    |
|                                        | GO:BP  | cell cycle                                                | 1.61326E-34 | GO:0007049 |
|                                        | GO:BP  | mitotic cell cycle process                                | 3.79593E-34 | GO:1903047 |
|                                        | GO:BP  | cell cycle process                                        | 1.04742E-32 | GO:0022402 |
|                                        | GO:BP  | mitotic cell cycle                                        | 1.04742E-32 | GO:0000278 |
|                                        | GO:BP  | cell division                                             | 3.46222E-31 | GO:0051301 |
|                                        | GO:BP  | chromosome segregation                                    | 9.00562E-28 | GO:0007059 |
|                                        | GO:BP  | mitotic nuclear division                                  | 1.23047E-27 | GO:0140014 |
|                                        | GO:BP  | sister chromatid segregation                              | 3.21127E-27 | GO:0000819 |
|                                        | GO:BP  | nuclear chromosome segregation                            | 8.68222E-27 | GO:0098813 |
|                                        | GO:BP  | chromosome organization                                   | 2.40096E-26 | GO:0051276 |
|                                        | GO:BP  | mitotic sister chromatid segregation                      | 4.3679E-26  | GO:0000070 |
|                                        | GO:BP  | nuclear division                                          | 7.03824E-26 | GO:0000280 |
|                                        | GO:BP  | organelle fission                                         | 4.72889E-24 | GO:0048285 |
|                                        | GO:BP  | regulation of cell cycle                                  | 3.18716E-19 | GO:0051726 |
|                                        | GO:CC  | spindle                                                   | 5.93428E-19 | GO:0005819 |
|                                        | GO:CC  | chromosome, centromeric region                            | 2.31636E-18 | GO:0000775 |
|                                        | GO:BP  | organelle organization                                    | 8.05338E-18 | GO:0006996 |
|                                        | GO:CC  | chromosomal region                                        | 8.99634E-18 | GO:0098687 |
|                                        | GO:BP  | cell cycle phase transition                               | 1.46601E-17 | GO:0044770 |
|                                        | GO:BP  | mitotic cell cycle phase transition                       | 4.88133E-17 | GO:0044772 |
|                                        | GO:CC  | chromosome                                                | 7.89841E-17 | GO:0005694 |
|                                        | GO:BP  | microtubule cytoskeleton organization involved in mitosis | 4.62656E-16 | GO:1902850 |
|                                        | GO:CC  | microtubule cytoskeleton                                  | 1.38829E-15 | GO:0015630 |
|                                        | GO:CC  | kinetochore                                               | 1.47272E-15 | GO:0000776 |
|                                        | GO:CC  | condensed chromosome, centromeric region                  | 1.47272E-15 | GO:0000779 |
|                                        | GO:CC  | condensed chromosome                                      | 1.47272E-15 | GO:0000793 |
|                                        | GO:BP  | regulation of mitotic nuclear division                    | 2.67725E-15 | GO:0007088 |
|                                        | GO:BP  | regulation of cell cycle process                          | 5.52675E-15 | GO:0010564 |
|                                        | GO:BP  | regulation of chromosome segregation                      | 9.55387E-15 | GO:0051983 |
|                                        | GO:BP  | mitotic spindle organization                              | 1.56841E-14 | GO:0007052 |
|                                        | GO:BP  | regulation of mitotic cell cycle                          | 1.90864E-14 | GO:0007346 |
|                                        | GO:BP  | regulation of nuclear division                            | 4.17662E-14 | GO:0051783 |
|                                        | GO:CC  | intracellular non-membrane-bounded organelle              | 1.70805E-13 | GO:0043232 |
|                                        | GO:CC  | non-membrane-bounded organelle                            | 1.79513E-13 | GO:0043228 |
|                                        | GO:CC  | intracellular                                             | 2.05188E-13 | GO:0005622 |
|                                        | GO:CC  | cytosol                                                   | 3.1872E-13  | GO:0005829 |
|                                        | GO:CC  | condensed chromosome kinetochore                          | 4.64943E-13 | GO:0000777 |
|                                        | GO:BP  | spindle organization                                      | 6.58619E-13 | GO:0007051 |
|                                        | GO:CC  | nucleus                                                   | 1.68089E-12 | GO:0005634 |

|  |       |                                                             |             |            |
|--|-------|-------------------------------------------------------------|-------------|------------|
|  | GO:BP | metaphase plate congression                                 | 1.95642E-12 | GO:0051310 |
|  | GO:BP | DNA metabolic process                                       | 2.12178E-12 | GO:0006259 |
|  | GO:BP | microtubule cytoskeleton organization                       | 4.11351E-12 | GO:0000226 |
|  | GO:BP | establishment of chromosome localization                    | 4.24916E-12 | GO:0051303 |
|  | GO:BP | chromosome localization                                     | 5.01546E-12 | GO:0050000 |
|  | GO:CC | spindle pole                                                | 5.05189E-12 | GO:0000922 |
|  | GO:CC | nucleoplasm                                                 | 7.28151E-12 | GO:0005654 |
|  | GO:BP | regulation of sister chromatid segregation                  | 1.51688E-11 | GO:0033045 |
|  | GO:CC | centrosome                                                  | 2.41533E-11 | GO:0005813 |
|  | GO:CC | organelle                                                   | 2.41533E-11 | GO:0043226 |
|  | GO:BP | microtubule-based process                                   | 3.6491E-11  | GO:0007017 |
|  | GO:CC | nuclear lumen                                               | 6.11905E-11 | GO:0031981 |
|  | GO:CC | mitotic spindle                                             | 6.11905E-11 | GO:0072686 |
|  | GO:BP | regulation of mitotic sister chromatid separation           | 6.14942E-11 | GO:0010965 |
|  | GO:CC | microtubule organizing center                               | 6.46303E-11 | GO:0005815 |
|  | GO:CC | intracellular organelle                                     | 1.13375E-10 | GO:0043229 |
|  | GO:BP | mitotic sister chromatid separation                         | 1.14189E-10 | GO:0051306 |
|  | GO:BP | regulation of chromosome separation                         | 1.6771E-10  | GO:1905818 |
|  | GO:BP | negative regulation of mitotic sister chromatid separation  | 1.92437E-10 | GO:2000816 |
|  | GO:CC | midbody                                                     | 1.9918E-10  | GO:0030496 |
|  | GO:BP | negative regulation of mitotic nuclear division             | 2.09296E-10 | GO:0045839 |
|  | GO:CC | cytoskeleton                                                | 2.09463E-10 | GO:0005856 |
|  | GO:CC | membrane-bounded organelle                                  | 2.13454E-10 | GO:0043227 |
|  | GO:BP | regulation of cell cycle phase transition                   | 2.16651E-10 | GO:1901987 |
|  | GO:CC | intracellular membrane-bounded organelle                    | 2.22786E-10 | GO:0043231 |
|  | GO:BP | cellular response to DNA damage stimulus                    | 2.26297E-10 | GO:0006974 |
|  | GO:BP | negative regulation of chromosome separation                | 2.32127E-10 | GO:1905819 |
|  | GO:BP | mitotic cell cycle checkpoint                               | 2.79271E-10 | GO:0007093 |
|  | GO:BP | positive regulation of cell cycle process                   | 2.82667E-10 | GO:0090068 |
|  | GO:BP | cell cycle checkpoint                                       | 3.16923E-10 | GO:0000075 |
|  | GO:BP | negative regulation of mitotic sister chromatid segregation | 3.70002E-10 | GO:0033048 |
|  | GO:BP | regulation of mitotic sister chromatid segregation          | 4.15583E-10 | GO:0033047 |
|  | GO:BP | regulation of mitotic metaphase/anaphase transition         | 4.19129E-10 | GO:0030071 |
|  | GO:BP | nuclear DNA replication                                     | 5.09399E-10 | GO:0033260 |
|  | GO:BP | mitotic metaphase plate congression                         | 5.65585E-10 | GO:0007080 |
|  | GO:BP | negative regulation of sister chromatid segregation         | 5.65585E-10 | GO:0033046 |
|  | GO:BP | regulation of metaphase/anaphase transition of cell cycle   | 5.80485E-10 | GO:1902099 |
|  | GO:BP | metaphase/anaphase transition of mitotic cell cycle         | 5.80485E-10 | GO:0007091 |
|  | GO:BP | negative regulation of chromosome segregation               | 6.75337E-10 | GO:0051985 |
|  | GO:BP | chromosome separation                                       | 6.75337E-10 | GO:0051304 |
|  | GO:BP | regulation of mitotic cell cycle phase transition           | 7.4292E-10  | GO:1901990 |
|  | GO:BP | metaphase/anaphase transition of cell cycle                 | 8.13103E-10 | GO:0044784 |

|  |       |                                                                    |             |            |
|--|-------|--------------------------------------------------------------------|-------------|------------|
|  | GO:BP | DNA packaging                                                      | 8.59452E-10 | GO:0006323 |
|  | GO:BP | negative regulation of nuclear division                            | 9.42208E-10 | GO:0051784 |
|  | GO:BP | DNA conformation change                                            | 9.42208E-10 | GO:0071103 |
|  | GO:BP | cell cycle DNA replication                                         | 1.06333E-09 | GO:0044786 |
|  | GO:BP | spindle checkpoint                                                 | 1.06333E-09 | GO:0031577 |
|  | GO:BP | spindle assembly checkpoint                                        | 1.06333E-09 | GO:0071173 |
|  | GO:BP | mitotic spindle assembly checkpoint                                | 1.06333E-09 | GO:0007094 |
|  | GO:BP | mitotic spindle checkpoint                                         | 1.06333E-09 | GO:0071174 |
|  | GO:CC | membrane-enclosed lumen                                            | 1.08294E-09 | GO:0031974 |
|  | GO:CC | organelle lumen                                                    | 1.08294E-09 | GO:0043233 |
|  | GO:CC | intracellular organelle lumen                                      | 1.08294E-09 | GO:0070013 |
|  | GO:CC | replication fork                                                   | 1.17608E-09 | GO:0005657 |
|  | GO:BP | positive regulation of cell cycle                                  | 1.21353E-09 | GO:0045787 |
|  | GO:BP | regulation of chromosome organization                              | 1.74452E-09 | GO:0033044 |
|  | GO:BP | negative regulation of mitotic metaphase/anaphase transition       | 1.81303E-09 | GO:0045841 |
|  | GO:BP | DNA replication                                                    | 2.02151E-09 | GO:0006260 |
|  | GO:BP | cytokinesis                                                        | 2.28752E-09 | GO:0000910 |
|  | GO:BP | negative regulation of metaphase/anaphase transition of cell cycle | 2.28752E-09 | GO:1902100 |
|  | GO:BP | negative regulation of cell cycle                                  | 3.60357E-09 | GO:0045786 |
|  | GO:BP | cellular component organization                                    | 4.34824E-09 | GO:0016043 |
|  | GO:BP | cellular response to stress                                        | 4.82226E-09 | GO:0033554 |
|  | GO:BP | DNA recombination                                                  | 4.97437E-09 | GO:0006310 |
|  | GO:BP | mitotic spindle assembly                                           | 5.61469E-09 | GO:0090307 |
|  | GO:BP | cellular component organization or biogenesis                      | 6.03072E-09 | GO:0071840 |
|  | GO:BP | attachment of spindle microtubules to kinetochore                  | 1.1466E-08  | GO:0008608 |
|  | GO:BP | negative regulation of mitotic cell cycle                          | 1.26042E-08 | GO:0045930 |
|  | GO:CC | condensed nuclear chromosome, centromeric region                   | 1.68102E-08 | GO:0000780 |
|  | GO:BP | DNA repair                                                         | 1.81296E-08 | GO:0006281 |
|  | GO:BP | negative regulation of chromosome organization                     | 2.19463E-08 | GO:2001251 |
|  | GO:BP | spindle assembly                                                   | 3.81731E-08 | GO:0051225 |
|  | GO:CC | spindle microtubule                                                | 3.86241E-08 | GO:0005876 |
|  | GO:BP | cell cycle G1/S phase transition                                   | 4.85197E-08 | GO:0044843 |
|  | GO:BP | organelle localization                                             | 7.80016E-08 | GO:0051640 |
|  | GO:CC | microtubule associated complex                                     | 7.87405E-08 | GO:0005875 |
|  | GO:BP | DNA replication initiation                                         | 8.19305E-08 | GO:0006270 |
|  | GO:BP | meiotic cell cycle                                                 | 1.04934E-07 | GO:0051321 |
|  | GO:BP | establishment of organelle localization                            | 1.0807E-07  | GO:0051656 |
|  | GO:BP | positive regulation of mitotic cell cycle                          | 1.09411E-07 | GO:0045931 |
|  | GO:CC | cytoplasm                                                          | 1.25386E-07 | GO:0005737 |
|  | GO:CC | nuclear chromosome                                                 | 1.46898E-07 | GO:0000228 |
|  | GO:BP | G2/M transition of mitotic cell cycle                              | 1.56758E-07 | GO:0000086 |
|  | GO:BP | protein localization to chromosome, centromeric region             | 1.74071E-07 | GO:0071459 |

|  |       |                                                            |             |            |
|--|-------|------------------------------------------------------------|-------------|------------|
|  | GO:BP | DNA-dependent DNA replication                              | 2.63874E-07 | GO:0006261 |
|  | GO:CC | kinesin complex                                            | 3.08712E-07 | GO:0005871 |
|  | GO:BP | regulation of cytokinesis                                  | 4.15172E-07 | GO:0032465 |
|  | GO:BP | cell cycle G2/M phase transition                           | 4.32119E-07 | GO:0044839 |
|  | GO:CC | condensed nuclear chromosome kinetochore                   | 4.51331E-07 | GO:0000778 |
|  | GO:BP | G1/S transition of mitotic cell cycle                      | 4.52189E-07 | GO:0000082 |
|  | GO:CC | condensed nuclear chromosome                               | 4.65382E-07 | GO:0000794 |
|  | GO:CC | supramolecular complex                                     | 5.68662E-07 | GO:0099080 |
|  | GO:CC | microtubule                                                | 7.19859E-07 | GO:0005874 |
|  | GO:BP | meiotic cell cycle process                                 | 7.31043E-07 | GO:1903046 |
|  | GO:BP | mitotic cytokinesis                                        | 8.53984E-07 | GO:0000281 |
|  | GO:BP | cytokinetic process                                        | 8.53984E-07 | GO:0032506 |
|  | GO:BP | protein-DNA complex assembly                               | 8.66262E-07 | GO:0065004 |
|  | GO:BP | establishment of localization in cell                      | 1.0585E-06  | GO:0051649 |
|  | GO:BP | telomere maintenance via semi-conservative replication     | 1.12087E-06 | GO:0032201 |
|  | GO:BP | mitotic spindle elongation                                 | 1.28712E-06 | GO:0000022 |
|  | GO:CC | chromosome passenger complex                               | 1.30743E-06 | GO:0032133 |
|  | GO:BP | protein localization to kinetochore                        | 1.40344E-06 | GO:0034501 |
|  | GO:BP | regulation of organelle organization                       | 1.43186E-06 | GO:0033043 |
|  | GO:BP | protein-DNA complex subunit organization                   | 1.46825E-06 | GO:0071824 |
|  | GO:CC | protein-containing complex                                 | 1.55812E-06 | GO:0032991 |
|  | GO:BP | cytoskeleton-dependent cytokinesis                         | 1.77024E-06 | GO:0061640 |
|  | GO:BP | spindle elongation                                         | 2.42587E-06 | GO:0051231 |
|  | GO:BP | chromosome condensation                                    | 2.52886E-06 | GO:0030261 |
|  | GO:CC | protein-DNA complex                                        | 3.11002E-06 | GO:0032993 |
|  | GO:BP | regulation of cell cycle G2/M phase transition             | 3.24437E-06 | GO:1902749 |
|  | GO:BP | positive regulation of cell cycle phase transition         | 4.14818E-06 | GO:1901989 |
|  | GO:BP | telomere maintenance                                       | 4.26161E-06 | GO:0000723 |
|  | GO:BP | regulation of cell division                                | 5.22851E-06 | GO:0051302 |
|  | GO:CC | condensed chromosome outer kinetochore                     | 5.33099E-06 | GO:0000940 |
|  | GO:BP | double-strand break repair via homologous recombination    | 5.45012E-06 | GO:0000724 |
|  | GO:BP | recombinational repair                                     | 5.84383E-06 | GO:0000725 |
|  | GO:BP | nucleosome assembly                                        | 6.26234E-06 | GO:0006334 |
|  | GO:BP | regulation of G2/M transition of mitotic cell cycle        | 7.12167E-06 | GO:0010389 |
|  | GO:BP | positive regulation of mitotic cell cycle phase transition | 7.46363E-06 | GO:1901992 |
|  | GO:BP | negative regulation of organelle organization              | 7.46363E-06 | GO:0010639 |
|  | GO:BP | cellular aromatic compound metabolic process               | 8.22322E-06 | GO:0006725 |
|  | GO:BP | organic cyclic compound metabolic process                  | 8.44106E-06 | GO:1901360 |
|  | GO:CC | nuclear replication fork                                   | 8.75433E-06 | GO:0043596 |
|  | GO:BP | cytoskeleton organization                                  | 8.7673E-06  | GO:0007010 |
|  | GO:BP | negative regulation of cell cycle phase transition         | 8.7673E-06  | GO:1901988 |
|  | GO:BP | telomere organization                                      | 9.37611E-06 | GO:0032200 |

|  |       |                                                                                           |             |            |
|--|-------|-------------------------------------------------------------------------------------------|-------------|------------|
|  | GO:BP | antigen processing and presentation of exogenous peptide antigen via MHC class II         | 9.50811E-06 | GO:0019886 |
|  | GO:BP | meiotic nuclear division                                                                  | 9.84621E-06 | GO:0140013 |
|  | GO:BP | heterocycle metabolic process                                                             | 1.01881E-05 | GO:0046483 |
|  | GO:BP | actomyosin contractile ring assembly                                                      | 1.02234E-05 | GO:0000915 |
|  | GO:BP | assembly of actomyosin apparatus involved in cytokinesis                                  | 1.02234E-05 | GO:0000912 |
|  | GO:BP | chromatin organization                                                                    | 1.06212E-05 | GO:0006325 |
|  | GO:BP | histone phosphorylation                                                                   | 1.0953E-05  | GO:0016572 |
|  | GO:BP | antigen processing and presentation of peptide antigen via MHC class II                   | 1.32137E-05 | GO:0002495 |
|  | GO:BP | nucleosome organization                                                                   | 1.45453E-05 | GO:0034728 |
|  | GO:BP | regulation of attachment of spindle microtubules to kinetochore                           | 1.48079E-05 | GO:0051988 |
|  | GO:BP | antigen processing and presentation of peptide or polysaccharide antigen via MHC class II | 1.55501E-05 | GO:0002504 |
|  | GO:BP | negative regulation of cell cycle process                                                 | 1.55719E-05 | GO:0010948 |
|  | GO:BP | regulation of centrosome cycle                                                            | 1.55719E-05 | GO:0046605 |
|  | GO:BP | negative regulation of mitotic cell cycle phase transition                                | 1.66948E-05 | GO:1901991 |
|  | GO:BP | chromatin assembly or disassembly                                                         | 1.77699E-05 | GO:0006333 |
|  | GO:CC | cell                                                                                      | 1.82698E-05 | GO:0005623 |
|  | GO:CC | centralspindlin complex                                                                   | 1.93818E-05 | GO:0097149 |
|  | GO:BP | actomyosin contractile ring organization                                                  | 2.15542E-05 | GO:0044837 |
|  | GO:BP | mitotic spindle midzone assembly                                                          | 2.15542E-05 | GO:0051256 |
|  | GO:BP | chromatin assembly                                                                        | 2.28466E-05 | GO:0031497 |
|  | GO:BP | anaphase-promoting complex-dependent catabolic process                                    | 2.32739E-05 | GO:0031145 |
|  | GO:BP | regulation of transferase activity                                                        | 2.80619E-05 | GO:0051338 |
|  | GO:BP | protein localization to chromosome                                                        | 2.81335E-05 | GO:0034502 |
|  | GO:CC | spindle midzone                                                                           | 3.18595E-05 | GO:0051233 |
|  | GO:CC | condensed nuclear chromosome outer kinetochore                                            | 7.37003E-05 | GO:0000942 |
|  | GO:BP | centrosome cycle                                                                          | 9.33431E-05 | GO:0007098 |
|  | GO:BP | DNA replication-independent nucleosome assembly                                           | 0.000101549 | GO:0006336 |
|  | GO:BP | nucleobase-containing compound metabolic process                                          | 0.000103638 | GO:0006139 |
|  | GO:CC | cyclin-dependent protein kinase holoenzyme complex                                        | 0.000110085 | GO:0000307 |
|  | GO:BP | DNA replication-independent nucleosome organization                                       | 0.000113867 | GO:0034724 |
|  | GO:BP | spindle midzone assembly                                                                  | 0.000117862 | GO:0051255 |
|  | GO:BP | Golgi vesicle transport                                                                   | 0.000123327 | GO:0048193 |
|  | GO:BP | cellular localization                                                                     | 0.000125562 | GO:0051641 |
|  | GO:BP | centromere complex assembly                                                               | 0.00012565  | GO:0034508 |
|  | GO:BP | double-strand break repair                                                                | 0.000126298 | GO:0006302 |
|  | GO:BP | kinetochore organization                                                                  | 0.000154706 | GO:0051383 |
|  | GO:MF | adenyl nucleotide binding                                                                 | 0.000155109 | GO:0030554 |
|  | GO:MF | histone kinase activity                                                                   | 0.000155109 | GO:0035173 |
|  | GO:MF | tubulin binding                                                                           | 0.000155109 | GO:0015631 |
|  | GO:MF | adenyl ribonucleotide binding                                                             | 0.000155109 | GO:0032559 |

|  |       |                                                                         |             |            |
|--|-------|-------------------------------------------------------------------------|-------------|------------|
|  | GO:MF | catalytic activity                                                      | 0.000155109 | GO:0003824 |
|  | GO:MF | ATP binding                                                             | 0.000155109 | GO:0005524 |
|  | GO:MF | microtubule motor activity                                              | 0.000155109 | GO:0003777 |
|  | GO:MF | microtubule binding                                                     | 0.000155109 | GO:0008017 |
|  | GO:BP | organelle assembly                                                      | 0.000155166 | GO:0070925 |
|  | GO:BP | microtubule organizing center organization                              | 0.000161733 | GO:0031023 |
|  | GO:CC | DNA packaging complex                                                   | 0.000165178 | GO:0044815 |
|  | GO:CC | alpha DNA polymerase:primase complex                                    | 0.000168828 | GO:0005658 |
|  | GO:CC | condensed chromosome inner kinetochore                                  | 0.000168828 | GO:0000939 |
|  | GO:BP | double-strand break repair via break-induced replication                | 0.000173442 | GO:0000727 |
|  | GO:BP | positive regulation of mitotic nuclear division                         | 0.000173442 | GO:0045840 |
|  | GO:BP | positive regulation of protein localization to kinetochore              | 0.000180103 | GO:1905342 |
|  | GO:BP | regulation of protein localization to kinetochore                       | 0.000180103 | GO:1905340 |
|  | GO:CC | intercellular bridge                                                    | 0.000248098 | GO:0045171 |
|  | GO:BP | antigen processing and presentation of exogenous peptide antigen        | 0.000251537 | GO:0002478 |
|  | GO:BP | CENP-A containing nucleosome assembly                                   | 0.000330521 | GO:0034080 |
|  | GO:BP | CENP-A containing chromatin organization                                | 0.000330521 | GO:0061641 |
|  | GO:BP | antigen processing and presentation of exogenous antigen                | 0.000358783 | GO:0019884 |
|  | GO:BP | cellular nitrogen compound metabolic process                            | 0.000361292 | GO:0034641 |
|  | GO:BP | positive regulation of G2/M transition of mitotic cell cycle            | 0.000417805 | GO:0010971 |
|  | GO:BP | meiotic chromosome segregation                                          | 0.000425306 | GO:0045132 |
|  | GO:MF | ATPase activity                                                         | 0.000444043 | GO:0016887 |
|  | GO:BP | meiosis I cell cycle process                                            | 0.000449572 | GO:0061982 |
|  | GO:BP | regulation of spindle checkpoint                                        | 0.000461385 | GO:0090231 |
|  | GO:BP | mitotic centrosome separation                                           | 0.000461385 | GO:0007100 |
|  | GO:BP | regulation of mitotic cell cycle spindle assembly checkpoint            | 0.000461385 | GO:0090266 |
|  | GO:BP | regulation of mitotic spindle checkpoint                                | 0.000461385 | GO:1903504 |
|  | GO:BP | chromatin remodeling at centromere                                      | 0.000461385 | GO:0031055 |
|  | GO:BP | attachment of mitotic spindle microtubules to kinetochore               | 0.000461385 | GO:0051315 |
|  | GO:BP | cellular process                                                        | 0.000475769 | GO:0009987 |
|  | GO:CC | cleavage furrow                                                         | 0.000485474 | GO:0032154 |
|  | GO:CC | cell division site                                                      | 0.000515299 | GO:0032153 |
|  | GO:BP | positive regulation of nuclear division                                 | 0.000600097 | GO:0051785 |
|  | GO:BP | antigen processing and presentation of peptide antigen                  | 0.000605399 | GO:0048002 |
|  | GO:BP | centrosome separation                                                   | 0.000608841 | GO:0051299 |
|  | GO:BP | signal transduction by p53 class mediator                               | 0.000654907 | GO:0072331 |
|  | GO:BP | DNA integrity checkpoint                                                | 0.0006564   | GO:0031570 |
|  | GO:BP | positive regulation of cell cycle G2/M phase transition                 | 0.0006564   | GO:1902751 |
|  | GO:BP | regulation of cyclin-dependent protein serine/threonine kinase activity | 0.000665698 | GO:0000079 |
|  | GO:BP | cellular component assembly                                             | 0.000692955 | GO:0022607 |
|  | GO:BP | regulation of meiotic cell cycle                                        | 0.000708711 | GO:0051445 |
|  | GO:BP | regulation of microtubule cytoskeleton organization                     | 0.000733308 | GO:0070507 |

|  |       |                                                                       |             |            |
|--|-------|-----------------------------------------------------------------------|-------------|------------|
|  | GO:CC | serine/threonine protein kinase complex                               | 0.000743539 | GO:1902554 |
|  | GO:BP | nucleoside salvage                                                    | 0.000767009 | GO:0043174 |
|  | GO:BP | anatomical structure homeostasis                                      | 0.000767009 | GO:0060249 |
|  | GO:CC | replication fork protection complex                                   | 0.000841081 | GO:0031298 |
|  | GO:BP | regulation of cyclin-dependent protein kinase activity                | 0.000857601 | GO:1904029 |
|  | GO:BP | female meiotic nuclear division                                       | 0.000868577 | GO:0007143 |
|  | GO:MF | drug binding                                                          | 0.000876325 | GO:0008144 |
|  | GO:BP | positive regulation of chromosome segregation                         | 0.001008036 | GO:0051984 |
|  | GO:MF | protein binding                                                       | 0.001021848 | GO:0005515 |
|  | GO:BP | RNA phosphodiester bond hydrolysis, endonucleolytic                   | 0.001107362 | GO:0090502 |
|  | GO:CC | DNA polymerase complex                                                | 0.001131414 | GO:0042575 |
|  | GO:CC | cyclin B1-CDK1 complex                                                | 0.001231182 | GO:0097125 |
|  | GO:CC | condensed nuclear chromosome inner kinetochore                        | 0.001231182 | GO:0000941 |
|  | GO:CC | polymeric cytoskeletal fiber                                          | 0.001231182 | GO:0099513 |
|  | GO:BP | sister chromatid cohesion                                             | 0.001442497 | GO:0007062 |
|  | GO:BP | reproductive process                                                  | 0.001475539 | GO:0022414 |
|  | GO:BP | reproduction                                                          | 0.001529254 | GO:0000003 |
|  | GO:CC | contractile ring                                                      | 0.001629926 | GO:0070938 |
|  | GO:BP | cellular component biogenesis                                         | 0.001814303 | GO:0044085 |
|  | GO:MF | kinase binding                                                        | 0.001818643 | GO:0019900 |
|  | GO:BP | retrograde vesicle-mediated transport, Golgi to endoplasmic reticulum | 0.001858909 | GO:0006890 |
|  | GO:CC | protein kinase complex                                                | 0.001934846 | GO:1902911 |
|  | GO:BP | regulation of meiotic cell cycle phase transition                     | 0.001957039 | GO:1901993 |
|  | GO:BP | meiotic cell cycle phase transition                                   | 0.001957039 | GO:0044771 |
|  | GO:MF | nucleotide binding                                                    | 0.001968657 | GO:0000166 |
|  | GO:MF | motor activity                                                        | 0.001968657 | GO:0003774 |
|  | GO:MF | nucleoside phosphate binding                                          | 0.001968657 | GO:1901265 |
|  | GO:MF | protein kinase binding                                                | 0.001968657 | GO:0019901 |
|  | GO:CC | nuclear replisome                                                     | 0.002021096 | GO:0043601 |
|  | GO:BP | histone exchange                                                      | 0.002042865 | GO:0043486 |
|  | GO:BP | chromatin organization involved in regulation of transcription        | 0.002137858 | GO:0034401 |
|  | GO:BP | positive regulation of cytokinesis                                    | 0.002163763 | GO:0032467 |
|  | GO:BP | nucleoside biosynthetic process                                       | 0.002163763 | GO:0009163 |
|  | GO:MF | catalytic activity, acting on DNA                                     | 0.002297337 | GO:0140097 |
|  | GO:BP | cellular response to radiation                                        | 0.002370855 | GO:0071478 |
|  | GO:BP | nucleic acid metabolic process                                        | 0.002465273 | GO:0090304 |
|  | GO:BP | positive regulation of transferase activity                           | 0.002661565 | GO:0051347 |
|  | GO:CC | replisome                                                             | 0.002675151 | GO:0030894 |
|  | GO:BP | regulation of microtubule-based process                               | 0.002731181 | GO:0032886 |
|  | GO:BP | antigen processing and presentation                                   | 0.002731181 | GO:0019882 |
|  | GO:BP | regulation of mitotic centrosome separation                           | 0.002766932 | GO:0046602 |
|  | GO:MF | transferase activity, transferring phosphorus-containing groups       | 0.002846128 | GO:0016772 |



|  |       |                                                                         |             |            |
|--|-------|-------------------------------------------------------------------------|-------------|------------|
|  | GO:MF | RNA-DNA hybrid ribonuclease activity                                    | 0.002848092 | GO:0004523 |
|  | GO:MF | purine ribonucleotide binding                                           | 0.002848092 | GO:0032555 |
|  | GO:MF | purine ribonucleoside triphosphate binding                              | 0.002848092 | GO:0035639 |
|  | GO:BP | regulation of protein kinase activity                                   | 0.002877636 | GO:0045859 |
|  | GO:BP | cellular metabolic process                                              | 0.002926853 | GO:0044237 |
|  | GO:MF | small molecule binding                                                  | 0.00298398  | GO:0036094 |
|  | GO:MF | purine nucleotide binding                                               | 0.002988102 | GO:0017076 |
|  | GO:MF | ribonucleotide binding                                                  | 0.002988102 | GO:0032553 |
|  | GO:BP | protein-containing complex subunit organization                         | 0.003023207 | GO:0043933 |
|  | GO:BP | glycosyl compound biosynthetic process                                  | 0.003309215 | GO:1901659 |
|  | GO:MF | endoribonuclease activity                                               | 0.003400996 | GO:0004521 |
|  | GO:CC | transferase complex, transferring phosphorus-containing groups          | 0.003406896 | GO:0061695 |
|  | GO:CC | nucleosome                                                              | 0.003406896 | GO:0000786 |
|  | GO:BP | regulation of ubiquitin protein ligase activity                         | 0.003619788 | GO:1904666 |
|  | GO:CC | Flemming body                                                           | 0.003822718 | GO:0090543 |
|  | GO:MF | kinase activity                                                         | 0.004132404 | GO:0016301 |
|  | GO:MF | endonuclease activity                                                   | 0.004140533 | GO:0004519 |
|  | GO:BP | aging                                                                   | 0.004298133 | GO:0007568 |
|  | GO:BP | protein-containing complex assembly                                     | 0.004541405 | GO:0065003 |
|  | GO:BP | microtubule-based movement                                              | 0.004710615 | GO:0007018 |
|  | GO:BP | phosphate-containing compound metabolic process                         | 0.004931199 | GO:0006796 |
|  | GO:BP | pyrimidine nucleoside salvage                                           | 0.005041483 | GO:0043097 |
|  | GO:BP | pyrimidine-containing compound salvage                                  | 0.005041483 | GO:0008655 |
|  | GO:BP | histone-serine phosphorylation                                          | 0.005041483 | GO:0035404 |
|  | GO:CC | chromocenter                                                            | 0.005319889 | GO:0010369 |
|  | GO:BP | oocyte maturation                                                       | 0.00559444  | GO:0001556 |
|  | GO:MF | cyclin-dependent protein serine/threonine kinase regulator activity     | 0.005723766 | GO:0016538 |
|  | GO:MF | ATPase activity, coupled                                                | 0.005742043 | GO:0042623 |
|  | GO:BP | phosphorus metabolic process                                            | 0.005981778 | GO:0006793 |
|  | GO:BP | nucleobase-containing small molecule biosynthetic process               | 0.006008441 | GO:0034404 |
|  | GO:CC | Ndc80 complex                                                           | 0.006222909 | GO:0031262 |
|  | GO:CC | NMS complex                                                             | 0.006222909 | GO:0031617 |
|  | GO:CC | spindle pole centrosome                                                 | 0.006222909 | GO:0031616 |
|  | GO:BP | chromatin organization involved in negative regulation of transcription | 0.006359712 | GO:0097549 |
|  | GO:BP | chromatin silencing                                                     | 0.006359712 | GO:0006342 |
|  | GO:BP | protein localization to organelle                                       | 0.006359712 | GO:0033365 |
|  | GO:BP | mitotic nuclear envelope disassembly                                    | 0.006452718 | GO:0007077 |
|  | GO:BP | regulation of kinase activity                                           | 0.006623252 | GO:0043549 |
|  | GO:BP | negative regulation of cellular component organization                  | 0.006783536 | GO:0051129 |
|  | GO:BP | female gamete generation                                                | 0.006859053 | GO:0007292 |
|  | GO:CC | euchromatin                                                             | 0.007071232 | GO:0000791 |
|  | GO:BP | regulation of signal transduction by p53 class mediator                 | 0.007155046 | GO:1901796 |

|  |       |                                                               |             |            |
|--|-------|---------------------------------------------------------------|-------------|------------|
|  | GO:CC | pronucleus                                                    | 0.007289827 | GO:0045120 |
|  | GO:BP | positive regulation of G2/M1 transition of meiotic cell cycle | 0.007384969 | GO:0110032 |
|  | GO:BP | regulation of G2/M1 transition of meiotic cell cycle          | 0.007384969 | GO:0110030 |
|  | GO:BP | spindle localization                                          | 0.007384969 | GO:0051653 |
|  | GO:BP | G2/M1 transition of meiotic cell cycle                        | 0.007384969 | GO:0008315 |
|  | GO:BP | hexitol metabolic process                                     | 0.007384969 | GO:0006059 |
|  | GO:BP | negative regulation of DNA duplex unwinding                   | 0.007384969 | GO:1905463 |
|  | GO:BP | DNA replication preinitiation complex assembly                | 0.007384969 | GO:0071163 |
|  | GO:BP | nucleic acid phosphodiester bond hydrolysis                   | 0.0075508   | GO:0090305 |
|  | GO:BP | nitrogen compound metabolic process                           | 0.00852246  | GO:0006807 |
|  | GO:MF | enzyme binding                                                | 0.008663574 | GO:0019899 |
|  | GO:BP | cell population proliferation                                 | 0.009273413 | GO:0008283 |
|  | GO:BP | meiosis I                                                     | 0.00954006  | GO:0007127 |
|  | GO:MF | chromatin binding                                             | 0.009597038 | GO:0003682 |
|  | GO:MF | ribonuclease activity                                         | 0.009597038 | GO:0004540 |
|  | GO:MF | hydrolase activity                                            | 0.009689012 | GO:0016787 |
|  | GO:MF | DNA-dependent ATPase activity                                 | 0.009689012 | GO:0008094 |
|  | GO:MF | carbohydrate derivative binding                               | 0.009689012 | GO:0097367 |
|  | GO:BP | nucleotide salvage                                            | 0.009784375 | GO:0043173 |
|  | GO:CC | DNA replication preinitiation complex                         | 0.009806258 | GO:0031261 |
|  | GO:BP | regulation of cell cycle checkpoint                           | 0.009880454 | GO:1901976 |
|  | GO:BP | DNA geometric change                                          | 0.009918106 | GO:0032392 |
|  | GO:CC | germ cell nucleus                                             | 0.009940129 | GO:0043073 |
|  | GO:BP | DNA biosynthetic process                                      | 0.010673536 | GO:0071897 |
|  | GO:BP | RNA phosphodiester bond hydrolysis                            | 0.010802376 | GO:0090501 |
|  | GO:BP | regulation of catalytic activity                              | 0.010802376 | GO:0050790 |
|  | GO:BP | negative regulation of gene expression, epigenetic            | 0.010802376 | GO:0045814 |
|  | GO:BP | cell cycle arrest                                             | 0.011260796 | GO:0007050 |
|  | GO:MF | anion binding                                                 | 0.011371412 | GO:0043168 |
|  | GO:BP | protein localization to cytoskeleton                          | 0.011428025 | GO:0044380 |
|  | GO:BP | regulation of protein serine/threonine kinase activity        | 0.011518008 | GO:0071900 |
|  | GO:BP | mitotic DNA replication                                       | 0.011634703 | GO:1902969 |
|  | GO:BP | cellular protein-containing complex assembly                  | 0.01256612  | GO:0034622 |
|  | GO:BP | cellular metabolic compound salvage                           | 0.01336645  | GO:0043094 |
|  | GO:BP | cellular response to environmental stimulus                   | 0.013503175 | GO:0104004 |
|  | GO:BP | cellular response to abiotic stimulus                         | 0.013503175 | GO:0071214 |
|  | GO:BP | DNA replication, removal of RNA primer                        | 0.013503175 | GO:0043137 |
|  | GO:BP | nuclear envelope disassembly                                  | 0.013696685 | GO:0051081 |
|  | GO:BP | membrane disassembly                                          | 0.013696685 | GO:0030397 |
|  | GO:BP | ATP-dependent chromatin remodeling                            | 0.013696685 | GO:0043044 |
|  | GO:BP | pyrimidine nucleoside biosynthetic process                    | 0.013696685 | GO:0046134 |
|  | GO:MF | ribonuclease A activity                                       | 0.014124879 | GO:0004522 |

|  |       |                                                                               |             |            |
|--|-------|-------------------------------------------------------------------------------|-------------|------------|
|  | GO:MF | double-stranded DNA exodeoxyribonuclease activity                             | 0.014124879 | GO:0008309 |
|  | GO:MF | DNA primase activity                                                          | 0.014124879 | GO:0003896 |
|  | GO:BP | positive regulation of protein kinase activity                                | 0.015775292 | GO:0045860 |
|  | GO:BP | multi-organism reproductive process                                           | 0.015775292 | GO:0044703 |
|  | GO:BP | cellular response to estradiol stimulus                                       | 0.015846668 | GO:0071392 |
|  | GO:BP | establishment of mitotic spindle localization                                 | 0.015846668 | GO:0040001 |
|  | GO:BP | DNA replication checkpoint                                                    | 0.015927477 | GO:0000076 |
|  | GO:BP | mitotic chromosome condensation                                               | 0.015927477 | GO:0007076 |
|  | GO:BP | kinetochore assembly                                                          | 0.015927477 | GO:0051382 |
|  | GO:BP | midbody abscission                                                            | 0.015927477 | GO:0061952 |
|  | GO:BP | positive regulation of telomere capping                                       | 0.015927477 | GO:1904355 |
|  | GO:BP | cellular macromolecule metabolic process                                      | 0.016617616 | GO:0044260 |
|  | GO:BP | primary metabolic process                                                     | 0.016955183 | GO:0044238 |
|  | GO:BP | glycosyl compound metabolic process                                           | 0.017242975 | GO:1901657 |
|  | GO:BP | small molecule metabolic process                                              | 0.017580119 | GO:0044281 |
|  | GO:BP | gamete generation                                                             | 0.017763328 | GO:0007276 |
|  | GO:BP | regulation of cellular response to stress                                     | 0.018128955 | GO:0080135 |
|  | GO:BP | cellular response to reactive oxygen species                                  | 0.018252629 | GO:0034614 |
|  | GO:BP | regulation of exit from mitosis                                               | 0.018324463 | GO:0007096 |
|  | GO:BP | heterocycle catabolic process                                                 | 0.018324463 | GO:0046700 |
|  | GO:BP | cellular nitrogen compound catabolic process                                  | 0.018548964 | GO:0044270 |
|  | GO:MF | heterocyclic compound binding                                                 | 0.018680431 | GO:1901363 |
|  | GO:MF | phosphotransferase activity, alcohol group as acceptor                        | 0.018680431 | GO:0016773 |
|  | GO:MF | damaged DNA binding                                                           | 0.018680431 | GO:0003684 |
|  | GO:MF | single-stranded DNA helicase activity                                         | 0.018680431 | GO:0017116 |
|  | GO:BP | response to radiation                                                         | 0.018844435 | GO:0009314 |
|  | GO:MF | organic cyclic compound binding                                               | 0.019158134 | GO:0097159 |
|  | GO:BP | cofactor catabolic process                                                    | 0.019505642 | GO:0051187 |
|  | GO:BP | positive regulation of mitochondrial ATP synthesis coupled electron transport | 0.019760656 | GO:1905448 |
|  | GO:BP | positive regulation of exit from mitosis                                      | 0.019760656 | GO:0031536 |
|  | GO:BP | positive regulation of meiotic cell cycle phase transition                    | 0.019760656 | GO:1901995 |
|  | GO:BP | UMP salvage                                                                   | 0.019760656 | GO:0044206 |
|  | GO:BP | pyrimidine ribonucleotide salvage                                             | 0.019760656 | GO:0010138 |
|  | GO:BP | vitamin B6 metabolic process                                                  | 0.019760656 | GO:0042816 |
|  | GO:BP | regulation of DNA duplex unwinding                                            | 0.019760656 | GO:1905462 |
|  | GO:BP | pyrimidine nucleotide salvage                                                 | 0.019760656 | GO:0032262 |
|  | GO:BP | regulation of cellular component organization                                 | 0.019855105 | GO:0051128 |
|  | GO:MF | 3'-5' DNA helicase activity                                                   | 0.020847031 | GO:0043138 |
|  | GO:BP | phosphorylation                                                               | 0.020945041 | GO:0016310 |
|  | GO:MF | protein dimerization activity                                                 | 0.022110187 | GO:0046983 |
|  | GO:BP | cellular response to ionizing radiation                                       | 0.022829689 | GO:0071479 |

|  |       |                                                                          |             |            |
|--|-------|--------------------------------------------------------------------------|-------------|------------|
|  | GO:BP | aromatic compound catabolic process                                      | 0.022934081 | GO:0019439 |
|  | GO:BP | regulation of DNA metabolic process                                      | 0.023307815 | GO:0051052 |
|  | GO:BP | response to UV                                                           | 0.023307815 | GO:0009411 |
|  | GO:BP | error-prone translesion synthesis                                        | 0.023562672 | GO:0042276 |
|  | GO:BP | positive regulation of cellular process                                  | 0.023562672 | GO:0048522 |
|  | GO:BP | organic substance metabolic process                                      | 0.023938175 | GO:0071704 |
|  | GO:BP | chromatin remodeling                                                     | 0.024132208 | GO:0006338 |
|  | GO:BP | regulation of centrosome duplication                                     | 0.024503796 | GO:0010824 |
|  | GO:BP | cortical actin cytoskeleton organization                                 | 0.024503796 | GO:0030866 |
|  | GO:BP | nucleoside monophosphate metabolic process                               | 0.025013432 | GO:0009123 |
|  | GO:MF | protein serine/threonine/tyrosine kinase activity                        | 0.025781292 | GO:0004712 |
|  | GO:MF | kinesin binding                                                          | 0.025781292 | GO:0019894 |
|  | GO:CC | condensin complex                                                        | 0.025791772 | GO:0000796 |
|  | GO:CC | axon hillock                                                             | 0.025791772 | GO:0043203 |
|  | GO:MF | carbohydrate kinase activity                                             | 0.025814441 | GO:0019200 |
|  | GO:BP | signal transduction involved in DNA damage checkpoint                    | 0.026173203 | GO:0072422 |
|  | GO:BP | nucleoside monophosphate biosynthetic process                            | 0.026173203 | GO:0009124 |
|  | GO:BP | multicellular organismal reproductive process                            | 0.026173203 | GO:0048609 |
|  | GO:BP | signal transduction involved in DNA integrity checkpoint                 | 0.026173203 | GO:0072401 |
|  | GO:BP | positive regulation of chromosome organization                           | 0.026173203 | GO:2001252 |
|  | GO:CC | mitotic spindle pole                                                     | 0.026905607 | GO:0097431 |
|  | GO:BP | nucleoside monophosphate catabolic process                               | 0.026956101 | GO:0009125 |
|  | GO:BP | regulation of DNA topoisomerase (ATP-hydrolyzing) activity               | 0.026956101 | GO:2000371 |
|  | GO:BP | DNA replication, synthesis of RNA primer                                 | 0.026956101 | GO:0006269 |
|  | GO:BP | nucleoside metabolic process                                             | 0.026956101 | GO:0009116 |
|  | GO:BP | positive regulation of attachment of spindle microtubules to kinetochore | 0.026956101 | GO:0051987 |
|  | GO:BP | mitotic DNA integrity checkpoint                                         | 0.026956101 | GO:0044774 |
|  | GO:BP | positive regulation of xenophagy                                         | 0.026956101 | GO:1904417 |
|  | GO:BP | signal transduction involved in cell cycle checkpoint                    | 0.026956101 | GO:0072395 |
|  | GO:BP | regulation of xenophagy                                                  | 0.026956101 | GO:1904415 |
|  | GO:BP | galactose catabolic process via UDP-galactose                            | 0.026956101 | GO:0033499 |
|  | GO:BP | positive regulation of DNA topoisomerase (ATP-hydrolyzing) activity      | 0.026956101 | GO:2000373 |
|  | GO:MF | histone serine kinase activity                                           | 0.027106614 | GO:0035174 |
|  | GO:CC | chromatin                                                                | 0.027544552 | GO:0000785 |
|  | GO:MF | nucleoside-triphosphatase activity                                       | 0.02780557  | GO:0017111 |
|  | GO:BP | DNA duplex unwinding                                                     | 0.028149661 | GO:0032508 |
|  | GO:CC | supramolecular fiber                                                     | 0.028153353 | GO:0099512 |
|  | GO:BP | regulation of sister chromatid cohesion                                  | 0.028599255 | GO:0007063 |
|  | GO:BP | positive regulation of mitotic sister chromatid segregation              | 0.028599255 | GO:0062033 |
|  | GO:BP | regulation of binding                                                    | 0.028599255 | GO:0051098 |
|  | GO:BP | pyrimidine ribonucleotide biosynthetic process                           | 0.028599255 | GO:0009220 |
|  | GO:BP | negative regulation of cellular senescence                               | 0.028599255 | GO:2000773 |

|  |       |                                                                                                              |             |            |
|--|-------|--------------------------------------------------------------------------------------------------------------|-------------|------------|
|  | GO:BP | organic substance biosynthetic process                                                                       | 0.028888628 | GO:1901576 |
|  | GO:BP | multicellular organism reproduction                                                                          | 0.029428765 | GO:0032504 |
|  | GO:BP | DNA damage checkpoint                                                                                        | 0.029909246 | GO:0000077 |
|  | GO:CC | supramolecular polymer                                                                                       | 0.030536438 | GO:0099081 |
|  | GO:BP | animal organ regeneration                                                                                    | 0.030940287 | GO:0031100 |
|  | GO:BP | oocyte development                                                                                           | 0.031077937 | GO:0048599 |
|  | GO:BP | establishment of spindle localization                                                                        | 0.031077937 | GO:0051293 |
|  | GO:BP | regulation of DNA replication                                                                                | 0.031087199 | GO:0006275 |
|  | GO:MF | endonuclease activity, active with either ribo- or deoxyribonucleic acids and producing 3'-phosphomonoesters | 0.031188392 | GO:0016894 |
|  | GO:MF | single-stranded DNA binding                                                                                  | 0.031188392 | GO:0003697 |
|  | GO:MF | DNA replication origin binding                                                                               | 0.031188392 | GO:0003688 |
|  | GO:MF | DNA helicase activity                                                                                        | 0.031344417 | GO:0003678 |
|  | GO:CC | nuclear euchromatin                                                                                          | 0.031450749 | GO:0005719 |
|  | GO:BP | mitotic sister chromatid cohesion                                                                            | 0.031708585 | GO:0007064 |
|  | GO:BP | mitotic cytokinetic process                                                                                  | 0.031708585 | GO:1902410 |
|  | GO:BP | response to reactive oxygen species                                                                          | 0.032135541 | GO:0000302 |
|  | GO:BP | biosynthetic process                                                                                         | 0.032135541 | GO:0009058 |
|  | GO:MF | ATP-dependent microtubule motor activity                                                                     | 0.032908921 | GO:1990939 |
|  | GO:BP | pre-replicative complex assembly                                                                             | 0.033786761 | GO:0036388 |
|  | GO:BP | meiotic cell cycle checkpoint                                                                                | 0.033786761 | GO:0033313 |
|  | GO:BP | organic cyclic compound catabolic process                                                                    | 0.033786761 | GO:1901361 |
|  | GO:BP | response to organic cyclic compound                                                                          | 0.033786761 | GO:0014070 |
|  | GO:BP | porphyrin-containing compound catabolic process                                                              | 0.033786761 | GO:0006787 |
|  | GO:BP | L-serine biosynthetic process                                                                                | 0.033786761 | GO:0006564 |
|  | GO:BP | tetrapyrrole catabolic process                                                                               | 0.033786761 | GO:0033015 |
|  | GO:BP | pigment catabolic process                                                                                    | 0.033786761 | GO:0046149 |
|  | GO:BP | pre-replicative complex assembly involved in cell cycle DNA replication                                      | 0.033786761 | GO:1902299 |
|  | GO:BP | pre-replicative complex assembly involved in nuclear cell cycle DNA replication                              | 0.033786761 | GO:0006267 |
|  | GO:BP | spindle assembly involved in meiosis                                                                         | 0.033786761 | GO:0090306 |
|  | GO:BP | positive regulation of spindle checkpoint                                                                    | 0.033786761 | GO:0090232 |
|  | GO:BP | positive regulation of mitotic cell cycle spindle assembly checkpoint                                        | 0.033786761 | GO:0090267 |
|  | GO:BP | heme catabolic process                                                                                       | 0.033786761 | GO:0042167 |
|  | GO:BP | cellular response to UV                                                                                      | 0.03414214  | GO:0034644 |
|  | GO:BP | pyrimidine ribonucleotide metabolic process                                                                  | 0.03414214  | GO:0009218 |
|  | GO:MF | histone binding                                                                                              | 0.034273527 | GO:0042393 |
|  | GO:MF | catalytic activity, acting on RNA                                                                            | 0.034679327 | GO:0140098 |
|  | GO:BP | activation of protein kinase activity                                                                        | 0.035198425 | GO:0032147 |
|  | GO:BP | protein phosphorylation                                                                                      | 0.035398862 | GO:0006468 |
|  | GO:MF | protein kinase activity                                                                                      | 0.03551753  | GO:0004672 |
|  | GO:BP | regulation of molecular function                                                                             | 0.036168468 | GO:0065009 |

|  |       |                                                                                       |             |            |
|--|-------|---------------------------------------------------------------------------------------|-------------|------------|
|  | GO:BP | negative regulation of response to DNA damage stimulus                                | 0.037456344 | GO:2001021 |
|  | GO:BP | cell aging                                                                            | 0.037456344 | GO:0007569 |
|  | GO:BP | response to stress                                                                    | 0.037589227 | GO:0006950 |
|  | GO:BP | long-chain fatty-acyl-CoA metabolic process                                           | 0.037608228 | GO:0035336 |
|  | GO:MF | oxidoreductase activity, acting on the CH-CH group of donors, NAD or NADP as acceptor | 0.039423452 | GO:0016628 |
|  | GO:BP | regulation of cell cycle G1/S phase transition                                        | 0.040682332 | GO:1902806 |
|  | GO:MF | 5'-flap endonuclease activity                                                         | 0.040817999 | GO:0017108 |
|  | GO:MF | identical protein binding                                                             | 0.04089581  | GO:0042802 |
|  | GO:BP | protein localization to microtubule cytoskeleton                                      | 0.041093257 | GO:0072698 |
|  | GO:BP | oocyte differentiation                                                                | 0.041093257 | GO:0009994 |
|  | GO:BP | carbohydrate phosphorylation                                                          | 0.041548472 | GO:0046835 |
|  | GO:BP | regulation of telomere capping                                                        | 0.041548472 | GO:1904353 |
|  | GO:MF | nuclease activity                                                                     | 0.041663522 | GO:0004518 |
|  | GO:BP | positive regulation of histone phosphorylation                                        | 0.042026621 | GO:0033129 |
|  | GO:BP | positive regulation of kinase activity                                                | 0.042026621 | GO:0033674 |
|  | GO:BP | meiotic sister chromatid cohesion                                                     | 0.042026621 | GO:0051177 |
|  | GO:BP | meiotic sister chromatid segregation                                                  | 0.042026621 | GO:0045144 |
|  | GO:BP | regulation of mitochondrial ATP synthesis coupled electron transport                  | 0.042026621 | GO:1905446 |
|  | GO:BP | positive regulation of centrosome duplication                                         | 0.042026621 | GO:0010825 |
|  | GO:BP | female meiosis I                                                                      | 0.042026621 | GO:0007144 |
|  | GO:BP | DNA damage induced protein phosphorylation                                            | 0.042026621 | GO:0006975 |
|  | GO:BP | reciprocal meiotic recombination                                                      | 0.042604586 | GO:0007131 |
|  | GO:BP | interstrand cross-link repair                                                         | 0.042604586 | GO:0036297 |
|  | GO:BP | positive regulation of cell division                                                  | 0.043659503 | GO:0051781 |
|  | GO:BP | cofactor metabolic process                                                            | 0.043659503 | GO:0051186 |
|  | GO:MF | pyrophosphatase activity                                                              | 0.043722298 | GO:0016462 |
|  | GO:MF | cytoskeletal protein binding                                                          | 0.043722298 | GO:0008092 |
|  | GO:BP | regulation of reproductive process                                                    | 0.044192401 | GO:2000241 |
|  | GO:MF | hydrolase activity, acting on acid anhydrides, in phosphorus-containing anhydrides    | 0.044607088 | GO:0016818 |
|  | GO:MF | hydrolase activity, acting on acid anhydrides                                         | 0.044607088 | GO:0016817 |
|  | GO:BP | homologous recombination                                                              | 0.044970722 | GO:0035825 |
|  | GO:BP | regulation of ubiquitin-protein transferase activity                                  | 0.044970722 | GO:0051438 |
|  | GO:MF | hydrolase activity, acting on ester bonds                                             | 0.045680829 | GO:0016788 |
|  | GO:MF | cyclin-dependent protein serine/threonine kinase activator activity                   | 0.045680829 | GO:0061575 |
|  | GO:MF | flap endonuclease activity                                                            | 0.045680829 | GO:0048256 |
|  | GO:BP | male gamete generation                                                                | 0.046016894 | GO:0048232 |
|  | GO:BP | zymogen activation                                                                    | 0.047657366 | GO:0031638 |
|  | GO:BP | pyrimidine-containing compound biosynthetic process                                   | 0.047657366 | GO:0072528 |
|  | GO:CC | centriole                                                                             | 0.048324054 | GO:0005814 |
|  | GO:BP | negative regulation of cell aging                                                     | 0.048720539 | GO:0090344 |

|                                                |               |                                                    |             |                |
|------------------------------------------------|---------------|----------------------------------------------------|-------------|----------------|
|                                                | GO:BP         | catabolic process                                  | 0.048720539 | GO:0009056     |
|                                                | GO:BP         | oogenesis                                          | 0.049282914 | GO:0048477     |
|                                                | GO:BP         | sexual reproduction                                | 0.049358026 | GO:0019953     |
|                                                | GO:BP         | cellular response to oxidative stress              | 0.049425648 | GO:0034599     |
|                                                | KEGG          | Cell cycle                                         | 1.17314E-16 | 04110          |
|                                                | KEGG          | DNA replication                                    | 1.27094E-10 | 03030          |
|                                                | KEGG          | Oocyte meiosis                                     | 8.6754E-09  | 04114          |
|                                                | KEGG          | Metabolic pathways                                 | 7.32177E-08 | 01100          |
|                                                | KEGG          | Progesterone-mediated oocyte maturation            | 1.72373E-07 | 04914          |
|                                                | KEGG          | Human T-cell leukemia virus 1 infection            | 8.87876E-07 | 05166          |
|                                                | KEGG          | Cellular senescence                                | 6.08505E-06 | 04218          |
|                                                | KEGG          | Human immunodeficiency virus 1 infection           | 5.04423E-05 | 05170          |
|                                                | KEGG          | p53 signaling pathway                              | 0.001075312 | 04115          |
|                                                | KEGG          | Apoptosis                                          | 0.001849018 | 04210          |
|                                                | KEGG          | Necroptosis                                        | 0.004217046 | 04217          |
|                                                | KEGG          | Alcoholism                                         | 0.007007583 | 05034          |
|                                                | KEGG          | Pathways in cancer                                 | 0.007007583 | 05200          |
|                                                | KEGG          | Viral carcinogenesis                               | 0.010067511 | 05203          |
|                                                | KEGG          | Drug metabolism - other enzymes                    | 0.012126955 | 00983          |
|                                                | KEGG          | MicroRNAs in cancer                                | 0.015619636 | 05206          |
|                                                | KEGG          | Hepatitis B                                        | 0.020513148 | 05161          |
|                                                | KEGG          | Fanconi anemia pathway                             | 0.036550593 | 03460          |
|                                                | KEGG          | Pyrimidine metabolism                              | 0.040056525 | 00240          |
| <b>Upregulated in the K5/6-only_Lund group</b> | <b>Source</b> | <b>Terms</b>                                       | <b>FDR</b>  | <b>Term ID</b> |
|                                                | GO:BP         | cellular developmental process                     | 0.000177784 | GO:0048869     |
|                                                | GO:BP         | cell differentiation                               | 0.000177784 | GO:0030154     |
|                                                | GO:BP         | animal organ morphogenesis                         | 0.000188769 | GO:0009887     |
|                                                | GO:BP         | developmental process                              | 0.001054526 | GO:0032502     |
|                                                | GO:BP         | anatomical structure development                   | 0.001222627 | GO:0048856     |
|                                                | GO:BP         | regulation of developmental process                | 0.001222627 | GO:0050793     |
|                                                | GO:BP         | animal organ development                           | 0.001523567 | GO:0048513     |
|                                                | GO:BP         | anatomical structure morphogenesis                 | 0.001525066 | GO:0009653     |
|                                                | GO:BP         | system development                                 | 0.001592106 | GO:0048731     |
|                                                | GO:CC         | intracellular                                      | 0.002846084 | GO:0005622     |
|                                                | GO:BP         | epithelium development                             | 0.004653434 | GO:0060429     |
|                                                | GO:BP         | multicellular organism development                 | 0.006055579 | GO:0007275     |
|                                                | GO:BP         | tissue development                                 | 0.009369695 | GO:0009888     |
|                                                | GO:BP         | regulation of cellular metabolic process           | 0.009369695 | GO:0031323     |
|                                                | GO:BP         | positive regulation of cellular process            | 0.009369695 | GO:0048522     |
|                                                | GO:BP         | regulation of multicellular organismal development | 0.012068113 | GO:2000026     |
|                                                | GO:BP         | positive regulation of biological process          | 0.012068113 | GO:0048518     |
|                                                | GO:BP         | positive regulation of metabolic process           | 0.012986386 | GO:0009893     |

|  |       |                                                                          |             |            |
|--|-------|--------------------------------------------------------------------------|-------------|------------|
|  | GO:BP | morphogenesis of an epithelium                                           | 0.012986386 | GO:0002009 |
|  | GO:BP | regulation of metabolic process                                          | 0.012986386 | GO:0019222 |
|  | GO:BP | regulation of multicellular organismal process                           | 0.012986386 | GO:0051239 |
|  | GO:BP | regulation of cell differentiation                                       | 0.012986386 | GO:0045595 |
|  | GO:MF | sequence-specific DNA binding                                            | 0.018892921 | GO:0043565 |
|  | GO:BP | regulation of somitogenesis                                              | 0.023440867 | GO:0014807 |
|  | GO:BP | metabolic process                                                        | 0.023440867 | GO:0008152 |
|  | GO:BP | negative regulation of Notch signaling pathway involved in somitogenesis | 0.02836262  | GO:1902367 |
|  | GO:BP | regulation of Notch signaling pathway involved in somitogenesis          | 0.02836262  | GO:1902366 |
|  | GO:BP | Notch signaling pathway involved in somitogenesis                        | 0.02836262  | GO:1902359 |
|  | GO:BP | epidermis development                                                    | 0.028715024 | GO:0008544 |
|  | GO:BP | osteoblast differentiation                                               | 0.028715024 | GO:0001649 |
|  | GO:BP | regulation of macromolecule metabolic process                            | 0.028715024 | GO:0060255 |
|  | GO:BP | positive regulation of cellular metabolic process                        | 0.028715024 | GO:0031325 |
|  | GO:BP | regulation of cell population proliferation                              | 0.028715024 | GO:0042127 |
|  | GO:BP | neuronal stem cell population maintenance                                | 0.028715024 | GO:0097150 |
|  | GO:BP | negative regulation of cell differentiation                              | 0.029055458 | GO:0045596 |
|  | GO:BP | epithelial cell differentiation                                          | 0.038959071 | GO:0030855 |
|  | GO:BP | embryonic skeletal system development                                    | 0.038959071 | GO:0048706 |
|  | GO:BP | prostate glandular acinus development                                    | 0.038978512 | GO:0060525 |
|  | GO:BP | regulation of nitrogen compound metabolic process                        | 0.038978512 | GO:0051171 |
|  | GO:BP | ossification                                                             | 0.038978512 | GO:0001503 |
|  | GO:BP | organic substance metabolic process                                      | 0.040120487 | GO:0071704 |
|  | GO:BP | epithelial cell differentiation involved in prostate gland development   | 0.040609741 | GO:0060742 |
|  | GO:BP | prostate gland morphogenesis                                             | 0.040609741 | GO:0060512 |
|  | GO:BP | regulation of RNA metabolic process                                      | 0.040609741 | GO:0051252 |
|  | GO:BP | negative regulation of developmental process                             | 0.040609741 | GO:0051093 |
|  | GO:BP | sensory organ development                                                | 0.040609741 | GO:0007423 |
|  | GO:BP | hemidesmosome assembly                                                   | 0.040609741 | GO:0031581 |
|  | GO:BP | primary metabolic process                                                | 0.040609741 | GO:0044238 |
|  | GO:BP | striatal medium spiny neuron differentiation                             | 0.040609741 | GO:0021773 |
|  | GO:BP | prostate gland development                                               | 0.040609741 | GO:0030850 |
|  | GO:BP | digestive tract morphogenesis                                            | 0.040609741 | GO:0048546 |
|  | GO:BP | distal tubule development                                                | 0.040609741 | GO:0072017 |
|  | GO:BP | skeletal system morphogenesis                                            | 0.040609741 | GO:0048705 |
|  | GO:BP | regulation of primary metabolic process                                  | 0.040609741 | GO:0080090 |
|  | GO:BP | skin development                                                         | 0.040609741 | GO:0043588 |
|  | GO:BP | postsynaptic membrane assembly                                           | 0.040609741 | GO:0097104 |
|  | GO:BP | regulation of cellular biosynthetic process                              | 0.041235653 | GO:0031326 |
|  | GO:BP | cellular macromolecule metabolic process                                 | 0.041235653 | GO:0044260 |
|  | GO:BP | negative regulation of epidermal cell differentiation                    | 0.042091769 | GO:0045605 |



|                                               |               |                                                         |             |                |
|-----------------------------------------------|---------------|---------------------------------------------------------|-------------|----------------|
|                                               | GO:BP         | cellular metabolic process                              | 0.042091769 | GO:0044237     |
|                                               | GO:BP         | regulation of biosynthetic process                      | 0.042091769 | GO:0009889     |
|                                               | GO:BP         | negative regulation of biosynthetic process             | 0.042091769 | GO:0009890     |
|                                               | GO:BP         | macromolecule metabolic process                         | 0.042091769 | GO:0043170     |
|                                               | GO:MF         | sequence-specific double-stranded DNA binding           | 0.044149101 | GO:1990837     |
|                                               | GO:MF         | double-stranded DNA binding                             | 0.044149101 | GO:0003690     |
|                                               | GO:BP         | anterior/posterior pattern specification                | 0.048255585 | GO:0009952     |
|                                               | GO:BP         | positive regulation of Notch signaling pathway          | 0.048255585 | GO:0045747     |
|                                               | GO:BP         | negative regulation of cellular process                 | 0.048255585 | GO:0048523     |
|                                               | GO:BP         | positive regulation of macromolecule metabolic process  | 0.048255585 | GO:0010604     |
|                                               | KEGG          | Pathways in cancer                                      | 7.79639E-05 | 05200          |
|                                               | KEGG          | MicroRNAs in cancer                                     | 0.005338094 | 05206          |
|                                               | KEGG          | Human papillomavirus infection                          | 0.005446897 | 05165          |
|                                               | KEGG          | Metabolic pathways                                      | 0.006973847 | 01100          |
| <b>K20-only_Lund vs double-high_Lund</b>      |               |                                                         |             |                |
| <b>Upregulated in the K20-only_Lund group</b> | <b>Source</b> | <b>Terms</b>                                            | <b>FDR</b>  | <b>Term ID</b> |
|                                               | GO:BP         | cell cycle                                              | 0.000165062 | GO:0007049     |
|                                               | GO:BP         | cell cycle process                                      | 0.000165062 | GO:0022402     |
|                                               | GO:BP         | mitotic cell cycle process                              | 0.000327848 | GO:1903047     |
|                                               | GO:CC         | replication fork                                        | 0.000998714 | GO:0005657     |
|                                               | GO:BP         | DNA packaging                                           | 0.00155071  | GO:0006323     |
|                                               | GO:BP         | chromatin assembly                                      | 0.001755994 | GO:0031497     |
|                                               | GO:BP         | regulation of cell cycle                                | 0.00213358  | GO:0051726     |
|                                               | GO:BP         | cell division                                           | 0.002280645 | GO:0051301     |
|                                               | GO:BP         | mitotic cell cycle                                      | 0.002280645 | GO:0000278     |
|                                               | GO:BP         | nucleosome organization                                 | 0.002498715 | GO:0034728     |
|                                               | GO:BP         | DNA metabolic process                                   | 0.002539175 | GO:0006259     |
|                                               | GO:BP         | telomere maintenance via semi-conservative replication  | 0.002539175 | GO:0032201     |
|                                               | GO:BP         | cell cycle phase transition                             | 0.002539175 | GO:0044770     |
|                                               | GO:BP         | recombinational repair                                  | 0.002539175 | GO:0000725     |
|                                               | GO:BP         | double-strand break repair via homologous recombination | 0.002539175 | GO:0000724     |
|                                               | GO:BP         | chromatin assembly or disassembly                       | 0.002539175 | GO:0006333     |
|                                               | GO:BP         | nucleosome assembly                                     | 0.002539175 | GO:0006334     |
|                                               | GO:BP         | nuclear DNA replication                                 | 0.002961322 | GO:0033260     |
|                                               | GO:BP         | cellular response to DNA damage stimulus                | 0.003402611 | GO:0006974     |
|                                               | GO:BP         | cell cycle DNA replication                              | 0.00394811  | GO:0044786     |
|                                               | GO:CC         | spindle pole                                            | 0.004037151 | GO:0000922     |
|                                               | GO:CC         | chromosomal region                                      | 0.004037151 | GO:0098687     |
|                                               | GO:BP         | DNA recombination                                       | 0.004721776 | GO:0006310     |
|                                               | GO:BP         | protein-DNA complex subunit organization                | 0.005694787 | GO:0071824     |
|                                               | GO:BP         | chromosome organization                                 | 0.00612741  | GO:0051276     |
|                                               | GO:BP         | guanosine-containing compound biosynthetic process      | 0.006776676 | GO:1901070     |

|  |       |                                                     |             |            |
|--|-------|-----------------------------------------------------|-------------|------------|
|  | GO:CC | chromosome, centromeric region                      | 0.007605086 | GO:0000775 |
|  | GO:CC | organelle                                           | 0.007605086 | GO:0043226 |
|  | GO:BP | DNA conformation change                             | 0.008580142 | GO:0071103 |
|  | GO:CC | chromosome                                          | 0.00898126  | GO:0005694 |
|  | GO:BP | chromosome segregation                              | 0.00926221  | GO:0007059 |
|  | GO:BP | protein-DNA complex assembly                        | 0.009416782 | GO:0065004 |
|  | GO:CC | condensed chromosome                                | 0.009813816 | GO:0000793 |
|  | GO:BP | phospholipid biosynthetic process                   | 0.010262108 | GO:0008654 |
|  | GO:BP | double-strand break repair                          | 0.010262108 | GO:0006302 |
|  | GO:BP | mitotic cell cycle phase transition                 | 0.010606909 | GO:0044772 |
|  | GO:CC | membrane-bounded organelle                          | 0.011174235 | GO:0043227 |
|  | GO:CC | condensed chromosome inner kinetochore              | 0.011174235 | GO:0000939 |
|  | GO:BP | mitotic nuclear division                            | 0.011778534 | GO:0140014 |
|  | GO:MF | damaged DNA binding                                 | 0.012222799 | GO:0003684 |
|  | GO:BP | cellular response to stress                         | 0.012834445 | GO:0033554 |
|  | GO:BP | DNA replication                                     | 0.012834445 | GO:0006260 |
|  | GO:CC | microtubule cytoskeleton                            | 0.013272417 | GO:0015630 |
|  | GO:BP | organic cyclic compound metabolic process           | 0.014384421 | GO:1901360 |
|  | GO:BP | DNA replication, removal of RNA primer              | 0.014473751 | GO:0043137 |
|  | GO:BP | DNA replication-independent nucleosome assembly     | 0.016312321 | GO:0006336 |
|  | GO:BP | DNA replication-independent nucleosome organization | 0.017055708 | GO:0034724 |
|  | GO:CC | intracellular                                       | 0.01790843  | GO:0005622 |
|  | GO:CC | nuclear chromosome                                  | 0.01790843  | GO:0000228 |
|  | GO:BP | ribonucleoside biosynthetic process                 | 0.018754255 | GO:0042455 |
|  | GO:BP | purine ribonucleoside biosynthetic process          | 0.018754255 | GO:0046129 |
|  | GO:BP | purine nucleoside biosynthetic process              | 0.018754255 | GO:0042451 |
|  | GO:BP | DNA repair                                          | 0.018979795 | GO:0006281 |
|  | GO:BP | telomere maintenance                                | 0.019263357 | GO:0000723 |
|  | GO:BP | positive regulation of exit from mitosis            | 0.019457602 | GO:0031536 |
|  | GO:BP | positive regulation of cell cycle                   | 0.020794255 | GO:0045787 |
|  | GO:CC | spindle                                             | 0.022432495 | GO:0005819 |
|  | GO:BP | organelle organization                              | 0.025468114 | GO:0006996 |
|  | GO:BP | telomere organization                               | 0.026441686 | GO:0032200 |
|  | GO:BP | galactose catabolic process via UDP-galactose       | 0.026552324 | GO:0033499 |
|  | GO:BP | heterocycle metabolic process                       | 0.027465191 | GO:0046483 |
|  | GO:BP | organophosphate biosynthetic process                | 0.027465191 | GO:0090407 |
|  | GO:BP | nuclear division                                    | 0.028543679 | GO:0000280 |
|  | GO:BP | regulation of mitotic cell cycle                    | 0.030637891 | GO:0007346 |
|  | GO:BP | cellular aromatic compound metabolic process        | 0.031395231 | GO:0006725 |
|  | GO:BP | sister chromatid segregation                        | 0.033329575 | GO:0000819 |
|  | GO:CC | centrosome                                          | 0.033801352 | GO:0005813 |
|  | GO:MF | endoribonuclease activity                           | 0.036075098 | GO:0004521 |

|                                                  |               |                                                                                       |             |                |
|--------------------------------------------------|---------------|---------------------------------------------------------------------------------------|-------------|----------------|
|                                                  | GO:MF         | oxidoreductase activity, acting on the CH-CH group of donors, NAD or NADP as acceptor | 0.036075098 | GO:0016628     |
|                                                  | GO:MF         | endonuclease activity                                                                 | 0.036075098 | GO:0004519     |
|                                                  | GO:MF         | carboxylic ester hydrolase activity                                                   | 0.036075098 | GO:0052689     |
|                                                  | GO:MF         | 1-acyl-2-lysophosphatidylserine acylhydrolase activity                                | 0.036075098 | GO:0052740     |
|                                                  | GO:MF         | phospholipase A1 activity                                                             | 0.036075098 | GO:0008970     |
|                                                  | GO:MF         | nuclease activity                                                                     | 0.036075098 | GO:0004518     |
|                                                  | GO:MF         | RNA-DNA hybrid ribonuclease activity                                                  | 0.036075098 | GO:0004523     |
|                                                  | GO:MF         | hydrolase activity, acting on ester bonds                                             | 0.036075098 | GO:0016788     |
|                                                  | GO:MF         | phosphatidylserine 1-acylhydrolase activity                                           | 0.036075098 | GO:0052739     |
|                                                  | GO:MF         | transferase activity, transferring phosphorus-containing groups                       | 0.036075098 | GO:0016772     |
|                                                  | GO:BP         | nuclear chromosome segregation                                                        | 0.036162287 | GO:0098813     |
|                                                  | GO:CC         | nucleus                                                                               | 0.036181238 | GO:0005634     |
|                                                  | GO:CC         | nuclear replication fork                                                              | 0.036181238 | GO:0043596     |
|                                                  | GO:CC         | cytoplasm                                                                             | 0.036181238 | GO:0005737     |
|                                                  | GO:CC         | nucleoplasm                                                                           | 0.036515017 | GO:0005654     |
|                                                  | GO:CC         | cytosol                                                                               | 0.037903234 | GO:0005829     |
|                                                  | GO:CC         | condensed nuclear chromosome                                                          | 0.037903234 | GO:0000794     |
|                                                  | GO:MF         | myristoyl-CoA hydrolase activity                                                      | 0.04147854  | GO:0102991     |
|                                                  | GO:BP         | DNA damage induced protein phosphorylation                                            | 0.041917591 | GO:0006975     |
|                                                  | GO:CC         | condensed chromosome kinetochore                                                      | 0.046147392 | GO:0000777     |
|                                                  | GO:MF         | racemase and epimerase activity, acting on carbohydrates and derivatives              | 0.046909155 | GO:0016857     |
|                                                  | GO:BP         | RNA phosphodiester bond hydrolysis, endonucleolytic                                   | 0.047730457 | GO:0090502     |
|                                                  | GO:MF         | catalytic activity                                                                    | 0.048786203 | GO:0003824     |
|                                                  | GO:CC         | microtubule organizing center                                                         | 0.049057127 | GO:0005815     |
|                                                  | GO:CC         | intracellular organelle                                                               | 0.049057127 | GO:0043229     |
|                                                  | GO:MF         | palmitoyl-CoA hydrolase activity                                                      | 0.049081315 | GO:0016290     |
|                                                  | KEGG          | Metabolic pathways                                                                    | 2.11839E-06 | 01100          |
|                                                  | KEGG          | DNA replication                                                                       | 0.000172832 | 03030          |
|                                                  | KEGG          | Apoptosis                                                                             | 0.01642322  | 04210          |
| <b>Upregulated in the double-high_Lund group</b> | <b>Source</b> | <b>Terms</b>                                                                          | <b>FDR</b>  | <b>Term ID</b> |
|                                                  | GO:CC         | intracellular                                                                         | 0.00314123  | GO:0005622     |
|                                                  | GO:CC         | intracellular membrane-bounded organelle                                              | 0.037606381 | GO:0043231     |
|                                                  | KEGG          | Metabolic pathways                                                                    | 0.002349007 | 01100          |
|                                                  | KEGG          | Ubiquitin mediated proteolysis                                                        | 0.031477094 | 04120          |
| <b>K5/6-only_Lund vs double-high_Lund</b>        |               |                                                                                       |             |                |
| <b>Upregulated in the K5/6-only_Lund group</b>   | <b>Source</b> | <b>Terms</b>                                                                          | <b>FDR</b>  | <b>Term ID</b> |
|                                                  | GO:MF         | methylputrescine oxidase activity                                                     | 0.044256869 | GO:0052599     |
|                                                  | GO:MF         | propane-1,3-diamine oxidase activity                                                  | 0.044256869 | GO:0052600     |
|                                                  | GO:MF         | C-X3-C chemokine receptor activity                                                    | 0.044256869 | GO:0016495     |
|                                                  | GO:MF         | diamine oxidase activity                                                              | 0.044256869 | GO:0052597     |

|                                                  | GO:MF         | histamine oxidase activity                                 | 0.044256869 | GO:0052598     |
|--------------------------------------------------|---------------|------------------------------------------------------------|-------------|----------------|
| <b>Upregulated in the double-high_Lund group</b> | <b>Source</b> | <b>Terms</b>                                               | <b>FDR</b>  | <b>Term ID</b> |
|                                                  | GO:BP         | mitotic sister chromatid separation                        | 0.001419225 | GO:0051306     |
|                                                  | GO:BP         | metaphase/anaphase transition of cell cycle                | 0.001419225 | GO:0044784     |
|                                                  | GO:BP         | regulation of metaphase/anaphase transition of cell cycle  | 0.001419225 | GO:1902099     |
|                                                  | GO:BP         | regulation of mitotic metaphase/anaphase transition        | 0.001419225 | GO:0030071     |
|                                                  | GO:BP         | regulation of mitotic sister chromatid separation          | 0.001419225 | GO:0010965     |
|                                                  | GO:BP         | regulation of chromosome separation                        | 0.001419225 | GO:1905818     |
|                                                  | GO:BP         | metaphase/anaphase transition of mitotic cell cycle        | 0.001419225 | GO:0007091     |
|                                                  | GO:BP         | regulation of mitotic sister chromatid segregation         | 0.001720476 | GO:0033047     |
|                                                  | GO:BP         | negative regulation of meiotic cell cycle phase transition | 0.001720476 | GO:1901994     |
|                                                  | GO:BP         | regulation of sister chromatid segregation                 | 0.002565928 | GO:0033045     |
|                                                  | GO:BP         | chromosome separation                                      | 0.00343327  | GO:0051304     |
|                                                  | GO:BP         | phosphagen biosynthetic process                            | 0.00343327  | GO:0042396     |
|                                                  | GO:BP         | phosphocreatine biosynthetic process                       | 0.00343327  | GO:0046314     |
|                                                  | GO:BP         | phosphagen metabolic process                               | 0.00343327  | GO:0006599     |
|                                                  | GO:BP         | phosphocreatine metabolic process                          | 0.00343327  | GO:0006603     |
|                                                  | GO:BP         | regulation of chromosome segregation                       | 0.003976411 | GO:0051983     |
|                                                  | GO:BP         | cell cycle                                                 | 0.005868492 | GO:0007049     |
|                                                  | GO:BP         | cleavage furrow formation                                  | 0.005994811 | GO:0036089     |
|                                                  | GO:BP         | regulation of meiotic cell cycle phase transition          | 0.00624847  | GO:1901993     |
|                                                  | GO:BP         | creatine metabolic process                                 | 0.00624847  | GO:0006600     |
|                                                  | GO:BP         | nuclear division                                           | 0.00624847  | GO:0000280     |
|                                                  | GO:BP         | mitotic cell cycle                                         | 0.00624847  | GO:0000278     |
|                                                  | GO:BP         | meiotic cell cycle phase transition                        | 0.00624847  | GO:0044771     |
|                                                  | GO:BP         | regulation of meiotic cell cycle                           | 0.006678506 | GO:0051445     |
|                                                  | GO:MF         | creatine kinase activity                                   | 0.006778949 | GO:0004111     |
|                                                  | GO:MF         | phosphotransferase activity, nitrogenous group as acceptor | 0.006778949 | GO:0016775     |
|                                                  | GO:BP         | female gamete generation                                   | 0.007873575 | GO:0007292     |
|                                                  | GO:BP         | organelle fission                                          | 0.009255393 | GO:0048285     |
|                                                  | GO:BP         | positive regulation of mitotic nuclear division            | 0.009255393 | GO:0045840     |
|                                                  | GO:BP         | mitotic sister chromatid segregation                       | 0.010075221 | GO:0000070     |
|                                                  | GO:BP         | regulation of cell cycle phase transition                  | 0.011097738 | GO:1901987     |
|                                                  | GO:BP         | regulation of mitotic nuclear division                     | 0.012756034 | GO:0007088     |
|                                                  | GO:BP         | positive regulation of nuclear division                    | 0.014698197 | GO:0051785     |
|                                                  | GO:BP         | sister chromatid segregation                               | 0.017905326 | GO:0000819     |
|                                                  | GO:BP         | regulation of nuclear division                             | 0.017996619 | GO:0051783     |
|                                                  | GO:BP         | meiotic cell cycle process                                 | 0.017996619 | GO:1903046     |
|                                                  | GO:BP         | microtubule-based process                                  | 0.017996619 | GO:0007017     |
|                                                  | GO:BP         | cellular response to UV                                    | 0.017996619 | GO:0034644     |
|                                                  | GO:BP         | negative regulation of meiotic cell cycle                  | 0.018185885 | GO:0051447     |
|                                                  | GO:BP         | protein localization to kinetochore                        | 0.018185885 | GO:0034501     |

|  |       |                                                                                          |             |            |
|--|-------|------------------------------------------------------------------------------------------|-------------|------------|
|  | GO:BP | regulation of chromosome organization                                                    | 0.019242557 | GO:0033044 |
|  | GO:BP | negative regulation of cell division                                                     | 0.019414485 | GO:0051782 |
|  | GO:BP | microtubule cytoskeleton organization                                                    | 0.019518915 | GO:0000226 |
|  | GO:BP | positive regulation of transforming growth factor beta production                        | 0.022910233 | GO:0071636 |
|  | GO:BP | drug metabolic process                                                                   | 0.023091951 | GO:0017144 |
|  | GO:BP | protein localization to chromosome, centromeric region                                   | 0.024143891 | GO:0071459 |
|  | GO:BP | positive regulation of mitotic sister chromatid segregation                              | 0.025939142 | GO:0062033 |
|  | GO:BP | cell cycle phase transition                                                              | 0.030773975 | GO:0044770 |
|  | GO:BP | meiotic cell cycle                                                                       | 0.035372946 | GO:0051321 |
|  | GO:BP | regulation of mitotic cell cycle phase transition                                        | 0.038450137 | GO:1901990 |
|  | GO:BP | protein localization to meiotic spindle                                                  | 0.042034852 | GO:1905359 |
|  | GO:BP | thyroid gland epithelial cell proliferation                                              | 0.042034852 | GO:1990789 |
|  | GO:BP | regulation of cell cycle                                                                 | 0.042034852 | GO:0051726 |
|  | GO:BP | nuclear chromosome segregation                                                           | 0.042034852 | GO:0098813 |
|  | GO:BP | positive regulation of chromosome segregation                                            | 0.042034852 | GO:0051984 |
|  | GO:BP | cellular response to light stimulus                                                      | 0.042034852 | GO:0071482 |
|  | GO:BP | female meiotic nuclear division                                                          | 0.042034852 | GO:0007143 |
|  | GO:BP | regulation of mitotic cell cycle                                                         | 0.042034852 | GO:0007346 |
|  | GO:BP | negative regulation of microvillus assembly                                              | 0.042034852 | GO:1903697 |
|  | GO:BP | cellular response to non-ionic osmotic stress                                            | 0.042034852 | GO:0071471 |
|  | GO:BP | protein localization to meiotic spindle midzone                                          | 0.042034852 | GO:1903096 |
|  | GO:BP | regulation of thyroid gland epithelial cell proliferation                                | 0.042034852 | GO:1904441 |
|  | GO:BP | negative regulation of asymmetric cell division                                          | 0.042034852 | GO:0045769 |
|  | GO:BP | meiotic spindle assembly checkpoint                                                      | 0.042034852 | GO:0033316 |
|  | GO:BP | negative regulation of thyroid gland epithelial cell proliferation                       | 0.042034852 | GO:1904442 |
|  | GO:BP | response to non-ionic osmotic stress                                                     | 0.042034852 | GO:0010335 |
|  | GO:BP | hepatic stellate cell proliferation                                                      | 0.042034852 | GO:1990922 |
|  | GO:BP | positive regulation of hepatic stellate cell proliferation                               | 0.042034852 | GO:1904899 |
|  | GO:BP | regulation of lateral attachment of mitotic spindle microtubules to kinetochore          | 0.042034852 | GO:1905115 |
|  | GO:BP | positive regulation of lateral attachment of mitotic spindle microtubules to kinetochore | 0.042034852 | GO:1905116 |
|  | GO:BP | mitotic nuclear division                                                                 | 0.042034852 | GO:0140014 |
|  | GO:BP | meiotic spindle checkpoint                                                               | 0.042034852 | GO:0044779 |
|  | GO:BP | regulation of hepatic stellate cell proliferation                                        | 0.042034852 | GO:1904897 |
|  | GO:BP | spindle assembly checkpoint                                                              | 0.042981141 | GO:0071173 |
|  | GO:BP | mitotic spindle checkpoint                                                               | 0.042981141 | GO:0071174 |
|  | GO:BP | regulation of transforming growth factor beta production                                 | 0.042981141 | GO:0071634 |
|  | GO:BP | response to UV                                                                           | 0.042981141 | GO:0009411 |
|  | GO:BP | mitotic spindle assembly checkpoint                                                      | 0.042981141 | GO:0007094 |
|  | GO:BP | spindle checkpoint                                                                       | 0.042981141 | GO:0031577 |
|  | GO:BP | transforming growth factor beta production                                               | 0.044737471 | GO:0071604 |

|                                               |               |                                                                    |             |                |
|-----------------------------------------------|---------------|--------------------------------------------------------------------|-------------|----------------|
|                                               | GO:BP         | cytokinetic process                                                | 0.045925643 | GO:0032506     |
|                                               | GO:BP         | negative regulation of mitotic metaphase/anaphase transition       | 0.045925643 | GO:0045841     |
|                                               | GO:BP         | negative regulation of metaphase/anaphase transition of cell cycle | 0.047111198 | GO:1902100     |
|                                               | GO:BP         | cytoskeleton organization                                          | 0.047111198 | GO:0007010     |
|                                               | GO:CC         | spindle pole centrosome                                            | 0.048163769 | GO:0031616     |
|                                               | GO:BP         | negative regulation of mitotic sister chromatid separation         | 0.048875991 | GO:2000816     |
|                                               | GO:BP         | regulation of cell cycle process                                   | 0.049996763 | GO:0010564     |
|                                               | KEGG          | Metabolic pathways                                                 | 0.02988261  | 01100          |
| <b>K20-only_Lund vs double-low_Lund</b>       |               |                                                                    |             |                |
| <b>Upregulated in the K20-only_Lund group</b> | <b>Source</b> | <b>Terms</b>                                                       | <b>FDR</b>  | <b>Term ID</b> |
|                                               | GO:BP         | chromosome organization                                            | 1.18632E-12 | GO:0051276     |
|                                               | GO:BP         | sister chromatid segregation                                       | 9.82055E-12 | GO:0000819     |
|                                               | GO:BP         | mitotic cell cycle process                                         | 7.26174E-11 | GO:1903047     |
|                                               | GO:BP         | mitotic nuclear division                                           | 1.46858E-10 | GO:0140014     |
|                                               | GO:BP         | cell cycle                                                         | 2.16164E-10 | GO:0007049     |
|                                               | GO:BP         | chromosome segregation                                             | 2.16164E-10 | GO:0007059     |
|                                               | GO:BP         | cell cycle process                                                 | 2.16164E-10 | GO:0022402     |
|                                               | GO:BP         | cell division                                                      | 5.19895E-10 | GO:0051301     |
|                                               | GO:BP         | mitotic sister chromatid segregation                               | 6.1783E-10  | GO:0000070     |
|                                               | GO:BP         | nuclear chromosome segregation                                     | 6.1783E-10  | GO:0098813     |
|                                               | GO:BP         | nuclear division                                                   | 9.84112E-10 | GO:0000280     |
|                                               | GO:BP         | mitotic cell cycle                                                 | 2.51029E-09 | GO:0000278     |
|                                               | GO:CC         | chromosomal region                                                 | 4.59666E-09 | GO:0098687     |
|                                               | GO:BP         | organelle fission                                                  | 5.30111E-09 | GO:0048285     |
|                                               | GO:CC         | chromosome, centromeric region                                     | 7.22222E-09 | GO:0000775     |
|                                               | GO:BP         | organelle organization                                             | 1.91813E-08 | GO:0006996     |
|                                               | GO:CC         | spindle                                                            | 2.15245E-08 | GO:0005819     |
|                                               | GO:BP         | regulation of chromosome segregation                               | 2.26188E-08 | GO:0051983     |
|                                               | GO:BP         | microtubule cytoskeleton organization involved in mitosis          | 2.30223E-08 | GO:1902850     |
|                                               | GO:BP         | cellular response to DNA damage stimulus                           | 6.74293E-08 | GO:0006974     |
|                                               | GO:BP         | DNA repair                                                         | 1.20872E-07 | GO:0006281     |
|                                               | GO:BP         | DNA metabolic process                                              | 2.95524E-07 | GO:0006259     |
|                                               | GO:BP         | mitotic cell cycle phase transition                                | 3.07524E-07 | GO:0044772     |
|                                               | GO:BP         | mitotic spindle organization                                       | 3.96266E-07 | GO:0007052     |
|                                               | GO:BP         | regulation of sister chromatid segregation                         | 6.22574E-07 | GO:0033045     |
|                                               | GO:CC         | chromosome                                                         | 8.55706E-07 | GO:0005694     |
|                                               | GO:BP         | cell cycle phase transition                                        | 8.93584E-07 | GO:0044770     |
|                                               | GO:BP         | DNA recombination                                                  | 9.64973E-07 | GO:0006310     |
|                                               | GO:CC         | condensed chromosome                                               | 1.3109E-06  | GO:0000793     |
|                                               | GO:BP         | cellular response to stress                                        | 1.3182E-06  | GO:0033554     |
|                                               | GO:BP         | DNA packaging                                                      | 1.44162E-06 | GO:0006323     |
|                                               | GO:BP         | regulation of mitotic nuclear division                             | 1.76911E-06 | GO:0007088     |

|  |       |                                                             |             |            |
|--|-------|-------------------------------------------------------------|-------------|------------|
|  | GO:BP | spindle organization                                        | 2.30501E-06 | GO:0007051 |
|  | GO:CC | condensed chromosome, centromeric region                    | 3.79403E-06 | GO:0000779 |
|  | GO:CC | intracellular organelle lumen                               | 3.79403E-06 | GO:0070013 |
|  | GO:CC | organelle lumen                                             | 3.79403E-06 | GO:0043233 |
|  | GO:CC | membrane-enclosed lumen                                     | 3.79403E-06 | GO:0031974 |
|  | GO:BP | regulation of cell cycle                                    | 4.15199E-06 | GO:0051726 |
|  | GO:CC | spindle pole                                                | 4.44671E-06 | GO:0000922 |
|  | GO:BP | regulation of nuclear division                              | 6.01642E-06 | GO:0051783 |
|  | GO:BP | negative regulation of mitotic nuclear division             | 6.01642E-06 | GO:0045839 |
|  | GO:CC | kinetochore                                                 | 9.66268E-06 | GO:0000776 |
|  | GO:CC | condensed chromosome kinetochore                            | 1.2837E-05  | GO:0000777 |
|  | GO:CC | intracellular membrane-bounded organelle                    | 1.2837E-05  | GO:0043231 |
|  | GO:CC | intracellular                                               | 1.45493E-05 | GO:0005622 |
|  | GO:CC | nucleus                                                     | 1.45493E-05 | GO:0005634 |
|  | GO:BP | regulation of mitotic sister chromatid separation           | 1.46781E-05 | GO:0010965 |
|  | GO:BP | mitotic cell cycle checkpoint                               | 1.46781E-05 | GO:0007093 |
|  | GO:BP | negative regulation of nuclear division                     | 1.59061E-05 | GO:0051784 |
|  | GO:BP | chromosome separation                                       | 1.63249E-05 | GO:0051304 |
|  | GO:BP | DNA conformation change                                     | 1.74839E-05 | GO:0071103 |
|  | GO:BP | mitotic sister chromatid separation                         | 1.81935E-05 | GO:0051306 |
|  | GO:BP | negative regulation of mitotic sister chromatid separation  | 2.07662E-05 | GO:2000816 |
|  | GO:BP | regulation of chromosome separation                         | 2.13281E-05 | GO:1905818 |
|  | GO:BP | negative regulation of chromosome separation                | 2.28927E-05 | GO:1905819 |
|  | GO:CC | nucleoplasm                                                 | 2.80065E-05 | GO:0005654 |
|  | GO:CC | membrane-bounded organelle                                  | 2.80065E-05 | GO:0043227 |
|  | GO:BP | negative regulation of mitotic sister chromatid segregation | 2.97337E-05 | GO:0033048 |
|  | GO:BP | regulation of mitotic sister chromatid segregation          | 3.59167E-05 | GO:0033047 |
|  | GO:BP | negative regulation of sister chromatid segregation         | 3.72179E-05 | GO:0033046 |
|  | GO:BP | negative regulation of chromosome segregation               | 4.14717E-05 | GO:0051985 |
|  | GO:CC | organelle                                                   | 4.81491E-05 | GO:0043226 |
|  | GO:CC | chromosome passenger complex                                | 5.13402E-05 | GO:0032133 |
|  | GO:MF | endonuclease activity                                       | 5.14866E-05 | GO:0004519 |
|  | GO:MF | endoribonuclease activity                                   | 5.14866E-05 | GO:0004521 |
|  | GO:BP | RNA phosphodiester bond hydrolysis, endonucleolytic         | 5.77286E-05 | GO:0090502 |
|  | GO:BP | regulation of mitotic cell cycle                            | 6.13954E-05 | GO:0007346 |
|  | GO:BP | regulation of cell cycle process                            | 6.46357E-05 | GO:0010564 |
|  | GO:CC | microtubule cytoskeleton                                    | 6.83871E-05 | GO:0015630 |
|  | GO:BP | microtubule cytoskeleton organization                       | 7.31782E-05 | GO:0000226 |
|  | GO:BP | anaphase-promoting complex-dependent catabolic process      | 7.43056E-05 | GO:0031145 |
|  | GO:BP | DNA replication-independent nucleosome assembly             | 7.55581E-05 | GO:0006336 |
|  | GO:BP | DNA replication-independent nucleosome organization         | 8.28906E-05 | GO:0034724 |
|  | GO:BP | organic cyclic compound metabolic process                   | 8.49715E-05 | GO:1901360 |

|  |       |                                                                    |             |            |
|--|-------|--------------------------------------------------------------------|-------------|------------|
|  | GO:BP | heterocycle metabolic process                                      | 8.53912E-05 | GO:0046483 |
|  | GO:BP | cell cycle checkpoint                                              | 0.000102399 | GO:0000075 |
|  | GO:BP | positive regulation of cell cycle                                  | 0.000104214 | GO:0045787 |
|  | GO:BP | female meiotic nuclear division                                    | 0.000104661 | GO:0007143 |
|  | GO:BP | cellular aromatic compound metabolic process                       | 0.000107015 | GO:0006725 |
|  | GO:BP | regulation of mitotic metaphase/anaphase transition                | 0.000109907 | GO:0030071 |
|  | GO:BP | mitotic spindle assembly                                           | 0.000109907 | GO:0090307 |
|  | GO:CC | cytosol                                                            | 0.000111434 | GO:0005829 |
|  | GO:CC | cyclin-dependent protein kinase holoenzyme complex                 | 0.000121549 | GO:0000307 |
|  | GO:CC | nuclear lumen                                                      | 0.000121549 | GO:0031981 |
|  | GO:MF | ribonuclease activity                                              | 0.000127965 | GO:0004540 |
|  | GO:BP | regulation of metaphase/anaphase transition of cell cycle          | 0.000130085 | GO:1902099 |
|  | GO:BP | metaphase/anaphase transition of mitotic cell cycle                | 0.000130085 | GO:0007091 |
|  | GO:BP | metaphase/anaphase transition of cell cycle                        | 0.000155483 | GO:0044784 |
|  | GO:BP | regulation of cell cycle phase transition                          | 0.000180223 | GO:1901987 |
|  | GO:BP | mitotic spindle assembly checkpoint                                | 0.00018444  | GO:0007094 |
|  | GO:BP | spindle assembly checkpoint                                        | 0.00018444  | GO:0071173 |
|  | GO:BP | spindle checkpoint                                                 | 0.00018444  | GO:0031577 |
|  | GO:BP | mitotic spindle checkpoint                                         | 0.00018444  | GO:0071174 |
|  | GO:BP | nucleosome assembly                                                | 0.000184814 | GO:0006334 |
|  | GO:BP | cellular nitrogen compound metabolic process                       | 0.000198428 | GO:0034641 |
|  | GO:BP | positive regulation of cell cycle process                          | 0.000199264 | GO:0090068 |
|  | GO:BP | histone phosphorylation                                            | 0.000199369 | GO:0016572 |
|  | GO:MF | catalytic activity                                                 | 0.000200519 | GO:0003824 |
|  | GO:BP | negative regulation of mitotic metaphase/anaphase transition       | 0.00022433  | GO:0045841 |
|  | GO:BP | regulation of chromosome organization                              | 0.000224404 | GO:0033044 |
|  | GO:CC | intracellular organelle                                            | 0.000227585 | GO:0043229 |
|  | GO:BP | nucleic acid phosphodiester bond hydrolysis                        | 0.000242102 | GO:0090305 |
|  | GO:BP | negative regulation of metaphase/anaphase transition of cell cycle | 0.000244832 | GO:1902100 |
|  | GO:BP | meiotic cell cycle                                                 | 0.000245139 | GO:0051321 |
|  | GO:BP | chromatin organization                                             | 0.000269803 | GO:0006325 |
|  | GO:BP | spindle assembly                                                   | 0.000273752 | GO:0051225 |
|  | GO:BP | cellular metabolic process                                         | 0.000286587 | GO:0044237 |
|  | GO:CC | serine/threonine protein kinase complex                            | 0.000291322 | GO:1902554 |
|  | GO:BP | G2/M transition of mitotic cell cycle                              | 0.000294161 | GO:0000086 |
|  | GO:BP | regulation of mitotic cell cycle phase transition                  | 0.000294161 | GO:1901990 |
|  | GO:CC | nuclear chromosome                                                 | 0.000304656 | GO:0000228 |
|  | GO:CC | intracellular non-membrane-bounded organelle                       | 0.000304656 | GO:0043232 |
|  | GO:CC | midbody                                                            | 0.000304656 | GO:0030496 |
|  | GO:CC | non-membrane-bounded organelle                                     | 0.000304656 | GO:0043228 |
|  | GO:CC | centrosome                                                         | 0.000304656 | GO:0005813 |
|  | GO:BP | RNA phosphodiester bond hydrolysis                                 | 0.000308459 | GO:0090501 |



|  |       |                                                         |             |            |
|--|-------|---------------------------------------------------------|-------------|------------|
|  | GO:BP | CENP-A containing nucleosome assembly                   | 0.000314789 | GO:0034080 |
|  | GO:BP | CENP-A containing chromatin organization                | 0.000314789 | GO:0061641 |
|  | GO:BP | double-strand break repair                              | 0.000316381 | GO:0006302 |
|  | GO:BP | cellular component organization                         | 0.000316381 | GO:0016043 |
|  | GO:CC | condensed nuclear chromosome, centromeric region        | 0.000361311 | GO:0000780 |
|  | GO:MF | histone kinase activity                                 | 0.000371304 | GO:0035173 |
|  | GO:BP | chromatin assembly                                      | 0.000397103 | GO:0031497 |
|  | GO:BP | cellular component organization or biogenesis           | 0.000397103 | GO:0071840 |
|  | GO:CC | microtubule organizing center                           | 0.000398983 | GO:0005815 |
|  | GO:BP | chromatin remodeling at centromere                      | 0.000411839 | GO:0031055 |
|  | GO:BP | mitotic metaphase plate congression                     | 0.000411839 | GO:0007080 |
|  | GO:BP | microtubule-based process                               | 0.000433864 | GO:0007017 |
|  | GO:BP | cell cycle G2/M phase transition                        | 0.000463769 | GO:0044839 |
|  | GO:CC | cyclin B1-CDK1 complex                                  | 0.000472759 | GO:0097125 |
|  | GO:BP | negative regulation of mitotic cell cycle               | 0.000487379 | GO:0045930 |
|  | GO:CC | condensed nuclear chromosome                            | 0.000504894 | GO:0000794 |
|  | GO:CC | protein kinase complex                                  | 0.000548295 | GO:1902911 |
|  | GO:CC | cytoplasm                                               | 0.00059097  | GO:0005737 |
|  | GO:BP | negative regulation of cell cycle                       | 0.000597667 | GO:0045786 |
|  | GO:CC | microtubule associated complex                          | 0.000607375 | GO:0005875 |
|  | GO:MF | nuclease activity                                       | 0.000774002 | GO:0004518 |
|  | GO:BP | negative regulation of cell cycle process               | 0.000788386 | GO:0010948 |
|  | GO:CC | endonuclease complex                                    | 0.000815031 | GO:1905348 |
|  | GO:BP | oocyte maturation                                       | 0.000847824 | GO:0001556 |
|  | GO:BP | organic substance metabolic process                     | 0.000847824 | GO:0071704 |
|  | GO:BP | nucleosome organization                                 | 0.000894749 | GO:0034728 |
|  | GO:BP | centromere complex assembly                             | 0.000906326 | GO:0034508 |
|  | GO:BP | chromatin assembly or disassembly                       | 0.001022397 | GO:0006333 |
|  | GO:MF | RNA-DNA hybrid ribonuclease activity                    | 0.001025294 | GO:0004523 |
|  | GO:BP | double-strand break repair via homologous recombination | 0.001093739 | GO:0000724 |
|  | GO:BP | recombinational repair                                  | 0.001133867 | GO:0000725 |
|  | GO:BP | meiotic cell cycle process                              | 0.001196353 | GO:1903046 |
|  | GO:BP | female gamete generation                                | 0.00127335  | GO:0007292 |
|  | GO:BP | metaphase plate congression                             | 0.001306863 | GO:0051310 |
|  | GO:BP | histone exchange                                        | 0.001402744 | GO:0043486 |
|  | GO:CC | mitotic spindle                                         | 0.001520724 | GO:0072686 |
|  | GO:BP | negative regulation of chromosome organization          | 0.001540123 | GO:2001251 |
|  | GO:CC | condensed nuclear chromosome kinetochore                | 0.001567432 | GO:0000778 |
|  | GO:BP | mitotic nuclear envelope disassembly                    | 0.001599906 | GO:0007077 |
|  | GO:BP | gamete generation                                       | 0.001703127 | GO:0007276 |
|  | GO:BP | primary metabolic process                               | 0.001820878 | GO:0044238 |
|  | GO:BP | nitrogen compound metabolic process                     | 0.001982098 | GO:0006807 |

|  |       |                                                                                                              |             |            |
|--|-------|--------------------------------------------------------------------------------------------------------------|-------------|------------|
|  | GO:BP | nucleobase-containing compound metabolic process                                                             | 0.002028999 | GO:0006139 |
|  | GO:BP | negative regulation of cell cycle phase transition                                                           | 0.002028999 | GO:1901988 |
|  | GO:BP | metabolic process                                                                                            | 0.002187254 | GO:0008152 |
|  | GO:CC | peroxisome                                                                                                   | 0.002324588 | GO:0005777 |
|  | GO:CC | microbody                                                                                                    | 0.002324588 | GO:0042579 |
|  | GO:BP | DNA replication                                                                                              | 0.002335666 | GO:0006260 |
|  | GO:BP | negative regulation of organelle organization                                                                | 0.002335666 | GO:0010639 |
|  | GO:BP | mitotic centrosome separation                                                                                | 0.002420067 | GO:0007100 |
|  | GO:MF | endoribonuclease activity, producing 5'-phosphomonoesters                                                    | 0.00285947  | GO:0016891 |
|  | GO:BP | positive regulation of mitotic cell cycle                                                                    | 0.002913546 | GO:0045931 |
|  | GO:BP | signal transduction involved in DNA integrity checkpoint                                                     | 0.002913546 | GO:0072401 |
|  | GO:BP | centrosome separation                                                                                        | 0.002913546 | GO:0051299 |
|  | GO:BP | signal transduction involved in DNA damage checkpoint                                                        | 0.002913546 | GO:0072422 |
|  | GO:BP | signal transduction involved in cell cycle checkpoint                                                        | 0.00308288  | GO:0072395 |
|  | GO:BP | nuclear envelope disassembly                                                                                 | 0.003479342 | GO:0051081 |
|  | GO:BP | membrane disassembly                                                                                         | 0.003479342 | GO:0030397 |
|  | GO:BP | meiosis I cell cycle process                                                                                 | 0.003517254 | GO:0061982 |
|  | GO:CC | condensed chromosome inner kinetochore                                                                       | 0.003582567 | GO:0000939 |
|  | GO:BP | sexual reproduction                                                                                          | 0.003782959 | GO:0019953 |
|  | GO:BP | establishment of chromosome localization                                                                     | 0.003800757 | GO:0051303 |
|  | GO:BP | meiotic nuclear division                                                                                     | 0.003944932 | GO:0140013 |
|  | GO:BP | chromosome localization                                                                                      | 0.003973813 | GO:0050000 |
|  | GO:BP | chromosome condensation                                                                                      | 0.00490138  | GO:0030261 |
|  | GO:BP | oocyte development                                                                                           | 0.005720334 | GO:0048599 |
|  | GO:BP | DNA replication, removal of RNA primer                                                                       | 0.005720334 | GO:0043137 |
|  | GO:BP | nucleus organization                                                                                         | 0.005760527 | GO:0006997 |
|  | GO:BP | negative regulation of mitotic cell cycle phase transition                                                   | 0.005832908 | GO:1901991 |
|  | GO:BP | protein-DNA complex assembly                                                                                 | 0.006607885 | GO:0065004 |
|  | GO:BP | protein localization to chromosome, centromeric region                                                       | 0.007301626 | GO:0071459 |
|  | GO:BP | ATP-dependent chromatin remodeling                                                                           | 0.007301626 | GO:0043044 |
|  | GO:BP | meiotic chromosome segregation                                                                               | 0.00757291  | GO:0045132 |
|  | GO:BP | positive regulation of mitotic cell cycle phase transition                                                   | 0.007904222 | GO:1901992 |
|  | GO:BP | oocyte differentiation                                                                                       | 0.007981453 | GO:0009994 |
|  | GO:CC | endoribonuclease complex                                                                                     | 0.008005619 | GO:1902555 |
|  | GO:BP | interstrand cross-link repair                                                                                | 0.008528469 | GO:0036297 |
|  | GO:BP | positive regulation of exit from mitosis                                                                     | 0.008739152 | GO:0031536 |
|  | GO:BP | positive regulation of mitochondrial ATP synthesis coupled electron transport                                | 0.008739152 | GO:1905448 |
|  | GO:MF | endonuclease activity, active with either ribo- or deoxyribonucleic acids and producing 5'-phosphomonoesters | 0.00924625  | GO:0016893 |
|  | GO:MF | four-way junction DNA binding                                                                                | 0.00924625  | GO:0000400 |
|  | GO:MF | ribonuclease A activity                                                                                      | 0.009384311 | GO:0004522 |

|  |       |                                                                                                              |             |            |
|--|-------|--------------------------------------------------------------------------------------------------------------|-------------|------------|
|  | GO:MF | cyclin-dependent protein serine/threonine kinase regulator activity                                          | 0.009384311 | GO:0016538 |
|  | GO:MF | double-stranded DNA exodeoxyribonuclease activity                                                            | 0.009384311 | GO:0008309 |
|  | GO:CC | axon hillock                                                                                                 | 0.009465101 | GO:0043203 |
|  | GO:BP | multicellular organismal reproductive process                                                                | 0.009882639 | GO:0048609 |
|  | GO:BP | regulation of cyclin-dependent protein serine/threonine kinase activity                                      | 0.010106142 | GO:0000079 |
|  | GO:BP | DNA damage response, signal transduction by p53 class mediator resulting in cell cycle arrest                | 0.010175176 | GO:0006977 |
|  | GO:BP | regulation of ubiquitin protein ligase activity                                                              | 0.010207597 | GO:1904666 |
|  | GO:CC | replication fork                                                                                             | 0.010364576 | GO:0005657 |
|  | GO:BP | signal transduction involved in mitotic G1 DNA damage checkpoint                                             | 0.010597526 | GO:0072431 |
|  | GO:BP | intracellular signal transduction involved in G1 DNA damage checkpoint                                       | 0.010597526 | GO:1902400 |
|  | GO:BP | sister chromatid cohesion                                                                                    | 0.010597526 | GO:0007062 |
|  | GO:BP | multicellular organism reproduction                                                                          | 0.011026649 | GO:0032504 |
|  | GO:MF | hydrolase activity                                                                                           | 0.011170154 | GO:0016787 |
|  | GO:BP | regulation of centrosome cycle                                                                               | 0.011176062 | GO:0046605 |
|  | GO:BP | regulation of cyclin-dependent protein kinase activity                                                       | 0.011480599 | GO:1904029 |
|  | GO:BP | signal transduction involved in mitotic DNA damage checkpoint                                                | 0.011544944 | GO:1902402 |
|  | GO:BP | signal transduction involved in mitotic DNA integrity checkpoint                                             | 0.011544944 | GO:1902403 |
|  | GO:BP | regulation of DNA recombination                                                                              | 0.011544944 | GO:0000018 |
|  | GO:BP | signal transduction involved in mitotic cell cycle checkpoint                                                | 0.011544944 | GO:0072413 |
|  | GO:BP | regulation of cell cycle G2/M phase transition                                                               | 0.011544944 | GO:1902749 |
|  | GO:BP | cellular process involved in reproduction in multicellular organism                                          | 0.011544944 | GO:0022412 |
|  | GO:CC | protein-containing complex                                                                                   | 0.011588775 | GO:0032991 |
|  | GO:BP | DNA integrity checkpoint                                                                                     | 0.012311113 | GO:0031570 |
|  | GO:BP | positive regulation of G2/M transition of mitotic cell cycle                                                 | 0.013276315 | GO:0010971 |
|  | GO:BP | mitotic DNA integrity checkpoint                                                                             | 0.013368646 | GO:0044774 |
|  | GO:BP | telomere maintenance                                                                                         | 0.013368646 | GO:0000723 |
|  | GO:CC | microtubule                                                                                                  | 0.013755776 | GO:0005874 |
|  | GO:CC | transferase complex, transferring phosphorus-containing groups                                               | 0.013755776 | GO:0061695 |
|  | GO:MF | endonuclease activity, active with either ribo- or deoxyribonucleic acids and producing 3'-phosphomonoesters | 0.014090039 | GO:0016894 |
|  | GO:BP | mitotic G1/S transition checkpoint                                                                           | 0.014093744 | GO:0044819 |
|  | GO:BP | mitotic G1 DNA damage checkpoint                                                                             | 0.014093744 | GO:0031571 |
|  | GO:BP | positive regulation of cell cycle phase transition                                                           | 0.014263833 | GO:1901989 |
|  | GO:BP | G1 DNA damage checkpoint                                                                                     | 0.0147784   | GO:0044783 |
|  | GO:BP | pigment catabolic process                                                                                    | 0.014952787 | GO:0046149 |
|  | GO:BP | L-serine biosynthetic process                                                                                | 0.014952787 | GO:0006564 |
|  | GO:BP | heme catabolic process                                                                                       | 0.014952787 | GO:0042167 |
|  | GO:BP | tetrapyrrole catabolic process                                                                               | 0.014952787 | GO:0033015 |
|  | GO:BP | meiotic cell cycle checkpoint                                                                                | 0.014952787 | GO:0033313 |
|  | GO:BP | porphyrin-containing compound catabolic process                                                              | 0.014952787 | GO:0006787 |
|  | GO:BP | protein-DNA complex subunit organization                                                                     | 0.014952787 | GO:0071824 |

|  |       |                                                                      |             |            |
|--|-------|----------------------------------------------------------------------|-------------|------------|
|  | GO:BP | cellular catabolic process                                           | 0.015425916 | GO:0044248 |
|  | GO:CC | cell                                                                 | 0.015798619 | GO:0005623 |
|  | GO:BP | spermatogenesis                                                      | 0.016145495 | GO:0007283 |
|  | GO:BP | positive regulation of cell cycle G2/M phase transition              | 0.016522774 | GO:1902751 |
|  | GO:MF | magnesium ion binding                                                | 0.016627611 | GO:0000287 |
|  | GO:MF | DNA secondary structure binding                                      | 0.016627611 | GO:0000217 |
|  | GO:BP | meiosis I                                                            | 0.016895619 | GO:0007127 |
|  | GO:BP | regulation of transferase activity                                   | 0.016972435 | GO:0051338 |
|  | GO:BP | catabolic process                                                    | 0.017236327 | GO:0009056 |
|  | GO:CC | protein-DNA complex                                                  | 0.017275673 | GO:0032993 |
|  | GO:BP | telomere organization                                                | 0.017788178 | GO:0032200 |
|  | GO:BP | organelle localization                                               | 0.017788178 | GO:0051640 |
|  | GO:BP | establishment of localization in cell                                | 0.018238785 | GO:0051649 |
|  | GO:BP | fatty acid alpha-oxidation                                           | 0.018570431 | GO:0001561 |
|  | GO:BP | female meiosis I                                                     | 0.018570431 | GO:0007144 |
|  | GO:BP | regulation of mitochondrial ATP synthesis coupled electron transport | 0.018570431 | GO:1905446 |
|  | GO:BP | regulation of meiotic nuclear division                               | 0.018723551 | GO:0040020 |
|  | GO:BP | DNA replication-dependent nucleosome assembly                        | 0.018723551 | GO:0006335 |
|  | GO:BP | DNA replication-dependent nucleosome organization                    | 0.018723551 | GO:0034723 |
|  | GO:BP | organic substance catabolic process                                  | 0.018877934 | GO:1901575 |
|  | GO:BP | chromatin remodeling                                                 | 0.01948724  | GO:0006338 |
|  | GO:BP | multi-organism reproductive process                                  | 0.01948724  | GO:0044703 |
|  | GO:BP | male gamete generation                                               | 0.01948724  | GO:0048232 |
|  | GO:BP | nucleic acid metabolic process                                       | 0.020740775 | GO:0090304 |
|  | GO:MF | transferase activity, transferring phosphorus-containing groups      | 0.021048831 | GO:0016772 |
|  | GO:BP | mismatch repair                                                      | 0.021465168 | GO:0006298 |
|  | GO:BP | attachment of spindle microtubules to kinetochore                    | 0.021465168 | GO:0008608 |
|  | GO:BP | centrosome cycle                                                     | 0.021465168 | GO:0007098 |
|  | GO:BP | regulation of mitotic centrosome separation                          | 0.022220411 | GO:0046602 |
|  | GO:BP | DNA topological change                                               | 0.022220411 | GO:0006265 |
|  | GO:BP | cellular component assembly                                          | 0.022389035 | GO:0022607 |
|  | GO:MF | damaged DNA binding                                                  | 0.023144616 | GO:0003684 |
|  | GO:BP | reproductive process                                                 | 0.024438202 | GO:0022414 |
|  | GO:BP | animal organ regeneration                                            | 0.024438202 | GO:0031100 |
|  | GO:BP | apoptotic nuclear changes                                            | 0.024618077 | GO:0030262 |
|  | GO:CC | catalytic complex                                                    | 0.024679278 | GO:1902494 |
|  | GO:BP | reproduction                                                         | 0.024786241 | GO:0000003 |
|  | GO:BP | establishment of organelle localization                              | 0.026196063 | GO:0051656 |
|  | GO:BP | positive regulation of cellular respiration                          | 0.026587134 | GO:1901857 |
|  | GO:BP | negative regulation of membrane permeability                         | 0.026587134 | GO:1905709 |
|  | GO:BP | microtubule organizing center organization                           | 0.02727559  | GO:0031023 |
|  | GO:BP | signal transduction in response to DNA damage                        | 0.02727559  | GO:0042770 |

|  |       |                                                                         |             |            |
|--|-------|-------------------------------------------------------------------------|-------------|------------|
|  | GO:BP | cellular component disassembly involved in execution phase of apoptosis | 0.027849327 | GO:0006921 |
|  | GO:BP | signal transduction by p53 class mediator                               | 0.027873073 | GO:0072331 |
|  | GO:MF | 5'-flap endonuclease activity                                           | 0.027983834 | GO:0017108 |
|  | GO:CC | supramolecular complex                                                  | 0.029230741 | GO:0099080 |
|  | GO:CC | chromocenter                                                            | 0.029230741 | GO:0010369 |
|  | GO:BP | positive regulation of cell cycle arrest                                | 0.029264413 | GO:0071158 |
|  | GO:BP | regulation of G2/M transition of mitotic cell cycle                     | 0.029819089 | GO:0010389 |
|  | GO:CC | cytoskeleton                                                            | 0.03036371  | GO:0005856 |
|  | GO:CC | peroxisomal matrix                                                      | 0.03036371  | GO:0005782 |
|  | GO:CC | microbody lumen                                                         | 0.03036371  | GO:0031907 |
|  | GO:MF | hydrolase activity, acting on ester bonds                               | 0.030593117 | GO:0016788 |
|  | GO:BP | histone-serine phosphorylation                                          | 0.031007442 | GO:0035404 |
|  | GO:BP | cellular response to iron ion                                           | 0.031007442 | GO:0071281 |
|  | GO:BP | positive regulation of oxidative phosphorylation                        | 0.031007442 | GO:1903862 |
|  | GO:MF | flap endonuclease activity                                              | 0.031153176 | GO:0048256 |
|  | GO:MF | cyclin-dependent protein serine/threonine kinase activator activity     | 0.031153176 | GO:0061575 |
|  | GO:BP | small molecule metabolic process                                        | 0.031877877 | GO:0044281 |
|  | GO:BP | protein localization to chromosome                                      | 0.032303176 | GO:0034502 |
|  | GO:BP | regulation of double-strand break repair                                | 0.032303176 | GO:2000779 |
|  | GO:CC | pronucleus                                                              | 0.034341765 | GO:0045120 |
|  | GO:CC | tertiary granule lumen                                                  | 0.034341765 | GO:1904724 |
|  | GO:BP | regulation of organelle organization                                    | 0.034537065 | GO:0033043 |
|  | GO:BP | water-soluble vitamin metabolic process                                 | 0.034837842 | GO:0006767 |
|  | GO:BP | regulation of DNA metabolic process                                     | 0.03515706  | GO:0051052 |
|  | GO:BP | ventricular cardiac muscle cell development                             | 0.035409606 | GO:0055015 |
|  | GO:BP | negative regulation of meiotic nuclear division                         | 0.035409606 | GO:0045835 |
|  | GO:BP | L-serine metabolic process                                              | 0.035409606 | GO:0006563 |
|  | GO:BP | positive regulation of ubiquitin protein ligase activity                | 0.035409606 | GO:1904668 |
|  | GO:CC | kinesin complex                                                         | 0.035515841 | GO:0005871 |
|  | GO:BP | response to stress                                                      | 0.036150006 | GO:0006950 |
|  | GO:BP | oogenesis                                                               | 0.036552324 | GO:0048477 |
|  | GO:BP | cellular component biogenesis                                           | 0.036552324 | GO:0044085 |
|  | GO:BP | cellular response to hypoxia                                            | 0.036857167 | GO:0071456 |
|  | GO:CC | microbody membrane                                                      | 0.037425132 | GO:0031903 |
|  | GO:CC | DNA topoisomerase type II (double strand cut, ATP-hydrolyzing) complex  | 0.037425132 | GO:0009330 |
|  | GO:CC | Ire1 complex                                                            | 0.037425132 | GO:1990332 |
|  | GO:CC | peroxisomal membrane                                                    | 0.037425132 | GO:0005778 |
|  | GO:CC | nucleosome                                                              | 0.037425132 | GO:0000786 |
|  | GO:CC | BAX complex                                                             | 0.037425132 | GO:0097144 |
|  | GO:CC | germ cell nucleus                                                       | 0.037425132 | GO:0043073 |
|  | GO:CC | spindle microtubule                                                     | 0.037425132 | GO:0005876 |

|                                                 |               |                                                                        |             |                |
|-------------------------------------------------|---------------|------------------------------------------------------------------------|-------------|----------------|
|                                                 | GO:CC         | Dcp1-Dcp2 complex                                                      | 0.037425132 | GO:0098745     |
|                                                 | GO:BP         | DNA damage checkpoint                                                  | 0.039105571 | GO:0000077     |
|                                                 | GO:BP         | oxidation-reduction process                                            | 0.039157174 | GO:0055114     |
|                                                 | GO:BP         | somatic hypermutation of immunoglobulin genes                          | 0.040243329 | GO:0016446     |
|                                                 | GO:BP         | alpha-linolenic acid metabolic process                                 | 0.040243329 | GO:0036109     |
|                                                 | GO:MF         | protein heterodimerization activity                                    | 0.040624138 | GO:0046982     |
|                                                 | GO:CC         | DNA packaging complex                                                  | 0.042027616 | GO:0044815     |
|                                                 | GO:CC         | mitochondrion                                                          | 0.042202252 | GO:0005739     |
|                                                 | GO:MF         | endoribonuclease activity, producing 3'-phosphomonoesters              | 0.043416027 | GO:0016892     |
|                                                 | GO:BP         | cellular component disassembly                                         | 0.044974411 | GO:0022411     |
|                                                 | GO:BP         | cellular response to decreased oxygen levels                           | 0.045011332 | GO:0036294     |
|                                                 | GO:BP         | positive regulation of endoplasmic reticulum unfolded protein response | 0.045017438 | GO:1900103     |
|                                                 | GO:BP         | somatic diversification of immune receptors via somatic mutation       | 0.045017438 | GO:0002566     |
|                                                 | GO:BP         | regulation of mitotic cell cycle spindle assembly checkpoint           | 0.045017438 | GO:0090266     |
|                                                 | GO:BP         | regulation of spindle checkpoint                                       | 0.045017438 | GO:0090231     |
|                                                 | GO:BP         | cytoskeleton organization                                              | 0.045017438 | GO:0007010     |
|                                                 | GO:BP         | regulation of mitotic spindle checkpoint                               | 0.045017438 | GO:1903504     |
|                                                 | GO:BP         | regulation of attachment of spindle microtubules to kinetochore        | 0.045017438 | GO:0051988     |
|                                                 | GO:BP         | cell cycle G1/S phase transition                                       | 0.045097223 | GO:0044843     |
|                                                 | GO:BP         | organelle assembly                                                     | 0.046138789 | GO:0070925     |
|                                                 | GO:BP         | regulation of double-strand break repair via homologous recombination  | 0.04646997  | GO:0010569     |
|                                                 | GO:MF         | Hsp70 protein binding                                                  | 0.048162635 | GO:0030544     |
|                                                 | GO:MF         | kinase activity                                                        | 0.048440634 | GO:0016301     |
|                                                 | GO:MF         | catalytic activity, acting on DNA                                      | 0.048440634 | GO:0140097     |
|                                                 | GO:MF         | endodeoxyribonuclease activity                                         | 0.049347553 | GO:0004520     |
|                                                 | KEGG          | Cell cycle                                                             | 6.18227E-07 | 04110          |
|                                                 | KEGG          | Metabolic pathways                                                     | 1.95561E-06 | 01100          |
|                                                 | KEGG          | Oocyte meiosis                                                         | 0.000118625 | 04114          |
|                                                 | KEGG          | Human T-cell leukemia virus 1 infection                                | 0.000143411 | 05166          |
|                                                 | KEGG          | Progesterone-mediated oocyte maturation                                | 0.000367074 | 04914          |
|                                                 | KEGG          | p53 signaling pathway                                                  | 0.001683134 | 04115          |
|                                                 | KEGG          | Viral carcinogenesis                                                   | 0.006700643 | 05203          |
|                                                 | KEGG          | Human immunodeficiency virus 1 infection                               | 0.007441179 | 05170          |
|                                                 | KEGG          | Cellular senescence                                                    | 0.020259929 | 04218          |
|                                                 | KEGG          | Platinum drug resistance                                               | 0.020259929 | 01524          |
|                                                 | KEGG          | Peroxisome                                                             | 0.026269595 | 04146          |
| <b>Upregulated in the double-low_Lund group</b> | <b>Source</b> | <b>Terms</b>                                                           | <b>FDR</b>  | <b>Term ID</b> |
|                                                 | GO:MF         | ubiquitin-dependent protein binding                                    | 0.00057133  | GO:0140036     |
|                                                 | GO:MF         | ubiquitination-like modification-dependent protein binding             | 0.00057133  | GO:0140035     |
|                                                 | KEGG          | Metabolic pathways                                                     | 0.000614264 | 01100          |
| <b>K5/6-only_Lund vs double-low_Lund</b>        |               |                                                                        |             |                |
| <b>Upregulated in the K5/6-only_Lund group</b>  | <b>Source</b> | <b>Terms</b>                                                           | <b>FDR</b>  | <b>Term ID</b> |

|                                                 |               |                                                                                                       |             |                |
|-------------------------------------------------|---------------|-------------------------------------------------------------------------------------------------------|-------------|----------------|
|                                                 | GO:BP         | regulation of somitogenesis                                                                           | 0.013655613 | GO:0014807     |
|                                                 | GO:BP         | Notch signaling pathway involved in somitogenesis                                                     | 0.013702988 | GO:1902359     |
|                                                 | GO:BP         | negative regulation of Notch signaling pathway involved in somitogenesis                              | 0.013702988 | GO:1902367     |
|                                                 | GO:BP         | regulation of Notch signaling pathway involved in somitogenesis                                       | 0.013702988 | GO:1902366     |
|                                                 | GO:BP         | epithelium development                                                                                | 0.014033531 | GO:0060429     |
|                                                 | GO:BP         | cellular response to nutrient levels                                                                  | 0.046975249 | GO:0031669     |
| <b>Upregulated in the double-low_Lund group</b> | <b>Source</b> | <b>Terms</b>                                                                                          | <b>FDR</b>  | <b>Term ID</b> |
|                                                 | GO:CC         | intracellular                                                                                         | 4.40172E-05 | GO:0005622     |
|                                                 | GO:BP         | small molecule metabolic process                                                                      | 0.021708795 | GO:0044281     |
|                                                 | GO:MF         | catalytic activity                                                                                    | 0.022959617 | GO:0003824     |
|                                                 | GO:MF         | phosphotransferase activity, nitrogenous group as acceptor                                            | 0.022959617 | GO:0016775     |
|                                                 | GO:MF         | deoxycytidine deaminase activity                                                                      | 0.022959617 | GO:0047844     |
|                                                 | GO:MF         | creatine kinase activity                                                                              | 0.022959617 | GO:0004111     |
|                                                 | GO:BP         | phosphagen biosynthetic process                                                                       | 0.024830604 | GO:0042396     |
|                                                 | GO:BP         | oxoacid metabolic process                                                                             | 0.024830604 | GO:0043436     |
|                                                 | GO:BP         | positive regulation of exit from mitosis                                                              | 0.024830604 | GO:0031536     |
|                                                 | GO:BP         | phosphocreatine metabolic process                                                                     | 0.024830604 | GO:0006603     |
|                                                 | GO:BP         | phosphocreatine biosynthetic process                                                                  | 0.024830604 | GO:0046314     |
|                                                 | GO:BP         | phosphagen metabolic process                                                                          | 0.024830604 | GO:0006599     |
|                                                 | GO:BP         | organic acid metabolic process                                                                        | 0.024830604 | GO:0006082     |
|                                                 | GO:BP         | threonine metabolic process                                                                           | 0.029733526 | GO:0006566     |
|                                                 | GO:BP         | carboxylic acid metabolic process                                                                     | 0.029733526 | GO:0019752     |
|                                                 | GO:MF         | NADP-retinol dehydrogenase activity                                                                   | 0.035783519 | GO:0052650     |
|                                                 | GO:MF         | cytidine deaminase activity                                                                           | 0.035783519 | GO:0004126     |
|                                                 | GO:MF         | calcium-transporting ATPase activity involved in regulation of cardiac muscle cell membrane potential | 0.036411784 | GO:0086039     |
|                                                 | GO:MF         | squalene monooxygenase activity                                                                       | 0.036411784 | GO:0004506     |
|                                                 | GO:MF         | propionate CoA-transferase activity                                                                   | 0.036411784 | GO:0018729     |
|                                                 | GO:MF         | lutropin-choriogonadotropic hormone receptor binding                                                  | 0.036411784 | GO:0031775     |
|                                                 | GO:MF         | glycine C-acetyltransferase activity                                                                  | 0.036411784 | GO:0008890     |
|                                                 | GO:MF         | aldo-keto reductase (NADP) activity                                                                   | 0.036411784 | GO:0004033     |
|                                                 | GO:MF         | C-C chemokine binding                                                                                 | 0.036411784 | GO:0019957     |
|                                                 | GO:MF         | phosphoglycerate dehydrogenase activity                                                               | 0.036411784 | GO:0004617     |
|                                                 | GO:MF         | chemokine receptor activity                                                                           | 0.036411784 | GO:0004950     |
|                                                 | GO:MF         | palmitoyl-CoA 9-desaturase activity                                                                   | 0.036411784 | GO:0032896     |
|                                                 | GO:MF         | chemokine (C-C motif) ligand 21 binding                                                               | 0.036411784 | GO:0035758     |
|                                                 | GO:MF         | C-acyltransferase activity                                                                            | 0.036411784 | GO:0016408     |
|                                                 | GO:MF         | chemokine (C-C motif) ligand 19 binding                                                               | 0.036411784 | GO:0035757     |
|                                                 | GO:MF         | G protein-coupled chemoattractant receptor activity                                                   | 0.036411784 | GO:0001637     |
|                                                 | GO:MF         | C-C motif chemokine 19 receptor activity                                                              | 0.036411784 | GO:0038117     |
|                                                 | GO:MF         | alkyl hydroperoxide reductase activity                                                                | 0.036411784 | GO:0008785     |

|  |       |                                                                                           |             |            |
|--|-------|-------------------------------------------------------------------------------------------|-------------|------------|
|  | GO:MF | alcohol dehydrogenase (NADP+) activity                                                    | 0.036411784 | GO:0008106 |
|  | GO:MF | glyceraldehyde oxidoreductase activity                                                    | 0.036411784 | GO:0043795 |
|  | GO:MF | C-C chemokine receptor activity                                                           | 0.036411784 | GO:0016493 |
|  | GO:MF | C-C motif chemokine 21 receptor activity                                                  | 0.036411784 | GO:0038121 |
|  | GO:MF | protein-glucosylgalactosylhydroxylysine glucosidase activity                              | 0.036411784 | GO:0047402 |
|  | GO:MF | N-acetylgalactosamine-6-phosphate deacetylase activity                                    | 0.036411784 | GO:0047419 |
|  | GO:MF | oxidoreductase activity                                                                   | 0.036411784 | GO:0016491 |
|  | GO:BP | pyrimidine nucleoside metabolic process                                                   | 0.041512751 | GO:0006213 |
|  | GO:BP | creatine metabolic process                                                                | 0.042513438 | GO:0006600 |
|  | GO:BP | monocarboxylic acid metabolic process                                                     | 0.042513438 | GO:0032787 |
|  | GO:MF | deaminase activity                                                                        | 0.045457353 | GO:0019239 |
|  | GO:MF | hydrolase activity, acting on carbon-nitrogen (but not peptide) bonds, in cyclic amidines | 0.04995469  | GO:0016814 |
|  | KEGG  | Metabolic pathways                                                                        | 2.15142E-07 | 01100      |

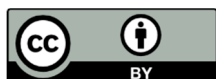

© 2020 by the authors. Submitted for possible open access publication under the terms and conditions of the Creative Commons Attribution (CC BY) license (<http://creativecommons.org/licenses/by/4.0/>).
